# Supplementary material for: Design and prediction of high potentansa-zirconocene catalyst for olefin polymerizations: combined DFT calculations and QSPR approach
Source: Royal Society of Chemistry journal article supplement (doi:10.1039/d1nj00655j), 2021-01-01
Supplement: d1nj00655j1.pdf [file d1nj00655j1.pdf]

## Electronic Supplementary Information (ESI)

### Design and Prediction of High Potent *ansa*-Zirconocene Catalyst for Olefin Polymerizations: Combined DFT Calculations and QSPR Approach

Manussada Ratanasak,<sup>ab</sup> Jun-ya Hasegawa,<sup>a</sup> Vudhichai Parasuk<sup>b\*</sup>

<sup>a</sup> Institute for Catalysis, Hokkaido University, Kita 21, Nishi 10, Sapporo, Hokkaido 001-0021, Japan.

<sup>b</sup> Center of Excellence in Computational Chemistry, Department of Chemistry, Faculty of Science, Chulalongkorn University, Bangkok 10330, Thailand.

\*Corresponding author. Tel: +6622187603; Fax: +6622187603;

E-mail address: vudhichai.p@chula.ac.th

#### Contents

1. **Table S1.** Geometry,  $\alpha$ -agostic interaction (TS) and  $\pi$  coordination (reactant complex); Second Order Perturbation Theory Analysis ( $E(2)$ / kcal mol<sup>-1</sup>) of five monomers with the most favorable pathway (for the primary (1,2)-*si* insertion path of PP, BT, and HX monomers and the secondary (2,1)-*si* insertion path of ST monomer).
2. **Table S2.** Results of the intrinsic activation energy ( $E_a$ ), the reaction energy ( $\Delta E_r$ ), the  $\pi$ -complexation energy ( $\Delta E_\pi$ ), and the apparent activation energy ( $E_{a(\text{app})}$ ) in kcal/mol for ET, the primary (1,2)-*si* insertion of PP, BT, and HX monomers and the secondary (2,1)-*si* insertion of ST monomer in gas phase and in toluene and cyclohexane solvents.
3. **Fig. S1** Correlation between the activation energy and the experimental activity of *ansa*-zirconocene catalysts (Cat. 1-4).
4. Optimized cartesian coordinates (XYZ) of all structures.

**Table S1.** Geometry,  $\alpha$ -agostic interaction (TS) and  $\pi$  coordination (reactant complex); Second Order Perturbation Theory Analysis ( $E(2)$ / kcal mol<sup>-1</sup>) of five monomers with the most favorable pathway (for the primary (1,2)-*si* insertion path of PP, BT, and HX monomers and the secondary (2,1)-*si* insertion path of ST monomer).

| Monomer | TS structure                                                              |                                            |                                            |                                                                                | E(2) (kcal mol <sup>-1</sup> )              |                                          |
|---------|---------------------------------------------------------------------------|--------------------------------------------|--------------------------------------------|--------------------------------------------------------------------------------|---------------------------------------------|------------------------------------------|
|         | C <sub><math>\alpha</math></sub> -H <sub><math>\alpha</math></sub><br>(Å) | Zr-H <sub><math>\alpha</math></sub><br>(Å) | Zr-C <sub><math>\alpha</math></sub><br>(Å) | Zr-C <sub><math>\alpha</math></sub> -H <sub><math>\alpha</math></sub><br>(deg) | $\alpha$ -agostic Interaction<br>(TS)       | $\pi$ coordination<br>(Reactant complex) |
|         |                                                                           |                                            |                                            |                                                                                | C-H <sub><math>\alpha</math></sub> → LP* Zr | C <sub>1</sub> -C <sub>2</sub> → LP* Zr  |
| ET      | 1.151                                                                     | 2.090                                      | 2.272                                      | 66.1                                                                           | LP*(4) 26.94<br>LP*(1) 4.97                 | LP*(5) 3.99<br>LP*(4) 4.88               |
| PP      | 1.150                                                                     | 2.055                                      | 2.303                                      | 63.0                                                                           | LP*(4) 26.40<br>LP*(1) 4.33                 | LP*(8) 4.52<br>LP*(4) 1.95               |
| BT      | 1.153                                                                     | 2.061                                      | 2.295                                      | 63.7                                                                           | LP*(4) 26.28<br>LP*(1) 4.34                 | LP*(8) 3.04<br>LP*(4) 3.20               |
| HX      | 1.153                                                                     | 2.061                                      | 2.295                                      | 63.7                                                                           | LP*(4) 26.84<br>LP*(1) 4.45                 | LP*(8) 4.59<br>LP*(4) 3.01               |
| ST      | 1.153                                                                     | 2.087                                      | 2.294                                      | 65.0                                                                           | LP*(4) 27.42<br>LP*(1) 5.04                 | LP*(8) 3.64<br>LP*(4) 13.96              |

**Table S2.** Results of the intrinsic activation energy ( $E_a$ ), the reaction energy ( $\Delta E_r$ ), the  $\pi$ -complexation energy ( $\Delta E_\pi$ ), and the apparent activation energy ( $E_{a(\text{app})}$ ) in kcal/mol for ET, the primary (1,2)-*si* insertion of PP, BT, and HX monomers and the secondary (2,1)-*si* insertion of ST monomer in gas phase and in toluene and cyclohexane solvents.

| Cat. 3 with<br>Olefin monomer | In gas phase   |              |                |                     | In toluene |              |                |                     |
|-------------------------------|----------------|--------------|----------------|---------------------|------------|--------------|----------------|---------------------|
|                               | $E_a$          | $\Delta E_r$ | $\Delta E_\pi$ | $E_{a(\text{app})}$ | $E_a$      | $\Delta E_r$ | $\Delta E_\pi$ | $E_{a(\text{app})}$ |
| ET                            | 7.94           | -9.79        | -23.76         | -15.82              | 8.29       | -10.95       | -20.57         | -12.28              |
| PP                            | 8.77           | -6.31        | -27.04         | -18.27              | 9.35       | -7.27        | -24.02         | -14.67              |
| BT                            | 8.84           | -6.91        | -28.71         | -19.87              | 9.16       | -5.96        | -25.18         | -16.02              |
| HX                            | 9.63           | -7.22        | -30.45         | -20.82              | 9.87       | -4.55        | -26.56         | -16.69              |
| ST                            | 14.26          | -3.13        | -31.56         | -17.30              | 13.66      | -3.74        | -26.59         | -13.25              |
| Cat. 3 with<br>Olefin monomer | In cyclohexane |              |                |                     |            |              |                |                     |
|                               | $E_a$          | $\Delta E_r$ | $\Delta E_\pi$ | $E_{a(\text{app})}$ |            |              |                |                     |
| ET                            | 8.23           | -10.71       | -21.13         | -12.90              |            |              |                |                     |
| PP                            | 9.24           | -7.06        | -24.56         | -15.32              |            |              |                |                     |
| BT                            | 9.11           | -5.96        | -25.80         | -16.69              |            |              |                |                     |
| HX                            | 9.81           | -4.58        | -27.20         | -17.39              |            |              |                |                     |
| ST                            | 13.75          | -3.65        | -27.42         | -13.66              |            |              |                |                     |

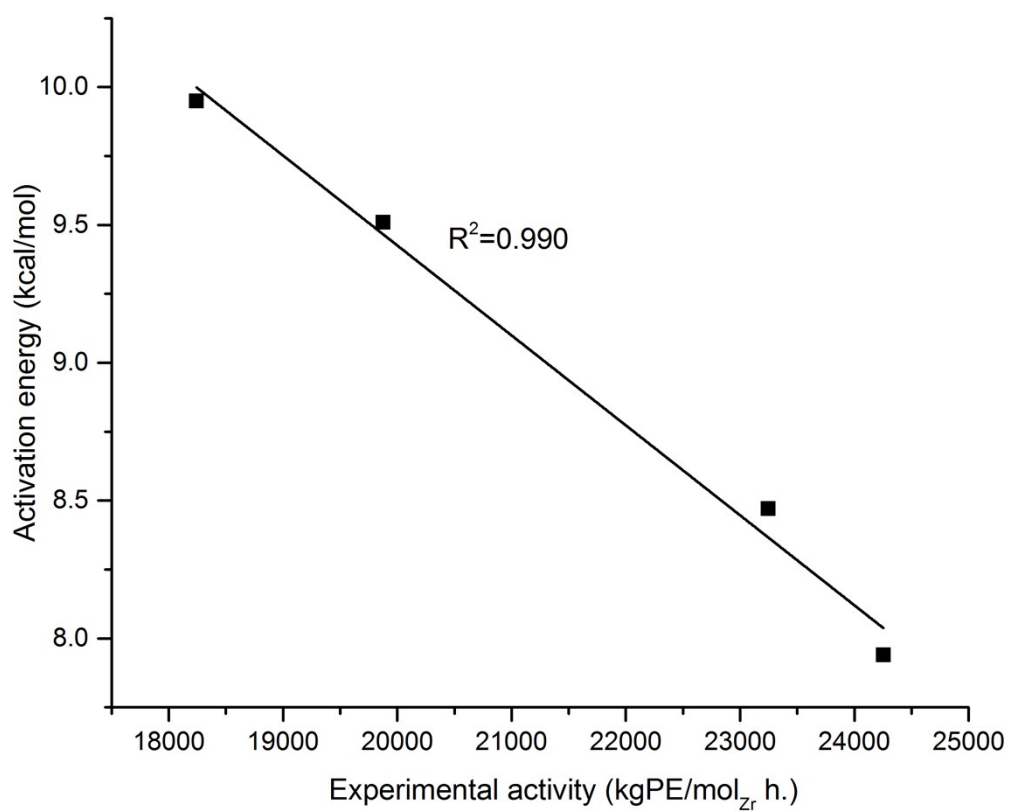

**Fig. S1** Correlation between the activation energy and the experimental activity of *ansa*-zirconocene catalysts (Cat. 1-4).

**Optimized cartesian coordinates (XYZ) of all structures.**

|                                |                           |                                |
|--------------------------------|---------------------------|--------------------------------|
| <b>12si-PP-TS(+)<i>i</i>Bu</b> | H -3.6972 -0.1408 4.2479  | H -4.4453 2.1525 -0.9482       |
| C 0.8788 -0.1165 1.8683        | H 3.3528 -3.8843 1.1885   | H -3.7088 -1.2534 0.5438       |
| C 0.1976 1.1330 1.8891         | H 2.4326 -2.9369 2.3962   | H -4.4615 0.3398 0.8669        |
| C 0.9918 2.0391 1.1108         | H 4.1805 -2.6576 2.1973   | H -5.1964 -0.7690 -0.3257      |
| C 2.1363 1.3188 0.5981         | H 4.9365 -2.0701 -1.0420  |                                |
| C 2.0719 -0.0464 1.0666        | H 5.2170 -0.6280 -0.0315  | <b>12re-PP-TS(+)<i>i</i>Bu</b> |
| H 0.5212 -1.0161 2.3768        | H 4.2309 -0.5073 -1.5197  | C 0.8879 0.2375 1.9109         |
| Si 2.9381 -1.5733 0.3432       | H -2.7834 -2.6498 -2.1937 | C 0.1919 1.4642 1.7497         |
| C 1.5010 -1.9888 -0.8334       | H -3.4382 -3.8609 -0.1406 | C 0.9540 2.2505 0.8270         |
| C 1.2933 -1.4206 -2.1345       | H -1.8339 -4.1829 1.7358  | C 2.1102 1.4731 0.4145         |
| C -0.0777 -1.5224 -2.5106      | H 0.4999 -3.3758 1.5603   | C 2.0803 0.2037 1.1073         |
| C -0.7505 -2.2536 -1.4812      | H 0.0199 3.9876 1.2940    | H 0.5511 -0.5733 2.5551        |
| C 0.2051 -2.4953 -0.4224       | H 1.7465 5.1506 -0.0591   | Si 2.9722 -1.4145 0.6890       |
| H 2.0629 -0.9257 -2.7189       | H 3.6958 3.9110 -0.9791   | C 1.6281 -1.9958 -0.5209       |
| H -0.5114 -1.1864 -3.4510      | H 3.9847 1.4819 -0.5642   | C 1.5478 -1.5680 -1.8872       |
| C 3.2440 -2.8889 1.6526        | Zr 0.1463 0.0527 -0.4796  | C 0.2330 -1.7380 -2.3868       |
| C 4.4680 -1.1486 -0.6569       | C -2.0655 0.6919 -0.4254  | C -0.5551 -2.3305 -1.3517      |
| C -2.0799 -2.7652 -1.3715      | H -1.7563 -0.1777 0.2610  | C 0.2998 -2.4686 -0.1855       |
| C -2.4335 -3.4494 -0.2267      | H -2.2314 1.5386 0.2584   | H 2.3721 -1.1292 -2.4496       |
| C -1.5096 -3.6381 0.8429       | H 0.7482 1.0773 -3.0134   | H -0.0959 -1.5285 -3.3998      |
| C -0.2143 -3.1776 0.7636       | C 0.3733 1.6546 -2.1652   | C 3.1281 -2.5039 2.2108        |
| C 0.8544 3.4323 0.8652         | C -1.0265 1.8675 -2.0743  | C 4.5874 -1.1513 -0.2322       |
| C 1.8243 4.0716 0.1250         | H 1.0218 2.4581 -1.8073   | C -1.9102 -2.7732 -1.3028      |
| C 2.9451 3.3601 -0.4052        | C -1.5317 3.2158 -1.6318  | C -2.3888 -3.3075 -0.1281      |
| C 3.1070 2.0101 -0.1882        | H -0.8513 3.6658 -0.8993  | C -1.5637 -3.4102 1.0361       |
| C -1.0178 1.4873 2.6919        | H -2.5494 3.2030 -1.2345  | C -0.2484 -3.0008 1.0231       |
| C -1.8397 0.2899 3.1806        | H -1.6582 1.3126 -2.7721  | C 0.7732 3.5771 0.3483         |
| C -3.1233 0.7227 3.8904        | H -1.5310 3.8657 -2.5295  | C 1.7084 4.1002 -0.5220        |
| H -0.6931 2.0776 3.5705        | C -3.3905 0.2414 -1.0382  | C 2.8336 3.3307 -0.9538        |
| H -1.6599 2.1727 2.1085        | C -4.2196 1.3656 -1.6837  | C 3.0374 2.0406 -0.5094        |
| H -1.2226 -0.3239 3.8577       | C -4.2390 -0.4047 0.0769  | C -1.0152 1.9244 2.5124        |
| H -2.0945 -0.3605 2.3250       | H -3.1842 -0.5225 -1.8045 | C -1.8082 0.7981 3.1830        |
| H -3.7676 1.2995 3.2045        | H -3.7238 1.8259 -2.5455  | C -3.0700 1.3210 3.8694        |
| H -2.8955 1.3655 4.7584        | H -5.1794 0.9495 -2.0278  | H -0.6862 2.6461 3.2834        |

|           |         |         |                                |         |         |           |         |         |
|-----------|---------|---------|--------------------------------|---------|---------|-----------|---------|---------|
| H -1.6828 | 2.5072  | 1.8495  | H -4.1598                      | 0.4063  | 1.3986  | H 2.4343  | -0.1927 | 3.8672  |
| H -1.1620 | 0.2905  | 3.9198  | H -5.2437                      | -0.6033 | 0.4010  | H 1.8886  | -1.5477 | 2.9002  |
| H -2.0793 | 0.0412  | 2.4275  | C -1.9518                      | 0.7179  | -3.3978 | H 4.0318  | 0.5154  | 2.1122  |
| H -3.7358 | 1.8165  | 3.1407  | H -2.2477                      | 1.5048  | -4.1154 | H 3.4402  | -0.7328 | 1.0093  |
| H -2.8171 | 2.0627  | 4.6456  | H -1.2877                      | 0.0237  | -3.9280 | H 4.1954  | -2.5324 | 2.6063  |
| H -3.6356 | 0.5053  | 4.3469  | H -2.8677                      | 0.1911  | -3.1066 | H 4.7830  | -1.2870 | 3.7368  |
| H 3.2965  | -3.5578 | 1.9294  | H -1.7597                      | 2.2619  | -1.8292 | H 5.5596  | -1.4797 | 2.1421  |
| H 2.2237  | -2.4527 | 2.8393  |                                |         |         | H 1.3821  | 5.0585  | -1.4597 |
| H 3.9810  | -2.1707 | 2.8274  | <b>21si-PP-TS(+)<i>i</i>Bu</b> |         |         | H 2.2694  | 4.2272  | -0.1473 |
| H 5.0764  | -2.1216 | -0.4268 | C 1.4052                       | 1.4926  | 1.3766  | H 1.0482  | 5.4589  | 0.2514  |
| H 5.2817  | -0.5306 | 0.3601  | C 1.2089                       | 0.3690  | 2.2230  | H -1.8835 | 4.6920  | -1.3764 |
| H 4.4250  | -0.6548 | -1.2035 | C -0.1912                      | 0.3255  | 2.5270  | H -2.0467 | 4.6237  | 0.4005  |
| H -2.5398 | -2.7089 | -2.1921 | C -0.8410                      | 1.4282  | 1.8400  | H -2.5512 | 3.2310  | -0.6001 |
| H -3.4183 | -3.6671 | -0.0774 | C 0.1615                       | 2.1636  | 1.1003  | H 1.8705  | -1.8116 | -3.5579 |
| H -1.9858 | -3.8418 | 1.9457  | H 2.3718                       | 1.7888  | 0.9738  | H 4.2265  | -1.1469 | -3.1690 |
| H 0.3833  | -3.1164 | 1.9040  | Si -0.0587                     | 3.3304  | -0.3810 | H 4.7883  | 0.9772  | -2.0068 |
| H -0.0741 | 4.1748  | 0.6911  | C 0.1534                       | 1.9529  | -1.6764 | H 3.0082  | 2.5291  | -1.2549 |
| H 1.5990  | 5.1240  | -0.8852 | C -0.8953                      | 1.1012  | -2.1508 | H -0.4489 | -1.3455 | 3.9140  |
| H 3.5515  | 3.7851  | -1.6392 | C -0.3629                      | -0.1172 | -2.6533 | H -2.8844 | -0.9301 | 4.1927  |
| H 3.9155  | 1.4746  | -0.8217 | C 1.0637                       | -0.0220 | -2.5924 | H -4.0053 | 0.9521  | 3.0199  |
| Zr 0.1974 | 0.0270  | -0.4805 | C 1.3860                       | 1.2378  | -1.9522 | H -2.7386 | 2.4693  | 1.5242  |
| C -2.0538 | 0.4774  | -0.3847 | H -1.9556                      | 1.3329  | -2.0830 | Zr 0.0882 | 0.0224  | -0.1248 |
| H -1.6967 | -0.4167 | 0.2400  | H -0.9272                      | -0.9332 | -3.0989 | C 1.0896  | -2.0321 | 0.0525  |
| H -2.0185 | 1.3625  | 0.2668  | C 1.2894                       | 4.6361  | -0.4441 | H 1.7810  | -1.1654 | -0.2478 |
| H 0.6924  | 0.9904  | -3.1204 | C -1.7986                      | 4.0308  | -0.4967 | H 1.2456  | -2.2050 | 1.1265  |
| C 0.1868  | 1.4813  | -2.2832 | C 2.1080                       | -0.8846 | -3.0339 | C -1.9513 | -1.0870 | 0.1148  |
| C -1.2350 | 1.4099  | -2.2669 | C 3.4148                       | -0.5071 | -2.8173 | C -1.1783 | -2.2576 | -0.0105 |
| H 0.6504  | 2.4003  | -1.9191 | C 3.7384                       | 0.7159  | -2.1524 | H -2.2233 | -0.8450 | 1.1451  |
| C -3.5194 | 0.1782  | -0.6788 | C 2.7536                       | 1.5781  | -1.7232 | H -1.1434 | -2.7843 | -0.9676 |
| C -4.2783 | 1.4283  | -1.1465 | C -0.9435                      | -0.5358 | 3.3732  | C 1.5660  | -3.2498 | -0.7282 |
| C -4.1885 | -0.3564 | 0.6029  | C -2.2931                      | -0.2948 | 3.5303  | C 0.9598  | -4.5578 | -0.1977 |
| H -3.5861 | -0.6151 | -1.4417 | C -2.9385                      | 0.7894  | 2.8550  | C 3.1009  | -3.3281 | -0.6157 |
| H -3.9185 | 1.8232  | -2.1069 | C -2.2409                      | 1.6339  | 2.0169  | H 1.2947  | -3.1271 | -1.7904 |
| H -5.3490 | 1.1950  | -1.2601 | C 2.2660                       | -0.5113 | 2.8212  | H -0.1240 | -4.6314 | -0.3658 |
| H -4.1876 | 2.2271  | -0.3892 | C 3.6054                       | -0.5022 | 2.0762  | H 1.4353  | -5.4153 | -0.6998 |
| H -3.6800 | -1.2603 | 0.9724  | C 4.5942                       | -1.5046 | 2.6719  | H 1.1511  | -4.6554 | 0.8859  |

|                           |                           |                           |
|---------------------------|---------------------------|---------------------------|
| H 3.5793 -2.4173 -1.0069  | C 1.8899 -2.8997 3.9718   | H 3.3165 -2.8304 0.3202   |
| H 3.3982 -3.4482 0.4406   | H -0.2682 -1.1221 4.0663  | H 2.2428 -3.9298 1.2367   |
| H 3.4806 -4.1963 -1.1795  | H -0.3625 -2.1620 2.6612  | H 3.1586 -4.5472 -0.1679  |
| C -3.0588 -0.7771 -0.8838 | H 2.1593 -0.7599 3.7276   | H -1.3914 -2.6748 -1.1444 |
| H -2.7758 -1.0172 -1.9190 | H 2.1260 -1.6659 2.2090   | C -3.0353 -0.5636 -1.1091 |
| H -3.3630 0.2796 -0.8361  | H 1.4228 -3.7519 3.4454   | H -3.3384 0.4490 -0.8199  |
| H -0.9591 -2.8612 0.8709  | H 1.4482 -2.8513 4.9822   | H -3.1289 -1.2107 -0.2228 |
| H -3.9488 -1.3806 -0.6320 | H 2.9664 -3.1190 4.0800   | H -1.4817 0.0038 -2.5786  |
|                           | H 3.1392 4.5404 0.3391    | H -3.7473 -0.9259 -1.8740 |
|                           | H 2.9540 3.3451 1.6590    |                           |
| <b>21re-PP-TS(+)-iBu</b>  | H 2.0705 4.8885 1.7289    | <b>12si-PP-TS(-)-iBu</b>  |
| C 0.7689 0.9563 1.8390    | H 0.3402 5.3566 -1.1813   | C -0.5111 -0.8132 1.8290  |
| C -0.1351 -0.0712 2.2251  | H -0.7123 5.2005 0.2516   | C 0.2117 -1.8802 1.2266   |
| C -1.4455 0.3776 1.8585   | H -1.0034 4.1842 -1.1902  | C -0.6704 -2.4747 0.2617  |
| C -1.3213 1.6622 1.1954   | H 3.0297 -1.7029 -3.0982  | C -1.8904 -1.6938 0.2260  |
| C 0.0785 2.0307 1.1763    | H 4.9478 -1.8891 -1.5358  | C -1.8094 -0.6604 1.2388  |
| H 1.8446 0.9205 2.0080    | H 5.2737 -0.2485 0.3010   | H -0.1157 -0.1759 2.6193  |
| Si 0.9563 3.3469 0.1407   | H 3.7354 1.6768 0.5818    | Si -2.8560 0.9161 1.3661  |
| C 1.4524 2.1207 -1.2233   | H -2.8218 -1.0885 2.7170  | C -1.9965 1.7684 -0.0890  |
| C 0.6219 1.7144 -2.3188   | H -4.8372 0.2536 2.1444   | C -2.2004 1.3442 -1.4481  |
| C 1.0636 0.4698 -2.8426   | H -4.6333 2.4278 0.9633   | C -1.1580 1.8160 -2.2787  |
| C 2.2386 0.0892 -2.1252   | H -2.4169 3.3494 0.3428   | C -0.2754 2.5956 -1.4700  |
| C 2.4572 1.0858 -1.0958   | Zr 0.1878 0.1432 -0.4192  | C -0.7738 2.5399 -0.1063  |
| H -0.2550 2.2607 -2.6668  | C 0.7323 -2.0819 -0.1444  | H -3.0258 0.7189 -1.7866  |
| H 0.6239 -0.0626 -3.6850  | H 1.5630 -1.3434 0.1343   | H -1.0753 1.6655 -3.3531  |
| C 2.4212 4.0935 1.0499    | H 0.2032 -2.3524 0.7810   | C -2.5375 1.7595 3.0147   |
| C -0.2173 4.6388 -0.5589  | C -1.6270 -0.6053 -1.6787 | C -4.6759 0.6328 0.9995   |
| C 3.1591 -0.9896 -2.2836  | C -0.9380 -1.8347 -1.6723 | C 0.8877 3.3558 -1.7779   |
| C 4.2227 -1.0835 -1.4164  | H -0.2327 -2.0978 -2.4619 | C 1.5552 3.9901 -0.7511   |
| C 4.4138 -0.1338 -0.3612  | C 1.4329 -3.3208 -0.6980  | C 1.0926 3.9071 0.5999    |
| C 3.5558 0.9290 -0.1960   | C 0.4911 -4.5313 -0.7975  | C -0.0456 3.2042 0.9290   |
| C -2.7317 -0.1366 2.1808  | C 2.6110 -3.6745 0.2274   | C -0.5489 -3.6424 -0.5382 |
| C -3.8443 0.6119 1.8703   | H 1.8336 -3.0932 -1.6988  | C -1.5665 -3.9574 -1.4161 |
| C -3.7248 1.8652 1.1892   | H -0.2709 -4.4140 -1.5834 | C -2.7275 -3.1353 -1.5283 |
| C -2.4972 2.3789 0.8342   | H 1.0741 -5.4356 -1.0308  | C -2.9021 -2.0267 -0.7245 |
| C 0.1681 -1.2757 3.0645   | H -0.0222 -4.6986 0.1629  | C 1.5450 -2.4264 1.6531   |
| C 1.6624 -1.5952 3.2087   |                           |                           |

|    |         |         |         |                         |         |         |         |    |         |         |         |
|----|---------|---------|---------|-------------------------|---------|---------|---------|----|---------|---------|---------|
| C  | 2.2296  | -1.6133 | 2.7533  | C                       | 4.4409  | 0.3328  | -1.1887 | C  | -1.6199 | 0.4594  | 2.7506  |
| C  | 3.6400  | -2.1228 | 3.0486  | H                       | 5.4809  | 0.2432  | -0.8361 | C  | -1.8317 | -0.9950 | 3.1843  |
| H  | 1.3982  | -3.4641 | 2.0071  | H                       | 4.2837  | -0.4294 | -1.9650 | C  | -3.1276 | -1.1685 | 3.9775  |
| H  | 2.2137  | -2.5045 | 0.7815  | H                       | 4.3283  | 1.3273  | -1.6550 | H  | -1.5710 | 1.0944  | 3.6555  |
| H  | 1.6134  | -1.6463 | 3.6682  | H                       | 3.5651  | -0.7970 | 0.4514  | H  | -2.4992 | 0.8157  | 2.1926  |
| H  | 2.2744  | -0.5552 | 2.4467  | C                       | 2.3614  | -2.1879 | -1.7990 | H  | -0.9745 | -1.3154 | 3.8009  |
| H  | 4.2776  | -2.0544 | 2.1494  | H                       | 1.6862  | -2.9353 | -1.3684 | H  | -1.8321 | -1.6520 | 2.2939  |
| H  | 3.6187  | -3.1803 | 3.3622  | H                       | 3.2198  | -2.0452 | -1.1340 | H  | -4.0033 | -0.8802 | 3.3719  |
| H  | 4.1190  | -1.5392 | 3.8505  | H                       | 2.2115  | -0.1577 | -2.6506 | H  | -3.1192 | -0.5307 | 4.8776  |
| H  | -2.8721 | 2.8109  | 2.9899  | H                       | 2.7497  | -2.5991 | -2.7487 | H  | -3.2639 | -2.2125 | 4.3012  |
| H  | -1.4677 | 1.7447  | 3.2824  |                         |         |         |         | H  | 4.3199  | -2.7932 | 1.0751  |
| H  | -3.0924 | 1.2429  | 3.8170  | <b>12re-PP-TS(-)iBu</b> |         |         |         | H  | 3.1311  | -2.2900 | 2.3131  |
| H  | -5.2454 | 1.5624  | 1.1734  | C                       | 0.7429  | -0.2068 | 1.8814  | H  | 4.7300  | -1.5087 | 2.2498  |
| H  | -5.0911 | -0.1544 | 1.6524  | C                       | -0.3572 | 0.6886  | 1.9684  | H  | 5.3149  | -0.1811 | -0.8761 |
| H  | -4.8398 | 0.3342  | -0.0491 | C                       | 0.0823  | 1.9278  | 1.3907  | H  | 5.1285  | 1.0282  | 0.4245  |
| H  | 1.2356  | 3.4352  | -2.8101 | C                       | 1.4671  | 1.7708  | 0.9789  | H  | 4.1479  | 1.1576  | -1.0638 |
| H  | 2.4450  | 4.5845  | -0.9683 | C                       | 1.8756  | 0.4093  | 1.2477  | H  | -1.7224 | -2.9701 | -2.6920 |
| H  | 1.6466  | 4.4329  | 1.3800  | H                       | 0.7159  | -1.2340 | 2.2357  | H  | -2.1773 | -4.4949 | -0.7872 |
| H  | -0.4111 | 3.1790  | 1.9562  | Si                      | 3.2580  | -0.6223 | 0.4508  | H  | -0.6281 | -4.6225 | 1.1528  |
| H  | 0.3258  | -4.2873 | -0.4401 | C                       | 2.1309  | -1.3442 | -0.9025 | H  | 1.4275  | -3.2402 | 1.2397  |
| H  | -1.4939 | -4.8566 | -2.0311 | C                       | 1.8596  | -0.7284 | -2.1669 | H  | -1.6029 | 3.3109  | 1.5688  |
| H  | -3.5061 | -3.4126 | -2.2414 | C                       | 0.6265  | -1.1961 | -2.6954 | H  | -0.3168 | 5.2313  | 0.6539  |
| H  | -3.8214 | -1.4425 | -0.7738 | C                       | 0.1180  | -2.1889 | -1.8015 | H  | 2.0734  | 4.9859  | 0.0194  |
| Zr | -0.2354 | 0.0638  | -0.4952 | C                       | 1.0293  | -2.2646 | -0.6771 | H  | 3.2310  | 2.7990  | 0.1996  |
| C  | 2.0307  | 0.4649  | -0.4064 | H                       | 2.4844  | 0.0350  | -2.6283 | Zr | 0.1599  | 0.1011  | -0.5137 |
| H  | 1.4700  | 0.5917  | 0.5846  | H                       | 0.1826  | -0.9085 | -3.6449 | C  | -2.1051 | -0.0023 | -0.9176 |
| H  | 2.0071  | 1.4358  | -0.9259 | C                       | 3.9181  | -1.9279 | 1.6304  | H  | -1.7025 | -0.7126 | -0.1039 |
| H  | -0.1134 | -0.3657 | -3.2985 | C                       | 4.5833  | 0.4482  | -0.3402 | H  | -2.3172 | -0.6577 | -1.7727 |
| C  | 0.2554  | -1.0233 | -2.5102 | C                       | -1.0504 | -3.0051 | -1.8322 | H  | 0.7697  | 1.7363  | -2.8133 |
| C  | 1.6189  | -0.9272 | -2.1508 | C                       | -1.2942 | -3.8526 | -0.7738 | C  | 0.1374  | 1.9523  | -1.9473 |
| H  | -0.2093 | -2.0130 | -2.4555 | C                       | -0.4040 | -3.9262 | 0.3424  | C  | -1.2512 | 1.7370  | -2.0992 |
| C  | 3.4768  | 0.2040  | 0.0004  | C                       | 0.7360  | -3.1545 | 0.4009  | H  | 0.4484  | 2.7874  | -1.3193 |
| C  | 3.8833  | 1.2394  | 1.0692  | C                       | -0.5666 | 3.1875  | 1.2467  | C  | -3.3947 | 0.5891  | -0.3460 |
| H  | 3.8488  | 2.2560  | 0.6429  | C                       | 0.1559  | 4.2517  | 0.7493  | C  | -4.1575 | -0.5060 | 0.4210  |
| H  | 3.2125  | 1.2170  | 1.9431  | C                       | 1.5316  | 4.1093  | 0.3799  | H  | -4.4642 | -1.3056 | -0.2750 |
| H  | 4.9104  | 1.0400  | 1.4154  | C                       | 2.1809  | 2.8967  | 0.4755  | H  | -3.5411 | -0.9587 | 1.2097  |



|                          |                           |                           |
|--------------------------|---------------------------|---------------------------|
| H -5.0666 -0.0886 0.8844 | C -2.3464 -1.1847 2.0977  | H 5.2228 -1.9141 -1.2156  |
| C -4.3352 1.1739 -1.4106 | C 2.7092 -1.0747 2.1514   | C 3.0414 -2.8982 -2.5485  |
| H -5.2686 1.5035 -0.9268 | C 3.7329 0.0610 2.1114    | H 3.9610 -3.5110 -2.5567  |
| H -3.9138 2.0375 -1.9439 | C 5.1619 -0.4577 2.2955   | H 2.1861 -3.5920 -2.5659  |
| H -4.5985 0.4028 -2.1551 | H 2.7766 -1.5837 3.1362   | H 3.0287 -2.3018 -3.4835  |
| H -3.1270 1.3975 0.3579  | H 2.9754 -1.8434 1.4095   | H 2.9625 -2.6010 -0.4160  |
| C -1.7988 1.3278 -3.4422 | H 3.4983 0.7870 2.9081    | H 0.6782 -3.0397 -0.6400  |
| H -2.7415 0.7710 -3.3932 | H 3.6440 0.6094 1.1614    | C -2.1984 -1.7647 -2.0830 |
| H -1.0568 0.7498 -4.0107 | H 5.4242 -1.1777 1.5030   | H -2.7032 -2.7372 -2.2249 |
| H -1.8983 2.3514 -1.4691 | H 5.2662 -0.9782 3.2615   | H -1.7622 -1.4729 -3.0477 |
| H -1.9946 2.2593 -4.0044 | H 5.8951 0.3613 2.2650    | H 0.3744 -2.5521 -2.4023  |
|                          | H -1.2110 4.7788 1.7631   | H -2.9785 -1.0338 -1.8235 |
| <b>21si-PP-TS(-)iBu</b>  | H 0.1821 3.8490 2.3943    |                           |
| C 0.8227 0.7220 1.9700   | H -1.3353 3.9177 3.3280   | <b>21re-PP-TS(-)iBu</b>   |
| C 1.2868 -0.6272 1.9642  | H -3.9408 3.0294 1.2186   | C 0.4059 -0.1292 1.7990   |
| C 0.1179 -1.4585 1.9941  | H -3.7331 1.9236 2.6034   | C -0.2525 1.1206 1.6836   |
| C -1.0520 -0.6037 2.0074 | H -3.7810 1.2751 0.9365   | C 0.6975 2.0314 1.0987    |
| C -0.6136 0.7795 1.9690  | H 1.7164 1.4232 -3.9243   | C 1.9278 1.3058 0.8548    |
| H 1.4780 1.5863 1.9605   | H 3.6299 2.6691 -2.9479   | C 1.7290 -0.0784 1.2365   |
| Si -1.5645 2.3314 1.4345 | H 3.4555 3.7345 -0.7067   | H -0.0506 -1.0123 2.2409  |
| C -1.0253 2.1861 -0.3799 | H 1.3551 3.6173 0.6036    | Si 2.6920 -1.6426 0.7636  |
| C -1.6829 1.3841 -1.3655 | H 0.8537 -3.5131 2.0920   | C 1.4264 -2.1914 -0.5460  |
| C -0.8033 1.0879 -2.4422 | H -1.4315 -4.4814 2.2516  | C 1.4349 -1.7831 -1.9195  |
| C 0.4288 1.7707 -2.1852  | H -3.4442 -3.0189 2.2859  | C 0.1311 -1.8830 -2.4786  |
| C 0.3095 2.4091 -0.8920  | H -3.2329 -0.5481 2.1292  | C -0.7294 -2.4373 -1.4800 |
| H -2.7065 1.0201 -1.2797 | Zr 0.0748 -0.0408 -0.2644 | C 0.0585 -2.6008 -0.2753  |
| H -1.0475 0.5280 -3.3336 | C 1.8933 -0.9788 -1.3632  | H 2.3058 -1.3874 -2.4451  |
| C -0.9154 3.8606 2.3069  | H 2.1403 -0.1382 -0.6162  | H -0.1536 -1.6450 -3.5030 |
| C -3.4304 2.1133 1.5584  | H 1.8272 -0.5237 -2.3608  | C 2.8625 -2.8457 2.1949   |
| C 1.6375 1.8771 -2.9331  | C -1.1422 -1.8975 -0.9993 | C 4.3236 -1.2297 -0.0773  |
| C 2.6994 2.5674 -2.3818  | C 0.1321 -2.4084 -1.3439  | C -2.1072 -2.7946 -1.4930 |
| C 2.5957 3.1809 -1.0970  | H -1.5246 -2.2643 -0.0469 | C -2.6740 -3.2892 -0.3374 |
| C 1.4314 3.1144 -0.3585  | C 3.0448 -1.9729 -1.3226  | C -1.9046 -3.4535 0.8570  |
| C -0.0298 -2.8735 2.0749 | C 4.3779 -1.2069 -1.2725  | C -0.5673 -3.1225 0.8975  |
| C -1.2992 -3.3990 2.1674 | H 4.4977 -0.5984 -2.1925  | C 0.6532 3.4425 0.9346    |
| C -2.4538 -2.5583 2.1906 | H 4.4298 -0.5292 -0.4069  | C 1.8201 4.1063 0.6142    |







|                           |                           |                           |
|---------------------------|---------------------------|---------------------------|
| H -3.9453 -3.7593 1.2132  | H -0.5052 0.1236 2.6715   | H 1.0813 5.0336 -1.2611   |
| H -5.2436 -1.8693 0.2598  | Si -3.2611 0.2528 1.0403  | H 0.0682 4.8957 1.0038    |
| H -4.2671 0.4022 0.0917   | C -2.4930 1.1653 -0.4294  | H -1.6227 3.1690 1.5490   |
| Zr -0.0983 0.0369 -0.4808 | C -2.4017 0.5665 -1.7339  | H 1.4235 -3.9737 0.2323   |
| C 1.8066 -1.2531 -0.3023  | C -1.4331 1.2315 -2.5204  | H 0.0427 -5.1973 -1.4298  |
| H 1.8752 -0.2171 0.1812   | C -0.9058 2.3085 -1.7438  | H -2.2454 -4.4196 -2.0113 |
| H 1.5399 -1.9710 0.4856   | C -1.5361 2.2492 -0.4360  | H -3.2687 -2.4857 -0.8504 |
| C -0.8048 -1.4912 -2.0975 | H -2.9753 -0.2999 -2.0613 | Zr -0.2962 0.0054 -0.4452 |
| C 0.5400 -1.9151 -2.0787  | H -1.1789 1.0041 -3.5535  | C 1.7440 1.0462 -0.2029   |
| H 1.2857 -1.4939 -2.7543  | C -3.3941 1.3130 2.5859   | H 1.0508 1.1055 0.7073    |
| C 3.2019 -1.5747 -0.8259  | C -4.8733 -0.5756 0.5491  | H 1.5205 1.9123 -0.8456   |
| C 3.3630 -3.0570 -1.1950  | C 0.0336 3.3353 -2.0412   | H 0.2878 -0.6499 -3.1448  |
| C 4.2295 -1.2104 0.2622   | C 0.3683 4.2339 -1.0500   | C 0.7211 -1.0917 -2.2464  |
| H 3.4059 -0.9577 -1.7157  | C -0.2188 4.1577 0.2521   | C 1.9502 -0.5732 -1.7796  |
| H 2.7889 -3.3416 -2.0887  | C -1.1529 3.1947 0.5652   | H 0.5421 -2.1624 -2.1049  |
| H 4.4236 -3.2734 -1.4004  | C 0.4250 -3.6199 -0.0293  | C 3.1437 1.2529 0.3651    |
| H 3.0457 -3.7002 -0.3549  | C -0.3496 -4.2998 -0.9475 | C 3.1144 2.4631 1.3213    |
| H 4.1555 -0.1485 0.5436   | C -1.6678 -3.8606 -1.2726 | H 2.8564 3.3790 0.7637    |
| H 4.0614 -1.8191 1.1670   | C -2.2382 -2.7738 -0.6408 | H 2.3717 2.3371 2.1255    |
| H 5.2520 -1.4077 -0.0998  | C 1.8153 -1.6414 2.1655   | H 4.1053 2.6023 1.7832    |
| H 0.7527 -2.9177 -1.7036  | C 2.1082 -0.5601 3.2073   | C 4.1763 1.5327 -0.7373   |
| C -1.8710 -2.5089 -1.7515 | C 3.5558 -0.6115 3.6948   | H 5.1486 1.7809 -0.2823   |
| C -2.1714 -3.4156 -2.9546 | H 1.9152 -2.6366 2.6378   | H 4.3320 0.6837 -1.4178   |
| H -2.7974 -2.0125 -1.4340 | H 2.5832 -1.6115 1.3766   | H 3.8548 2.4012 -1.3386   |
| H -1.5327 -3.1175 -0.9010 | H 1.4153 -0.6764 4.0583   | H 3.4457 0.3697 0.9500    |
| H -2.5173 -2.8220 -3.8186 | H 1.8994 0.4302 2.7697    | C 2.9659 -1.5239 -1.2064  |
| H -1.2685 -3.9689 -3.2662 | H 4.2574 -0.4537 2.8565   | C 3.8431 -2.0474 -2.3591  |
| H -1.0693 -0.8080 -2.9138 | H 3.7860 -1.5937 4.1414   | H 2.4534 -2.3672 -0.7273  |
| H -2.9585 -4.1470 -2.7058 | H 3.7527 0.1623 4.4535    | H 3.6123 -1.0566 -0.4550  |
|                           | H -3.9979 2.2164 2.3926   | H 3.2304 -2.5592 -3.1186  |
| <b>12si-BT-TS(-)iBu</b>   | H -2.4032 1.6325 2.9500   | H 4.3797 -1.2195 -2.8536  |
| C -0.6092 -0.6762 1.9390  | H -3.8819 0.7422 3.3950   | H 2.3670 0.2797 -2.3198   |
| C 0.4476 -1.5459 1.5507   | H -5.6926 0.1643 0.5465   | H 4.5921 -2.7582 -1.9748  |
| C -0.1104 -2.4620 0.5957  | H -5.1352 -1.3791 1.2591  |                           |
| C -1.4833 -2.0713 0.3462  | H -4.8169 -1.0123 -0.4617 |                           |
| C -1.8155 -0.9620 1.2175  | H 0.4725 3.4071 -3.0388   |                           |

**12re-BT-TS(-)iBu**

C -1.2378 0.6916 1.6547  
C -0.0023 0.2321 2.1855  
C -0.0189 -1.1993 2.0703  
C -1.2901 -1.5929 1.4862  
C -2.0463 -0.3979 1.1818  
H -1.5200 1.7398 1.5999  
Si -3.4385 -0.1327 -0.0839  
C -2.2580 0.3911 -1.4821  
C -1.6025 -0.5037 -2.3884  
C -0.4293 0.0958 -2.9203  
C -0.3542 1.4305 -2.4143  
C -1.4665 1.6095 -1.5025  
H -1.9284 -1.5222 -2.5939  
H 0.2514 -0.3500 -3.6409  
C -4.6056 1.2420 0.4454  
C -4.2941 -1.7379 -0.5521  
C 0.5766 2.4895 -2.6246  
C 0.3999 3.6723 -1.9405  
C -0.6901 3.8527 -1.0333  
C -1.6097 2.8509 -0.8110  
C 0.9176 -2.1924 2.4770  
C 0.5751 -3.5213 2.3404  
C -0.6926 -3.9114 1.8018  
C -1.6089 -2.9767 1.3681  
C 0.9890 1.0606 2.9537  
C 0.7685 2.5721 2.8318  
C 1.8019 3.3636 3.6345  
H 0.9055 0.7761 4.0198  
H 2.0208 0.8081 2.6653  
H -0.2458 2.8181 3.1899  
H 0.7978 2.8671 1.7658  
H 2.8242 3.1554 3.2764  
H 1.7586 3.0867 4.7014  
H 1.6261 4.4482 3.5567  
H -5.0748 1.7197 -0.4322

H -4.0777 2.0200 1.0220  
H -5.4073 0.8374 1.0873  
H -5.0269 -1.5606 -1.3584  
H -4.8343 -2.1621 0.3119  
H -3.5702 -2.4902 -0.9078  
H 1.3982 2.3660 -3.3330  
H 1.0955 4.4987 -2.0999  
H -0.8008 4.8116 -0.5232  
H -2.4574 3.0074 -0.1430  
H 1.8674 -1.8984 2.9291  
H 1.2696 -4.2972 2.6685  
H -0.9340 -4.9743 1.7403  
H -2.5753 -3.2824 0.9667  
Zr -0.1279 -0.2120 -0.3758  
C 2.0862 0.3981 -0.5479  
H 1.3751 1.1905 -0.1061  
H 2.3103 0.7642 -1.5586  
H 0.1325 -2.6193 -1.9477  
C 0.6091 -2.3444 -1.0023  
C 1.9121 -1.8021 -1.0764  
H 0.3780 -2.9758 -0.1441  
C 3.3343 0.4270 0.3358  
C 3.6536 1.8847 0.7134  
H 3.9024 2.4604 -0.1946  
H 2.8033 2.3759 1.2060  
H 4.5214 1.9247 1.3924  
C 4.5794 -0.1812 -0.3275  
H 5.4460 -0.0485 0.3399  
H 4.4846 -1.2552 -0.5404  
H 4.8032 0.3404 -1.2741  
H 3.1231 -0.1428 1.2584  
C 2.6246 -1.7433 -2.4041  
H 3.3314 -0.9063 -2.4697  
H 1.8873 -1.6271 -3.2133  
H 2.5421 -1.9592 -0.1979  
C 3.3927 -3.0635 -2.5981

H 2.7078 -3.9265 -2.5701  
H 4.1475 -3.1990 -1.8046  
H 3.9140 -3.0602 -3.5685

**21si-BT-TS(-)iBu**

C -0.0831 0.7149 1.9588  
C 0.5538 -0.5520 2.0596  
C -0.4561 -1.5392 1.8014  
C -1.7037 -0.8520 1.5285  
C -1.4671 0.5757 1.5881  
H 0.4257 1.6626 2.1122  
Si -2.4621 1.9887 0.7905  
C -1.3911 2.0406 -0.7810  
C -1.5830 1.2331 -1.9508  
C -0.3628 1.1008 -2.6671  
C 0.6210 1.8983 -2.0052  
C -0.0001 2.4584 -0.8234  
H -2.5144 0.7437 -2.2220  
H -0.2170 0.5597 -3.5992  
C -2.3808 3.5609 1.8142  
C -4.2093 1.4635 0.3422  
C 1.9935 2.1591 -2.2870  
C 2.7130 2.9430 -1.4110  
C 2.1091 3.4923 -0.2387  
C 0.7828 3.2623 0.0586  
C -0.4149 -2.9608 1.8394  
C -1.5867 -3.6606 1.6410  
C -2.8237 -2.9850 1.3929  
C -2.8914 -1.6102 1.3215  
C 1.9529 -0.8155 2.5401  
C 2.8361 0.4340 2.6071  
C 4.2534 0.1059 3.0769  
H 1.8927 -1.2669 3.5483  
H 2.4344 -1.5791 1.9066  
H 2.3758 1.1654 3.2936  
H 2.8613 0.9223 1.6144

|    |         |         |         |   |         |         |         |    |         |         |         |
|----|---------|---------|---------|---|---------|---------|---------|----|---------|---------|---------|
| H  | 4.7399  | -0.6101 | 2.3929  | C | -3.2963 | -1.8510 | -2.4198 | H  | 1.3470  | -1.7315 | 3.6885  |
| H  | 4.2340  | -0.3509 | 4.0807  | H | -1.6010 | -2.8600 | -3.2802 | H  | 1.2427  | -2.5435 | 2.1363  |
| H  | 4.8800  | 1.0105  | 3.1263  | H | -1.4762 | -1.1070 | -3.3492 | H  | 3.3608  | -0.4738 | 2.9632  |
| H  | -2.6298 | 4.4445  | 1.2012  | H | -3.6359 | -2.7456 | -1.8715 | H  | 3.2596  | -1.1652 | 1.3443  |
| H  | -1.3809 | 3.7129  | 2.2531  | H | -3.5426 | -0.9794 | -1.7894 | H  | 3.5982  | -3.4883 | 2.3234  |
| H  | -3.1038 | 3.5035  | 2.6467  | H | 0.8545  | -2.5286 | -2.4227 | H  | 3.6879  | -2.7768 | 3.9534  |
| H  | -4.7367 | 2.2920  | -0.1615 | H | -3.8757 | -1.7792 | -3.3539 | H  | 4.9517  | -2.4067 | 2.7504  |
| H  | -4.7849 | 1.1922  | 1.2440  |   |         |         |         | H  | 1.8653  | 5.2250  | 0.4895  |
| H  | -4.2071 | 0.5966  | -0.3396 |   |         |         |         | H  | 2.4498  | 3.9111  | 1.5525  |
| H  | 2.4531  | 1.7636  | -3.1952 |   |         |         |         | H  | 1.1381  | 4.9807  | 2.1058  |
| H  | 3.7618  | 3.1651  | -1.6188 |   |         |         |         | H  | -1.2637 | 5.0175  | -0.5095 |
| H  | 2.7096  | 4.1218  | 0.4207  |   |         |         |         | H  | -1.8405 | 4.5126  | 1.1017  |
| H  | 0.3245  | 3.7141  | 0.9386  |   |         |         |         | H  | -2.1080 | 3.4543  | -0.3124 |
| H  | 0.5197  | -3.4782 | 2.0663  |   |         |         |         | H  | 2.9199  | -0.8795 | -3.4372 |
| H  | -1.5827 | -4.7513 | 1.6924  |   |         |         |         | H  | 5.0188  | -0.7494 | -2.1198 |
| H  | -3.7310 | -3.5782 | 1.2631  |   |         |         |         | H  | 5.2778  | 0.9051  | -0.2812 |
| H  | -3.8391 | -1.1047 | 1.1380  |   |         |         |         | H  | 3.4408  | 2.4558  | 0.3081  |
| Zr | -0.1293 | -0.0480 | -0.3771 |   |         |         |         | H  | -1.4003 | -2.3518 | 2.8779  |
| C  | 1.8902  | -0.9326 | -1.1042 |   |         |         |         | H  | -3.7545 | -1.6070 | 3.1716  |
| H  | 1.9193  | -0.1152 | -0.3002 |   |         |         |         | H  | -4.4388 | 0.7152  | 2.6163  |
| H  | 2.0107  | -0.4415 | -2.0790 |   |         |         |         | H  | -2.8137 | 2.3457  | 1.6948  |
| C  | -0.9909 | -2.0011 | -1.3999 |   |         |         |         | Zr | 0.2037  | 0.1299  | -0.3796 |
| C  | 0.3969  | -2.3805 | -1.4404 |   |         |         |         | C  | 0.7474  | -2.0428 | -0.9482 |
| H  | -1.5311 | -2.5888 | -0.6499 |   |         |         |         | H  | 1.4523  | -1.4221 | -0.2814 |
| C  | 3.1174  | -1.7978 | -0.8134 |   |         |         |         | H  | 1.1479  | -1.9201 | -1.9659 |
| C  | 4.3182  | -0.8779 | -0.5334 |   |         |         |         | C  | -1.8075 | -0.4779 | -1.3983 |
| H  | 4.5532  | -0.2774 | -1.4289 |   |         |         |         | C  | -1.2443 | -1.8171 | -1.3527 |
| H  | 4.1180  | -0.1882 | 0.2998  |   |         |         |         | C  | 1.0847  | -3.4594 | -0.4962 |
| H  | 5.2065  | -1.4791 | -0.2810 |   |         |         |         | C  | 2.6102  | -3.6323 | -0.4929 |
| C  | 3.4594  | -2.7403 | -1.9762 |   |         |         |         | H  | 3.0096  | -3.4982 | -1.5128 |
| H  | 4.4287  | -3.2270 | -1.7839 |   |         |         |         | H  | 3.1031  | -2.9043 | 0.1677  |
| H  | 2.7111  | -3.5334 | -2.1190 |   |         |         |         | H  | 2.8731  | -4.6458 | -0.1496 |
| H  | 3.5500  | -2.1696 | -2.9176 |   |         |         |         | C  | 0.4388  | -4.5064 | -1.4154 |
| H  | 2.9191  | -2.4057 | 0.0866  |   |         |         |         | H  | 0.7676  | -5.5164 | -1.1238 |
| H  | 0.7656  | -3.0429 | -0.6523 |   |         |         |         | H  | -0.6603 | -4.4803 | -1.3674 |
| C  | -1.7929 | -1.9372 | -2.7008 |   |         |         |         | H  | 0.7467  | -4.3397 | -2.4633 |

**21re-BT-TS(-)iBu**

|                                |                            |                                |
|--------------------------------|----------------------------|--------------------------------|
| H 0.7009 -3.6149 0.5267        | C -0.2553 -3.6213 0.1495   | H 2.1553 0.8179 -1.9954        |
| H -1.6365 -2.4686 -0.5618      | C 0.5130 0.3637 3.1670     | C 1.4831 2.9370 -0.5237        |
| H -1.0365 -2.3412 -2.2889      | C -0.2303 1.6820 3.4074    | C 2.9965 3.1117 -0.7107        |
| C -3.1625 -0.2985 -0.7351      | C 0.5698 2.6330 4.2978     | C 0.9753 4.0518 0.4115         |
| C -4.2904 -0.8921 -1.5940      | H 0.6289 -0.1650 4.1319    | H 0.9990 3.0587 -1.5055        |
| H -3.3578 0.7715 -0.5605       | H 1.5459 0.5724 2.8322     | H 3.4341 2.3981 -1.4235        |
| H -3.1555 -0.7847 0.2489       | H -1.2094 1.4652 3.8688    | H 3.1939 4.1271 -1.0902        |
| H -4.3167 -0.4191 -2.5905      | H -0.4421 2.1710 2.4407    | H 3.5251 3.0091 0.2527         |
| H -4.1409 -1.9762 -1.7360      | H 1.5344 2.8900 3.8254     | H -0.1157 3.9976 0.5471        |
| H -1.7895 -0.0464 -2.4042      | H 0.7891 2.1687 5.2743     | H 1.4528 3.9605 1.4029         |
| H -5.2698 -0.7379 -1.1123      | H 0.0200 3.5696 4.4813     | H 1.2284 5.0430 -0.0003        |
|                                | H -5.6617 -0.8722 -0.0207  | C 4.5434 -0.4722 -1.2135       |
| <b>12si-HX-TS(+)<i>i</i>Bu</b> | H -4.7120 -0.4550 1.4380   | C 5.8159 -0.6170 -0.3746       |
| C -1.5230 -0.5541 1.7969       | H -5.3165 -2.1136 1.2187   | H 4.7011 0.2961 -1.9935        |
| C -0.1565 -0.5628 2.1946       | H -4.4073 -3.3679 -1.7386  | H 4.3310 -1.4188 -1.7413       |
| C 0.4299 -1.7349 1.6138        | H -3.5461 -4.2211 -0.4273  | C 7.0295 -0.9956 -1.2253       |
| C -0.5840 -2.4089 0.8252       | H -2.6352 -3.5442 -1.8099  | H 6.0080 0.3338 0.1559         |
| C -1.8227 -1.6713 0.9410       | H -0.8045 3.5306 -2.6854   | H 5.6470 -1.3819 0.4059        |
| H -2.2379 0.2141 2.0886        | H -2.0921 4.8817 -1.0565   | H 6.8614 -1.9551 -1.7448       |
| Si -3.3274 -1.7413 -0.2117     | H -3.6387 3.8086 0.5674    | H 7.2244 -0.2273 -1.9936       |
| C -2.6592 -0.4040 -1.3832      | H -4.0133 1.3600 0.5433    | H 7.9363 -1.0968 -0.6075       |
| C -1.7151 -0.6181 -2.4400      | H 2.4688 -1.8325 2.3906    |                                |
| C -1.0507 0.5949 -2.7690       | H 2.9780 -3.9614 1.2162    | <b>12re-HX-TS(+)<i>i</i>Bu</b> |
| C -1.6281 1.6335 -1.9731       | H 1.2667 -5.0881 -0.1912   | C -2.5269 0.7320 0.1876        |
| C -2.5855 1.0109 -1.0792       | H -1.0094 -4.1433 -0.4391  | C -1.9893 1.1865 1.4203        |
| H -1.4988 -1.5868 -2.8904      | Zr -0.4126 -0.1200 -0.3672 | C -1.7676 0.0230 2.2256        |
| H -0.2995 0.7271 -3.5457       | C 1.0560 1.5905 0.0633     | C -2.1548 -1.1446 1.4522       |
| C -4.8993 -1.2403 0.6874       | H -0.0364 1.7597 0.3900    | C -2.6520 -0.7003 0.1686       |
| C -3.4863 -3.3724 -1.1302      | H 1.6023 1.3921 0.9956     | H -2.8008 1.3865 -0.6390       |
| C -1.4659 3.0491 -1.9635       | H 0.9701 -1.2397 -2.5343   | Si -2.8625 -1.6756 -1.4414     |
| C -2.1909 3.7945 -1.0612       | C 1.3551 -1.1186 -1.5187   | C -1.0543 -1.4517 -1.9739      |
| C -3.0857 3.1785 -0.1318       | C 2.1159 0.0402 -1.2293    | C 0.0154 -2.2582 -1.4633       |
| C -3.2891 1.8163 -0.1313       | H 1.6306 -2.0368 -0.9930   | C 1.2581 -1.5950 -1.6121       |
| C 1.7227 -2.3100 1.7528        | C 3.3321 -0.0846 -0.3478   | C 1.0112 -0.3510 -2.2709       |
| C 1.9964 -3.4964 1.1045        | H 3.1574 -0.8662 0.4042    | C -0.4247 -0.2464 -2.4719      |
| C 1.0112 -4.1461 0.2980        | H 3.5661 0.8465 0.1812     | H -0.1164 -3.2273 -0.9817      |



|                           |                                |                           |
|---------------------------|--------------------------------|---------------------------|
| H 2.2283 -1.9860 -1.3195  | C 1.0775 1.5914 0.4698         | C -0.8395 1.4268 1.8392   |
| C -4.0862 -0.8203 -2.5809 | H 0.3658 1.6919 -0.4279        | C 0.1613 2.1636 1.0981    |
| C -3.2254 -3.4973 -1.1627 | H 0.5457 1.9989 1.3410         | H 2.3716 1.7906 0.9707    |
| C 1.8751 0.6847 -2.7371   | H 1.4522 -2.2765 1.0871        | Si -0.0643 3.3231 -0.3885 |
| C 1.3193 1.7833 -3.3517   | C 1.1775 -1.3274 1.5511        | C 0.1613 1.9445 -1.6806   |
| C -0.0964 1.9129 -3.5119  | C 2.0662 -0.2336 1.4130        | C -0.8840 1.0912 -2.1589  |
| C -0.9609 0.9299 -3.0830  | H 0.6042 -1.3974 2.4772        | C -0.3488 -0.1285 -2.6542 |
| C -1.3119 -0.1215 3.5645  | C 2.2492 2.5174 0.1588         | C 1.0779 -0.0328 -2.5856  |
| C -1.2256 -1.3906 4.1011  | C 2.9989 2.9293 1.4343         | C 1.3960 1.2298 -1.9489   |
| C -1.5685 -2.5467 3.3333  | C 1.7199 3.7940 -0.5237        | H -1.9442 1.3213 -2.0926  |
| C -2.0173 -2.4409 2.0330  | H 2.9389 2.0174 -0.5394        | H -0.9122 -0.9456 -3.0989 |
| C -1.8267 2.6101 1.8644   | H 3.4310 2.0811 1.9845         | C 1.2695 4.6429 -0.4512   |
| C -1.8227 3.6334 0.7239   | H 3.8202 3.6186 1.1807         | C -1.8121 4.0043 -0.5111  |
| C -1.5170 5.0447 1.2251   | H 2.3117 3.4616 2.1155         | C 2.1254 -0.8944 -3.0213  |
| H -2.6452 2.8530 2.5678   | H 1.1695 3.5573 -1.4469        | C 3.4310 -0.5159 -2.7983  |
| H -0.9022 2.7148 2.4634   | H 1.0405 4.3372 0.1545         | C 3.7499 0.7087 -2.1343   |
| H -2.8044 3.6161 0.2196   | H 2.5590 4.4633 -0.7758        | C 2.7619 1.5716 -1.7136   |
| H -1.0757 3.3381 -0.0328  | C 3.3412 -0.3326 0.5921        | C -0.9370 -0.5324 3.3793  |
| H -0.5218 5.0821 1.7025   | C 4.0764 -1.6715 0.7513        | C -2.2876 -0.2963 3.5341  |
| H -2.2585 5.3670 1.9755   | H 4.0217 0.4787 0.8842         | C -2.9365 0.7817 2.8523   |
| H -1.5259 5.7749 0.4004   | H 3.1290 -0.1711 -0.4731       | C -2.2408 1.6264 2.0128   |
| H -3.9581 -1.1587 -3.6237 | C 5.3775 -1.6968 -0.0538       | C 2.2739 -0.5067 2.8153   |
| H -3.9692 0.2760 -2.5561  | H 4.2891 -1.8585 1.8186        | C 3.6138 -0.4791 2.0714   |
| H -5.1191 -1.0522 -2.2679 | H 3.4301 -2.5029 0.4178        | C 4.6076 -1.4852 2.6519   |
| H -3.3812 -4.0057 -2.1300 | C 6.1138 -3.0314 0.0770        | H 2.4389 -0.1981 3.8648   |
| H -4.1379 -3.6278 -0.5556 | H 5.1464 -1.4957 -1.1174       | H 1.9052 -1.5470 2.8826   |
| H -2.3930 -4.0045 -0.6469 | H 6.0294 -0.8704 0.2831        | H 4.0348 0.5401 2.1238    |
| H 2.9571 0.5843 -2.6355   | H 7.0472 -3.0340 -0.5081       | H 3.4507 -0.6928 1.0004   |
| H 1.9672 2.5755 -3.7313   | H 6.3711 -3.2348 1.1308        | H 4.2141 -2.5138 2.5705   |
| H -0.4926 2.8031 -4.0042  | H 5.4843 -3.8647 -0.2818       | H 4.7950 -1.2826 3.7201   |
| H -2.0357 1.0195 -3.2421  | H 2.0909 0.4630 2.2540         | H 5.5732 -1.4472 2.1231   |
| H -1.0634 0.7601 4.1589   |                                | H 1.3437 5.0804 -1.4619   |
| H -0.8962 -1.5217 5.1338  | <b>21si-HX-TS(+)<i>i</i>Bu</b> | H 2.2580 4.2408 -0.1735   |
| H -1.4865 -3.5314 3.7975  | C 1.4059 1.4953 1.3753         | H 1.0287 5.4532 0.2590    |
| H -2.3080 -3.3274 1.4682  | C 1.2121 0.3726 2.2236         | H -1.9036 4.6563 -1.3970  |
| Zr -0.2289 -0.2451 0.0350 | C -0.1871 0.3279 2.5300        | H -2.0676 4.6029 0.3802   |

|                           |                           |                           |
|---------------------------|---------------------------|---------------------------|
| H -2.5555 3.1951 -0.6075  | H -5.2029 -1.3576 -2.4992 | H 2.1756 -0.7413 3.7106   |
| H 1.8913 -1.8215 -3.5465  | H -7.5962 -1.7250 -1.8088 | H 2.1374 -1.6471 2.1923   |
| H 4.2453 -1.1558 -3.1442  | H -6.5759 -3.0729 -1.2374 | H 1.4568 -3.7363 3.4337   |
| H 4.7986 0.9713 -1.9829   | H -7.1004 -1.8077 -0.0964 | H 1.4914 -2.8353 4.9695   |
| H 3.0132 2.5239 -1.2462   | H -0.9793 -2.8892 0.8231  | H 3.0017 -3.0949 4.0551   |
| H -0.4401 -1.3389 3.9224  |                           | H 3.1085 4.5757 0.3417    |
| H -2.8774 -0.9317 4.1978  | <b>21re-HX-TS(+)</b> iBu  | H 2.9279 3.3733 1.6553    |
| H -4.0046 0.9401 3.0138   | C 0.7665 0.9619 1.8308    | H 2.0268 4.9055 1.7274    |
| H -2.7413 2.4573 1.5159   | C -0.1305 -0.0651 2.2256  | H 0.3023 5.3259 -1.2351   |
| Zr 0.0921 0.0205 -0.1229  | C -1.4472 0.3783 1.8655   | H -0.7479 5.1859 0.2021   |
| C 1.0757 -2.0418 0.0619   | C -1.3288 1.6608 1.2032   | H -1.0236 4.1308 -1.2131  |
| H 1.7840 -1.1781 -0.2088  | C 0.0689 2.0339 1.1692    | H 3.0453 -1.7149 -3.0717  |
| H 1.2079 -2.2273 1.1372   | H 1.8417 0.9300 2.0007    | H 4.9494 -1.9007 -1.4947  |
| C -1.9517 -1.0794 0.1235  | Si 0.9416 3.3502 0.1288   | H 5.2719 -0.2456 0.3318   |
| C -1.1921 -2.2545 -0.0375 | C 1.4644 2.1223 -1.2230   | H 3.7401 1.6851 0.5906    |
| H -2.2165 -0.8648 1.1620  | C 0.6428 1.7147 -2.3245   | H -2.8148 -1.0926 2.7269  |
| H -1.1614 -2.7511 -1.0112 | C 1.0844 0.4686 -2.8415   | H -4.8351 0.2432 2.1725   |
| C 1.5571 -3.2514 -0.7287  | C 2.2522 0.0850 -2.1137   | H -4.6452 2.4215 0.9952   |
| C 0.9340 -4.5636 -0.2299  | C 2.4667 1.0853 -1.0851   | H -2.4360 3.3499 0.3635   |
| C 3.0897 -3.3397 -0.5956  | H -0.2324 2.2602 -2.6785  | Zr 0.1968 0.1427 -0.4254  |
| H 1.3034 -3.1098 -1.7927  | H 0.6505 -0.0670 -3.6838  | C 0.7140 -2.0900 -0.1567  |
| H -0.1457 -4.6301 -0.4256 | C 2.3910 4.1179 1.0447    | H 1.5487 -1.3606 0.1315   |
| H 1.4179 -5.4168 -0.7314  | C -0.2463 4.6123 -0.5963  | H 0.1721 -2.3552 0.7616   |
| H 1.0980 -4.6762 0.8568   | C 3.1689 -0.9965 -2.2596  | C -1.6221 -0.5824 -1.6957 |
| H 3.5772 -2.4246 -0.9651  | C 4.2278 -1.0889 -1.3855  | C -0.9454 -1.8195 -1.6967 |
| H 3.3716 -3.4788 0.4627   | C 4.4160 -0.1341 -0.3368  | H -0.2430 -2.0907 -2.4861 |
| H 3.4739 -4.1999 -1.1684  | C 3.5625 0.9348 -0.1798   | C 1.4030 -3.3316 -0.7118  |
| C -3.0720 -0.7346 -0.8481 | C -2.7277 -0.1419 2.1969  | C 0.4496 -4.5305 -0.8254  |
| C -4.3410 -1.5377 -0.5257 | C -3.8450 0.6071 1.8923   | C 2.5713 -3.7019 0.2211   |
| H -2.7715 -0.9372 -1.8882 | C -3.7352 1.8599 1.2162   | H 1.8141 -3.1027 -1.7081  |
| H -3.3146 0.3391 -0.7788  | C -2.5089 2.3779 0.8516   | H -0.3073 -4.4038 -1.6130 |
| C -5.5071 -1.1831 -1.4503 | C 0.1855 -1.2720 3.0594   | H 1.0253 -5.4392 -1.0632  |
| H -4.1146 -2.6174 -0.6039 | C 1.6798 -1.5815 3.1941   | H -0.0690 -4.7031 0.1345  |
| H -4.6293 -1.3548 0.5258  | C 1.9252 -2.8835 3.9564   | H 3.2869 -2.8706 0.3164   |
| C -6.7675 -1.9907 -1.1330 | H -0.2444 -1.1191 4.0672  | H 2.1941 -3.9487 1.2282   |
| H -5.7207 -0.1014 -1.3638 | H -0.3450 -2.1583 2.6617  | H 3.1060 -4.5827 -0.1710  |

|                           |                            |                            |
|---------------------------|----------------------------|----------------------------|
| H -1.4088 -2.6538 -1.1672 | C -2.7428 2.5436 0.0079    | H 1.3489 -1.8488 -1.6246   |
| C -3.0146 -0.5396 -1.1030 | C 1.4277 -3.0723 0.5987    | C 1.9285 2.4984 0.6773     |
| C -4.0618 -1.0663 -2.0972 | C 1.1582 -4.0730 -0.3132   | C 1.2593 3.6598 1.4410     |
| H -3.2855 0.4843 -0.8137  | C -0.1438 -4.2302 -0.8755  | H 0.7737 4.3492 0.7302     |
| H -3.0394 -1.1431 -0.1846 | C -1.1951 -3.4242 -0.4873  | H 0.4899 3.3034 2.1446     |
| C -5.4890 -1.0024 -1.5392 | C 1.5184 -0.5451 2.6650    | H 2.0168 4.2217 2.0112     |
| H -3.9988 -0.4787 -3.0308 | C 1.1746 0.6354 3.5752     | C 2.9550 3.0907 -0.3002    |
| H -3.8127 -2.1111 -2.3639 | C 2.4140 1.2103 4.2603     | H 3.6548 3.7438 0.2453     |
| C -5.6992 -1.9013 -0.3163 | H 1.9073 -1.3771 3.2815    | H 3.5484 2.3299 -0.8268    |
| H -5.7273 0.0455 -1.2775  | H 2.3450 -0.2649 1.9934    | H 2.4383 3.7080 -1.0559    |
| H -6.1953 -1.2943 -2.3350 | H 0.4379 0.3114 4.3302     | H 2.4362 1.8587 1.4163     |
| H -6.7500 -1.8824 0.0157  | H 0.6828 1.4214 2.9784     | C 3.1287 -0.2197 -0.4985   |
| H -5.4382 -2.9487 -0.5521 | H 3.1402 1.5767 3.5131     | C 4.3476 -0.4277 -1.4153   |
| H -5.0731 -1.5801 0.5333  | H 2.9204 0.4411 4.8677     | H 2.9042 -1.1606 0.0187    |
| H -1.4883 0.0256 -2.5987  | H 2.1542 2.0510 4.9228     | H 3.3951 0.5230 0.2618     |
|                           | H -5.2698 0.6344 1.5438    | C 5.5839 -0.8641 -0.6253   |
| <b>12si-HX-TS(-)iBu</b>   | H -3.7043 0.7886 2.3925    | H 4.1063 -1.1826 -2.1843   |
| C -1.0051 -0.6635 1.9728  | H -4.7779 -0.5887 2.7494   | H 4.5665 0.5130 -1.9544    |
| C 0.3574 -1.0569 1.8600   | H -5.6708 -2.0575 -0.2123  | C 6.8056 -1.0621 -1.5246   |
| C 0.3818 -2.1879 0.9751   | H -4.7002 -3.1864 0.7798   | H 5.8034 -0.1059 0.1490    |
| C -0.9648 -2.4058 0.4862  | H -4.2401 -2.8494 -0.9148  | H 5.3547 -1.8029 -0.0875   |
| C -1.8532 -1.4652 1.1390  | H -0.6975 3.1308 -3.3310   | H 7.6851 -1.3798 -0.9418   |
| H -1.3542 0.1613 2.5931   | H -1.1010 4.9901 -1.7322   | H 6.6082 -1.8310 -2.2916   |
| Si -3.5974 -0.9563 0.5952 | H -2.3770 4.6205 0.3679    | H 7.0634 -0.1246 -2.0473   |
| C -2.9876 0.0785 -0.8677  | H -3.3372 2.4022 0.9112    | H 2.0933 1.1000 -1.9258    |
| C -2.4352 -0.5260 -2.0501 | H 2.4194 -2.9714 1.0426    |                            |
| C -1.6732 0.4144 -2.7807  | H 1.9480 -4.7676 -0.6060   | <b>12re-HX-TS(-)iBu</b>    |
| C -1.7550 1.6665 -2.0976  | H -0.3148 -5.0277 -1.6011  | C -2.3382 0.2910 0.9971    |
| C -2.5406 1.4533 -0.8941  | H -2.1998 -3.5941 -0.8754  | C -1.3571 0.7804 1.9011    |
| H -2.5588 -1.5720 -2.3288 | Zr -0.5503 -0.0905 -0.4172 | C -0.6563 -0.3695 2.4002   |
| H -1.1668 0.2343 -3.7267  | C 0.8470 1.7018 -0.0439    | C -1.2462 -1.5554 1.8022   |
| C -4.4099 0.0696 1.9435   | H 0.0313 1.5421 0.7445     | C -2.2815 -1.1400 0.8812   |
| C -4.6445 -2.4000 0.0072  | H 0.4274 2.3535 -0.8263    | H -3.0291 0.9283 0.4513    |
| C -1.2486 2.9609 -2.4035  | H 0.7240 -0.6495 -2.8914   | Si -3.0048 -2.0499 -0.6219 |
| C -1.4747 3.9881 -1.5115  | C 1.1225 -0.8108 -1.8888   | C -1.7621 -1.2974 -1.8517  |
| C -2.2137 3.7766 -0.3052  | C 1.9477 0.1936 -1.3341    | C -0.4672 -1.8324 -2.1490  |

|                           |                            |                          |
|---------------------------|----------------------------|--------------------------|
| C 0.3912 -0.8148 -2.6452  | H 1.5719 -1.8830 4.4881    | <b>21si-HX-TS(-)iBu</b>  |
| C -0.3730 0.3890 -2.7461  | H 0.5134 -3.9143 3.5240    | C 0.8160 0.7491 1.9264   |
| C -1.6971 0.1039 -2.2304  | H -1.2678 -3.7407 1.8058   | C 1.3238 -0.5781 1.9277  |
| H -0.1679 -2.8631 -1.9643 | Zr -0.2346 -0.2603 -0.2037 | C 0.1837 -1.4491 1.9696  |
| H 1.4230 -0.9411 -2.9628  | C 1.2994 1.4575 -0.1836    | C -1.0140 -0.6282 1.9953 |
| C -4.7790 -1.5308 -0.9603 | H 0.1922 1.7677 -0.2651    | C -0.6219 0.7629 1.9298  |
| C -2.7463 -3.9079 -0.5249 | H 1.7059 1.6264 -1.1895    | H 1.4435 1.6360 1.9040   |
| C -0.0482 1.7012 -3.1986  | H 1.7179 -2.3618 -0.5286   | Si -1.6095 2.2869 1.3673 |
| C -1.0111 2.6839 -3.1265  | C 1.5918 -1.6416 0.2850    | C -0.9970 2.1863 -0.4314 |
| C -2.3165 2.4118 -2.6112  | C 2.3983 -0.4817 0.2436    | C -1.5948 1.4118 -1.4782 |
| C -2.6639 1.1535 -2.1700  | H 1.3640 -2.0577 1.2666    | C -0.6419 1.1236 -2.4917 |
| C 0.3867 -0.4985 3.3615   | C 1.9226 2.4195 0.8291     | C 0.5720 1.7960 -2.1503  |
| C 0.7905 -1.7632 3.7351   | C 1.3450 3.8293 0.6101     | C 0.3704 2.4246 -0.8618  |
| C 0.1836 -2.9333 3.1766   | H 1.6325 4.2004 -0.3886    | H -2.6214 1.0559 -1.4796 |
| C -0.8055 -2.8445 2.2200  | H 0.2482 3.8370 0.6737     | H -0.8247 0.5673 -3.4087 |
| C -1.2644 2.1864 2.4241   | H 1.7434 4.5293 1.3630     | C -1.0514 3.8401 2.2645  |
| C -2.0962 3.2033 1.6352   | C 3.4538 2.5085 0.7405     | C -3.4687 2.0247 1.4462  |
| C -1.9666 4.6135 2.2124   | H 3.8126 3.2770 1.4437     | C 1.8276 1.9053 -2.8137  |
| H -1.6198 2.1761 3.4720   | H 3.9646 1.5672 0.9870     | C 2.8442 2.6035 -2.1988  |
| H -0.2165 2.5192 2.4758   | H 3.7621 2.8137 -0.2744    | C 2.6578 3.2142 -0.9207  |
| H -3.1549 2.8925 1.6513   | H 1.6563 2.0784 1.8456     | C 1.4518 3.1345 -0.2579  |
| H -1.7885 3.1904 0.5724   | C 3.4600 -0.3450 -0.8185   | C 0.0819 -2.8661 2.0545  |
| H -0.9193 4.9583 2.1819   | H 3.6540 0.6997 -1.0927    | C -1.1694 -3.4318 2.1857 |
| H -2.2941 4.6326 3.2657   | H 3.1433 -0.8796 -1.7273   | C -2.3502 -2.6240 2.2323 |
| H -2.5811 5.3353 1.6515   | H 2.6217 -0.0244 1.2101    | C -2.2879 -1.2507 2.1290 |
| H -5.0254 -1.6453 -2.0301 | C 4.7708 -0.9626 -0.2989   | C 2.7628 -0.9785 2.0991  |
| H -4.9532 -0.4795 -0.6757 | C 5.8824 -0.9106 -1.3502   | C 3.7487 0.1919 2.0236   |
| H -5.4782 -2.1546 -0.3768 | H 4.5908 -2.0083 0.0077    | C 5.1918 -0.2643 2.2422  |
| H -3.0892 -4.3915 -1.4560 | H 5.0952 -0.4192 0.6080    | H 2.8631 -1.4651 3.0876  |
| H -3.3176 -4.3411 0.3143  | C 7.1969 -1.4947 -0.8291   | H 3.0440 -1.7502 1.3643  |
| H -1.6819 -4.1586 -0.3816 | H 5.5536 -1.4629 -2.2497   | H 3.4766 0.9413 2.7864   |
| H 0.9396 1.9100 -3.6141   | H 6.0330 0.1387 -1.6645    | H 3.6482 0.6988 1.0452   |
| H -0.7838 3.6912 -3.4815  | H 7.5518 -0.9354 0.0541    | H 5.4932 -1.0038 1.4810  |
| H -3.0537 3.2166 -2.5859  | H 7.0667 -2.5492 -0.5295   | H 5.3023 -0.7394 3.2316  |
| H -3.6717 0.9453 -1.8093  | H 7.9855 -1.4539 -1.5975   | H 5.8930 0.5837 2.1913   |
| H 0.8214 0.3913 3.8222    |                            | H -1.3383 4.7444 1.7001  |

|    |         |         |         |                         |         |         |         |    |         |         |         |
|----|---------|---------|---------|-------------------------|---------|---------|---------|----|---------|---------|---------|
| H  | 0.0397  | 3.8606  | 2.4206  | H                       | -4.0023 | -2.1288 | -0.4787 | C  | 3.0329  | -1.3758 | 2.5162  |
| H  | -1.5296 | 3.8885  | 3.2586  | H                       | -3.3869 | -0.4951 | -0.3267 | C  | 3.8495  | -2.5276 | 3.1031  |
| H  | -3.9913 | 2.9193  | 1.0650  | C                       | -6.0421 | -0.3663 | -1.0902 | H  | 1.2343  | -1.8244 | 3.6243  |
| H  | -3.7928 | 1.8618  | 2.4888  | H                       | -4.4720 | 0.1442  | -2.5017 | H  | 1.3048  | -2.5998 | 2.0524  |
| H  | -3.7954 | 1.1605  | 0.8459  | H                       | -5.0900 | -1.5017 | -2.6812 | H  | 3.2465  | -0.4471 | 3.0726  |
| H  | 1.9674  | 1.4614  | -3.8015 | H                       | -6.8630 | 0.0172  | -1.7168 | H  | 3.3359  | -1.1824 | 1.4699  |
| H  | 3.8087  | 2.7099  | -2.6995 | H                       | -6.4178 | -1.2438 | -0.5359 | H  | 3.6694  | -3.4647 | 2.5495  |
| H  | 3.4837  | 3.7718  | -0.4750 | H                       | -5.7874 | 0.4138  | -0.3503 | H  | 3.5709  | -2.7031 | 4.1560  |
| H  | 1.3093  | 3.6361  | 0.6992  | H                       | 0.1577  | -2.4145 | -2.5774 | H  | 4.9292  | -2.3124 | 3.0681  |
| H  | 0.9833  | -3.4825 | 2.0566  |                         |         |         |         | H  | 1.8715  | 5.1852  | 0.5378  |
| H  | -1.2685 | -4.5155 | 2.2752  | <b>21re-HX-TS(-)iBu</b> |         |         |         | H  | 2.4486  | 3.8367  | 1.5609  |
| H  | -3.3181 | -3.1131 | 2.3574  | C                       | 1.1386  | 0.7625  | 1.6906  | H  | 1.1477  | 4.9005  | 2.1495  |
| H  | -3.1913 | -0.6429 | 2.1721  | C                       | 0.6796  | -0.5323 | 2.0390  | H  | -1.2741 | 4.9909  | -0.4929 |
| Zr | 0.0739  | -0.0501 | -0.2948 | C                       | -0.7571 | -0.4563 | 2.0898  | H  | -1.8317 | 4.4981  | 1.1292  |
| C  | 1.8391  | -1.0454 | -1.4275 | C                       | -1.1511 | 0.8958  | 1.7561  | H  | -2.1220 | 3.4326  | -0.2746 |
| H  | 2.1160  | -0.2001 | -0.7011 | C                       | 0.0407  | 1.6588  | 1.4372  | H  | 2.8618  | -0.7317 | -3.6675 |
| H  | 1.8259  | -0.6086 | -2.4340 | H                       | 2.1892  | 1.0275  | 1.6135  | H  | 4.9867  | -0.6557 | -2.3878 |
| C  | -1.2172 | -1.8774 | -0.9852 | Si                      | 0.2548  | 3.2865  | 0.4879  | H  | 5.2690  | 0.8908  | -0.4612 |
| C  | -0.0001 | -2.3733 | -1.4971 | C                       | 0.8241  | 2.4392  | -1.1191 | H  | 3.4403  | 2.4030  | 0.2418  |
| H  | -1.4861 | -2.3197 | -0.0225 | C                       | -0.0552 | 1.9722  | -2.1476 | H  | -1.4174 | -2.4009 | 2.8389  |
| C  | 2.9280  | -2.1062 | -1.3267 | C                       | 0.5645  | 0.9366  | -2.9021 | H  | -3.7574 | -1.6324 | 3.1919  |
| C  | 4.3029  | -1.4228 | -1.2304 | C                       | 1.8941  | 0.7762  | -2.4098 | H  | -4.4280 | 0.7004  | 2.6662  |
| H  | 4.5041  | -0.8470 | -2.1499 | C                       | 2.0505  | 1.6791  | -1.2864 | H  | -2.8062 | 2.3205  | 1.7229  |
| H  | 4.3544  | -0.7331 | -0.3762 | H                       | -1.0795 | 2.3169  | -2.2884 | Zr | 0.1923  | 0.1217  | -0.4887 |
| H  | 5.0976  | -2.1785 | -1.1180 | H                       | 0.1271  | 0.4036  | -3.7444 | C  | 0.9706  | -1.9904 | -1.0110 |
| C  | 2.9174  | -3.0476 | -2.5406 | C                       | 1.5553  | 4.4043  | 1.2514  | H  | 1.6764  | -1.3476 | -0.3724 |
| H  | 3.7757  | -3.7361 | -2.4853 | C                       | -1.3984 | 4.1281  | 0.1840  | H  | 1.3541  | -1.9362 | -2.0388 |
| H  | 2.0034  | -3.6553 | -2.6043 | C                       | 2.9698  | -0.0735 | -2.8029 | C  | -1.8141 | -0.5317 | -1.5037 |
| H  | 3.0132  | -2.4630 | -3.4727 | C                       | 4.1479  | -0.0222 | -2.0922 | C  | -1.2393 | -1.8187 | -1.4986 |
| H  | 2.7655  | -2.7067 | -0.4136 | C                       | 4.3105  | 0.8663  | -0.9831 | C  | 1.0570  | -3.4216 | -0.4922 |
| H  | 0.5712  | -3.0885 | -0.9022 | C                       | 3.2936  | 1.7036  | -0.5820 | C  | 2.5295  | -3.7677 | -0.2095 |
| C  | -2.4298 | -1.6531 | -1.8850 | C                       | -1.7195 | -1.3861 | 2.5712  | H  | 3.1119  | -3.7331 | -1.1462 |
| C  | -3.6669 | -1.2600 | -1.0720 | C                       | -3.0134 | -0.9494 | 2.7770  | H  | 2.9836  | -3.0640 | 0.5020  |
| H  | -2.6485 | -2.5938 | -2.4228 | C                       | -3.3984 | 0.3920  | 2.4753  | H  | 2.6098  | -4.7856 | 0.2066  |
| H  | -2.2306 | -0.9039 | -2.6656 | C                       | -2.5023 | 1.2970  | 1.9447  | C  | 0.4902  | -4.4375 | -1.4964 |
| C  | -4.8184 | -0.7384 | -1.9300 | C                       | 1.5273  | -1.6542 | 2.5710  | H  | 0.6990  | -5.4602 | -1.1442 |

|                                |                            |                                |
|--------------------------------|----------------------------|--------------------------------|
| H -0.5968 -4.3478 -1.6333      | C -3.7360 -3.4395 -0.3622  | H 1.5227 1.5811 0.6512         |
| H 0.9775 -4.3142 -2.4800       | C -2.1121 2.9961 -1.7833   | H 0.4491 -0.8067 -2.9363       |
| H 0.4845 -3.5013 0.4485        | C -2.6380 3.7477 -0.7576   | C 0.9513 -0.8520 -1.9675       |
| H -1.5201 -2.5142 -0.7018      | C -3.2525 3.1334 0.3790    | C 1.7897 0.2609 -1.6213        |
| H -0.8837 -2.2753 -2.4213      | C -3.3829 1.7655 0.4710    | H 1.2961 -1.8428 -1.6617       |
| C -3.0812 -0.2939 -0.7053      | C 2.0878 -2.3198 0.8747    | H 1.7523 1.1070 -2.3086        |
| C -4.3177 -0.8429 -1.4310      | C 2.1729 -3.4626 0.1057    | C 1.0644 3.0894 -0.8474        |
| H -3.2261 0.7813 -0.5182       | C 1.0078 -4.0942 -0.4224   | C 2.5024 3.4291 -1.2704        |
| H -2.9985 -0.7832 0.2730       | C -0.2550 -3.5946 -0.1751  | C 0.6058 4.1496 0.1722         |
| C -5.6016 -0.6061 -0.6332      | C 1.3030 0.2173 2.7535     | H 0.4151 3.1499 -1.7363        |
| H -4.4057 -0.3747 -2.4291      | C 0.6592 1.5115 3.2641     | H 2.9639 2.6859 -1.9360        |
| H -4.1807 -1.9267 -1.6054      | C 1.6889 2.4431 3.9043     | H 2.4958 4.3980 -1.7948        |
| C -6.8384 -1.1699 -1.3357      | H 1.6725 -0.3656 3.6180    | H 3.1534 3.5412 -0.3881        |
| H -5.4925 -1.0653 0.3669       | H 2.2075 0.4447 2.1612     | H -0.4294 3.9777 0.5017        |
| H -5.7266 0.4797 -0.4637       | H -0.1303 1.2601 3.9931    | H 1.2614 4.1222 1.0604         |
| H -7.7532 -0.9889 -0.7484      | H 0.1579 2.0334 2.4303     | H 0.6701 5.1583 -0.2683        |
| H -6.9725 -0.7040 -2.3275      | H 2.4557 2.7408 3.1666     | C 3.1418 -0.0384 -1.0254       |
| H -6.7411 -2.2591 -1.4876      | H 2.2077 1.9440 4.7403     | C 3.8086 0.7104 -0.0402        |
| H -1.8081 -0.0343 -2.4782      | H 1.2172 3.3592 4.2936     | C 3.8222 -1.1511 -1.5637       |
|                                | H -5.4963 -0.9299 1.3150   | C 5.0700 0.3317 0.4281         |
| <b>12si-ST-TS(+)<i>i</i>Bu</b> | H -4.1639 -0.5031 2.4314   | H 3.3607 1.5994 0.3877         |
| C -1.0300 -0.6613 1.9508       | H -4.8066 -2.1622 2.4110   | C 5.0922 -1.5176 -1.1153       |
| C 0.3912 -0.6589 1.9475        | H -4.7998 -3.4439 -0.6568  | H 3.3500 -1.7371 -2.3514       |
| C 0.8032 -1.7854 1.1558        | H -3.5674 -4.2873 0.3239   | C 5.7180 -0.7878 -0.1012       |
| C -0.3860 -2.4393 0.6478       | H -3.1356 -3.6044 -1.2721  | H 5.5501 0.9261 1.2082         |
| C -1.5482 -1.7364 1.1473       | H -1.6602 3.4720 -2.6553   | H 5.5900 -2.3818 -1.5602       |
| H -1.6416 0.0733 2.4741        | H -2.5904 4.8372 -0.8065   | H 6.7056 -1.0783 0.2626        |
| Si -3.3149 -1.8054 0.4639      | H -3.6493 3.7689 1.1731    |                                |
| C -2.9951 -0.4722 -0.8471      | H -3.8966 1.3094 1.3169    | <b>12re-ST-TS(+)<i>i</i>Bu</b> |
| C -2.3279 -0.6890 -2.0995      | H 2.9855 -1.8376 1.2631    | C 2.3041 -0.1324 1.3935        |
| C -1.8195 0.5350 -2.6104       | H 3.1529 -3.8906 -0.1111   | C 1.4182 0.6761 2.1514         |
| C -2.2137 1.5757 -1.7153       | H 1.1222 -4.9979 -1.0244   | C 1.3501 1.9448 1.4910         |
| C -2.8983 0.9501 -0.5988       | H -1.1410 -4.0981 -0.5605  | C 2.2085 1.8930 0.3202         |
| H -2.1918 -1.6619 -2.5725      | Zr -0.5725 -0.1099 -0.4202 | C 2.8205 0.5856 0.2593         |
| H -1.2938 0.6694 -3.5538       | C 0.8702 1.7086 -0.2144    | H 2.5598 -1.1611 1.6438        |
| C -4.5612 -1.2942 1.7744       | H -0.1784 1.7771 0.2550    | Si 3.6487 -0.2813 -1.2031      |

|   |         |         |         |    |         |         |         |                                |         |         |         |
|---|---------|---------|---------|----|---------|---------|---------|--------------------------------|---------|---------|---------|
| C | 2.0086  | -0.9364 | -1.8962 | H  | 2.5424  | -3.2418 | -0.1489 | <b>21si-ST-TS(+)<i>i</i>Bu</b> |         |         |         |
| C | 1.1156  | -0.1359 | -2.6792 | H  | 0.0495  | 3.1966  | 2.7259  | C                              | -1.1658 | -2.1094 | 0.5420  |
| C | -0.1949 | -0.6768 | -2.6536 | H  | 0.3510  | 5.1952  | 1.2794  | C                              | -1.5212 | -1.3589 | 1.6941  |
| C | -0.1583 | -1.8707 | -1.8673 | H  | 1.8024  | 5.1118  | -0.7358 | C                              | -0.3050 | -1.1102 | 2.4110  |
| C | 1.2014  | -2.0162 | -1.3702 | H  | 2.9971  | 3.0344  | -1.3714 | C                              | 0.7871  | -1.7299 | 1.6809  |
| H | 1.3940  | 0.7833  | -3.1942 | Zr | 0.4455  | 0.1148  | -0.2675 | C                              | 0.2564  | -2.3323 | 0.4765  |
| H | -1.0500 | -0.2783 | -3.1912 | C  | -1.3738 | -0.4145 | 0.9901  | H                              | -1.8830 | -2.4496 | -0.2009 |
| C | 4.8059  | -1.6367 | -0.6100 | H  | -0.6245 | -1.2707 | 0.7963  | Si                             | 1.1552  | -2.7569 | -1.1477 |
| C | 4.4415  | 0.9063  | -2.4233 | H  | -1.0531 | 0.0703  | 1.9205  | C                              | 0.6916  | -1.1196 | -2.0033 |
| C | -1.1402 | -2.8582 | -1.5465 | C  | -0.9349 | 2.0063  | -0.9674 | C                              | 1.4459  | 0.0954  | -1.9296 |
| C | -0.7762 | -3.9225 | -0.7546 | C  | -1.9317 | 1.4471  | -0.1543 | C                              | 0.6026  | 1.2198  | -2.1448 |
| C | 0.5499  | -4.0486 | -0.2314 | H  | -0.3497 | 2.8360  | -0.5705 | C                              | -0.7000 | 0.7267  | -2.4786 |
| C | 1.5248  | -3.1212 | -0.5206 | C  | -2.6912 | -1.1245 | 1.3042  | C                              | -0.6594 | -0.7163 | -2.3600 |
| C | 0.6682  | 3.1475  | 1.8274  | C  | -3.5936 | -0.2480 | 2.1838  | H                              | 2.5008  | 0.1590  | -1.6716 |
| C | 0.8469  | 4.2563  | 1.0253  | C  | -2.4013 | -2.4340 | 2.0646  | H                              | 0.9196  | 2.2583  | -2.1649 |
| C | 1.6830  | 4.2086  | -0.1345 | H  | -3.2139 | -1.3756 | 0.3695  | C                              | 0.4305  | -4.2774 | -1.9774 |
| C | 2.3443  | 3.0539  | -0.4982 | H  | -3.8536 | 0.7086  | 1.7139  | C                              | 3.0193  | -2.8177 | -0.9196 |
| C | 0.7885  | 0.3317  | 3.4682  | H  | -4.5333 | -0.7793 | 2.4045  | C                              | -1.9031 | 1.3763  | -2.8755 |
| C | 0.7170  | -1.1714 | 3.7597  | H  | -3.0873 | -0.0435 | 3.1446  | C                              | -3.0167 | 0.6074  | -3.1356 |
| C | -0.0770 | -1.4701 | 5.0311  | H  | -1.7480 | -3.1021 | 1.4833  | C                              | -2.9881 | -0.8146 | -3.0039 |
| H | 1.3610  | 0.8323  | 4.2712  | H  | -1.9124 | -2.2197 | 3.0295  | C                              | -1.8397 | -1.4739 | -2.6231 |
| H | -0.2239 | 0.7745  | 3.5297  | H  | -3.3475 | -2.9601 | 2.2725  | C                              | -0.0597 | -0.4561 | 3.6513  |
| H | 1.7418  | -1.5707 | 3.8512  | H  | -2.0108 | 1.8690  | 0.8522  | C                              | 1.2225  | -0.4616 | 4.1604  |
| H | 0.2541  | -1.6886 | 2.9016  | C  | -3.2393 | 1.0689  | -0.7641 | C                              | 2.2932  | -1.1069 | 3.4647  |
| H | -1.1152 | -1.1054 | 4.9369  | C  | -3.4118 | 0.0186  | -1.6726 | C                              | 2.0954  | -1.7191 | 2.2449  |
| H | 0.3738  | -0.9717 | 5.9058  | C  | -4.3360 | 1.8974  | -0.4703 | C                              | -2.9071 | -1.0200 | 2.1568  |
| H | -0.1146 | -2.5518 | 5.2358  | C  | -4.6484 | -0.1989 | -2.2865 | C                              | -3.9764 | -1.0673 | 1.0594  |
| H | 5.0014  | -2.3689 | -1.4125 | H  | -2.5839 | -0.6554 | -1.8638 | C                              | -5.3342 | -0.5836 | 1.5687  |
| H | 4.3926  | -2.1764 | 0.2581  | C  | -5.5704 | 1.6888  | -1.0905 | H                              | -3.1867 | -1.7246 | 2.9626  |
| H | 5.7712  | -1.1990 | -0.3012 | H  | -4.2169 | 2.7194  | 0.2402  | H                              | -2.9098 | -0.0255 | 2.6388  |
| H | 4.9426  | 0.3420  | -3.2289 | C  | -5.7308 | 0.6398  | -2.0022 | H                              | -4.0612 | -2.1012 | 0.6819  |
| H | 5.1998  | 1.5326  | -1.9221 | H  | -4.7677 | -1.0303 | -2.9848 | H                              | -3.6585 | -0.4503 | 0.2005  |
| H | 3.6990  | 1.5735  | -2.8919 | H  | -6.4099 | 2.3471  | -0.8576 | H                              | -5.2714 | 0.4648  | 1.9098  |
| H | -2.1511 | -2.7834 | -1.9500 | H  | -6.6969 | 0.4725  | -2.4826 | H                              | -5.6749 | -1.1934 | 2.4225  |
| H | -1.5108 | -4.6951 | -0.5198 | H  | -1.0718 | 1.9652  | -2.0495 | H                              | -6.1022 | -0.6398 | 0.7811  |
| H | 0.7912  | -4.9101 | 0.3942  |    |         |         |         | H                              | 0.7263  | -4.3237 | -3.0400 |

|                           |                                |                           |
|---------------------------|--------------------------------|---------------------------|
| H -0.6708 -4.2870 -1.9237 | H 3.7288 -0.0254 1.1964        | H -1.7548 -1.1264 3.5591  |
| H 0.7964 -5.1908 -1.4765  | C 4.0364 2.9599 -1.2578        | H -1.1657 -2.0435 2.1883  |
| H 3.5126 -3.0018 -1.8898  | H 2.0718 3.5282 -0.5969        | H 0.5716 -0.8909 4.4456   |
| H 3.3097 -3.6300 -0.2312  | C 5.0916 2.0465 -1.1464        | H 1.2177 -1.7496 3.0431   |
| H 3.4032 -1.8642 -0.5191  | H 5.8033 0.2683 -0.1381        | H -0.1009 -3.8105 3.6618  |
| H -1.9287 2.4605 -2.9945  | H 4.1234 3.8149 -1.9318        | H -0.7772 -2.9562 5.0714  |
| H -3.9410 1.0886 -3.4617  | H 5.9993 2.1795 -1.7379        | H 0.9687 -3.3150 5.0024   |
| H -3.8901 -1.3856 -3.2321 |                                | H 4.1037 3.1662 0.7371    |
| H -1.8153 -2.5622 -2.5613 | <b>21re-ST-TS(+)<i>i</i>Bu</b> | H 3.4381 1.7011 1.5156    |
| H -0.8839 -0.0017 4.2052  | C 0.4908 0.8299 2.0731         | H 3.3221 3.2805 2.3372    |
| H 1.4279 0.0128 5.1219    | C -0.6975 0.0576 2.1409        | H 2.0372 5.4857 -0.0508   |
| H 3.2868 -1.1131 3.9173   | C -1.7421 0.8646 1.5596        | H 0.9833 5.3706 1.3909    |
| H 2.9158 -2.2174 1.7286   | C -1.1419 2.0875 1.0710        | H 0.3085 5.1027 -0.2429   |
| Zr -0.1111 0.0616 0.0173  | C 0.2734 2.0698 1.3838         | H 1.4122 -1.0328 -4.2995  |
| C -1.6374 1.6550 0.5880   | H 1.4570 0.4993 2.4519         | H 3.7414 -1.7614 -3.8312  |
| H -2.0256 0.8311 -0.1172  | Si 1.6123 3.1129 0.5405        | H 5.0622 -0.7222 -2.0018  |
| H -2.0364 1.4076 1.5814   | C 1.4463 2.2150 -1.1258        | H 4.1203 1.0988 -0.6118   |
| C 1.5135 1.4535 1.1817    | C 0.2269 2.2502 -1.8911        | H -3.6094 -0.2178 1.8940  |
| C 0.4116 2.3216 1.2463    | C 0.1830 1.1768 -2.8112        | H -5.0007 1.5628 0.8951   |
| H 1.6804 0.8378 2.0669    | C 1.4258 0.4710 -2.7116        | H -3.9751 3.6269 -0.0426  |
| H 0.3573 3.1761 0.5720    | C 2.2041 1.1057 -1.6667        | H -1.5297 4.0033 0.0879   |
| C -2.2686 2.9553 0.1009   | H -0.5741 2.9730 -1.7511       | Zr 0.0755 0.3168 -0.3491  |
| C -2.1846 4.0782 1.1471   | H -0.6042 0.9845 -3.5377       | C 1.1115 -1.6697 0.0661   |
| C -3.7535 2.6894 -0.2151  | C 3.2744 2.7800 1.3545         | H 1.7315 -0.7325 0.3221   |
| H -1.7605 3.2781 -0.8247  | C 1.1907 4.9365 0.3973         | H 0.6596 -2.0127 1.0082   |
| H -1.1592 4.4239 1.3394   | C 1.9854 -0.5842 -3.4851       | C -1.6433 -1.1214 -1.4548 |
| H -2.7700 4.9460 0.8036   | C 3.2807 -0.9781 -3.2259       | C -0.5442 -1.9911 -1.4174 |
| H -2.6197 3.7382 2.1038   | C 4.0411 -0.3775 -2.1761       | H 0.1810 -1.9987 -2.2314  |
| H -3.8691 1.9024 -0.9750  | C 3.5210 0.6303 -1.3929        | C 2.1214 -2.7035 -0.4218  |
| H -4.2819 2.3675 0.6992   | C -3.1490 0.6893 1.5037        | C 1.5862 -4.1402 -0.3222  |
| H -4.2363 3.6102 -0.5823  | C -3.9176 1.6834 0.9378        | C 3.3956 -2.5844 0.4358   |
| H -0.1138 2.4306 2.1945   | C -3.3291 2.8648 0.3985        | H 2.3857 -2.4876 -1.4674  |
| C 2.7329 1.7021 0.3723    | C -1.9669 3.0737 0.4537        | H 0.7862 -4.3548 -1.0463  |
| C 3.8137 0.8082 0.4989    | C -0.8853 -1.2357 2.8861       | H 2.4027 -4.8534 -0.5187  |
| C 2.8737 2.7939 -0.5023   | C 0.3347 -1.6734 3.7039        | H 1.2030 -4.3394 0.6949   |
| C 4.9788 0.9754 -0.2531   | C 0.0970 -3.0135 4.4005        | H 3.8171 -1.5678 0.3893   |





|   |         |         |         |    |         |         |         |    |         |         |         |
|---|---------|---------|---------|----|---------|---------|---------|----|---------|---------|---------|
| C | 0.1229  | -1.9633 | -1.6707 | H  | -2.9420 | -2.1558 | 2.2862  | C  | -0.4426 | 0.9419  | 2.2327  |
| H | -0.9747 | -3.2191 | 1.2321  | Zr | -0.3415 | -0.3259 | 0.2261  | C  | 0.0414  | 1.9548  | 1.3209  |
| H | 1.6638  | -2.7658 | 1.2186  | C  | 1.2981  | 1.1704  | -0.5935 | H  | 2.1029  | 2.2049  | 0.4736  |
| C | -3.3617 | -1.7994 | -2.8377 | H  | 0.5711  | 0.7008  | -1.3480 | Si | -0.9360 | 3.0894  | 0.1483  |
| C | -3.8504 | -3.4105 | -0.1740 | H  | 2.2489  | 0.7466  | -0.9226 | C  | -0.7788 | 1.9165  | -1.3399 |
| C | 2.5929  | -1.6720 | -1.4473 | H  | 0.9843  | -0.9384 | 2.6587  | C  | -1.6830 | 0.8456  | -1.6360 |
| C | 2.6115  | -1.1898 | -2.7386 | C  | 0.7477  | 0.0260  | 2.2007  | C  | -1.0390 | -0.1443 | -2.4261 |
| C | 1.4134  | -1.0624 | -3.5096 | C  | 1.7999  | 0.6984  | 1.4727  | C  | 0.2758  | 0.3270  | -2.7286 |
| C | 0.1888  | -1.4355 | -2.9984 | H  | 0.1118  | 0.6696  | 2.8175  | C  | 0.4562  | 1.5839  | -2.0311 |
| C | -2.1039 | 1.6658  | 2.8318  | C  | 1.2303  | 2.6782  | -0.8934 | H  | -2.6979 | 0.7601  | -1.2533 |
| C | -2.2453 | 0.8006  | 3.9007  | C  | 2.0358  | 2.9422  | -2.1825 | H  | -1.4975 | -1.0555 | -2.7986 |
| C | -2.5115 | -0.5872 | 3.6949  | H  | 3.1098  | 2.7508  | -2.0104 | C  | -0.0816 | 4.7432  | -0.0945 |
| C | -2.6859 | -1.1072 | 2.4274  | H  | 1.7013  | 2.2819  | -3.0019 | C  | -2.7445 | 3.2168  | 0.6426  |
| C | -1.9882 | 3.2721  | 0.0275  | H  | 1.9203  | 3.9890  | -2.5071 | C  | 1.3370  | -0.2196 | -3.5063 |
| C | -2.2007 | 3.7317  | -1.4225 | C  | 1.6808  | 3.6377  | 0.2139  | C  | 2.5330  | 0.4618  | -3.5689 |
| C | -1.9005 | 5.2234  | -1.5885 | H  | 1.6167  | 4.6726  | -0.1592 | C  | 2.7216  | 1.6968  | -2.8751 |
| H | -2.7467 | 3.7619  | 0.6681  | H  | 1.0400  | 3.5758  | 1.1084  | C  | 1.7127  | 2.2559  | -2.1207 |
| H | -1.0159 | 3.6404  | 0.4043  | H  | 2.7251  | 3.4672  | 0.5222  | C  | 0.4246  | -1.0943 | 3.3807  |
| H | -3.2395 | 3.5127  | -1.7136 | H  | 0.1841  | 2.9187  | -1.1119 | C  | -0.7923 | -1.2062 | 4.0198  |
| H | -1.5606 | 3.1440  | -2.1006 | C  | 3.1586  | 0.1031  | 1.2968  | C  | -1.8387 | -0.2541 | 3.7988  |
| H | -0.8439 | 5.4360  | -1.3503 | C  | 3.5304  | -1.1042 | 1.9179  | C  | -1.6847 | 0.7938  | 2.9160  |
| H | -2.5255 | 5.8256  | -0.9110 | C  | 4.1381  | 0.7885  | 0.5526  | C  | 3.1904  | -0.1045 | 1.9204  |
| H | -2.0951 | 5.5587  | -2.6209 | C  | 4.8098  | -1.6384 | 1.7429  | C  | 4.2201  | 0.5765  | 1.0130  |
| H | -3.1255 | -2.6776 | -3.4685 | H  | 2.8315  | -1.6267 | 2.5632  | C  | 5.6241  | 0.0065  | 1.2185  |
| H | -2.8607 | -0.9207 | -3.2678 | C  | 5.4167  | 0.2595  | 0.3742  | H  | 3.4999  | 0.0296  | 2.9741  |
| H | -4.4548 | -1.6295 | -2.8854 | H  | 3.8872  | 1.7414  | 0.0858  | H  | 3.2041  | -1.1922 | 1.7484  |
| H | -3.9002 | -4.3275 | -0.7927 | C  | 5.7536  | -0.9655 | 0.9592  | H  | 4.2251  | 1.6597  | 1.2231  |
| H | -4.8789 | -3.0583 | 0.0005  | H  | 5.0749  | -2.5757 | 2.2360  | H  | 3.9096  | 0.4699  | -0.0436 |
| H | -3.4103 | -3.6839 | 0.7972  | H  | 6.1538  | 0.8114  | -0.2112 | H  | 5.6499  | -1.0735 | 0.9953  |
| H | 3.5089  | -1.7589 | -0.8640 | H  | 6.7558  | -1.3824 | 0.8233  | H  | 5.9464  | 0.1387  | 2.2652  |
| H | 3.5611  | -0.9015 | -3.1938 | H  | 1.8180  | 1.7810  | 1.5789  | H  | 6.3599  | 0.5072  | 0.5695  |
| H | 1.4812  | -0.6849 | -4.5301 |    |         |         |         | H  | -0.4616 | 5.2541  | -0.9963 |
| H | -0.7178 | -1.3717 | -3.6041 |    |         |         |         | H  | 1.0099  | 4.6256  | -0.1974 |
| H | -1.8990 | 2.7261  | 2.9855  |    |         |         |         | H  | -0.2661 | 5.3961  | 0.7765  |
| H | -2.1542 | 1.1774  | 4.9189  |    |         |         |         | H  | -3.2949 | 3.8382  | -0.0849 |
| H | -2.6055 | -1.2406 | 4.5641  |    |         |         |         | H  | -2.8526 | 3.6822  | 1.6375  |

**21si-ST-TS(-)iBu**

|                           |                           |                           |
|---------------------------|---------------------------|---------------------------|
| H -3.2214 2.2223 0.6688   | H -5.9183 -0.0340 0.2574  | H 4.4065 -2.9655 2.1889   |
| H 1.1901 -1.1500 -4.0587  | H -4.6045 -2.7501 -2.8281 | H 4.2044 -2.3608 3.8512   |
| H 3.3523 0.0645 -4.1716   | H -6.3700 -1.2726 -1.8657 | H 5.4203 -1.6201 2.7768   |
| H 3.6793 2.2132 -2.9649   |                           | H 0.8479 5.2512 1.2195    |
| H 1.8562 3.2165 -1.6247   | <b>21re-ST-TS(-)iBu</b>   | H 1.6313 3.9222 2.1244    |
| H 1.2345 -1.7983 3.5831   | C 1.0093 0.7153 1.8094    | H 0.1176 4.6357 2.7329    |
| H -0.9623 -2.0214 4.7257  | C 0.8657 -0.6870 1.9514   | H -2.1647 4.5755 -0.0343  |
| H -2.7760 -0.3662 4.3471  | C -0.5417 -0.9640 1.8631  | H -2.6477 3.8074 1.5027   |
| H -2.4834 1.5190 2.7599   | C -1.2409 0.2928 1.6765   | H -2.6967 2.8668 -0.0117  |
| Zr 0.0858 -0.0547 -0.1174 | C -0.2600 1.3565 1.5853   | H 3.2296 0.1499 -3.4714   |
| C 1.3522 -1.8808 -0.6873  | H 1.9651 1.2279 1.8533    | H 5.2254 0.5151 -2.0416   |
| H 1.9166 -0.8751 -0.6943  | Si -0.3562 3.1003 0.8408  | H 5.0893 1.9002 0.0191    |
| H 1.1286 -2.1071 -1.7389  | C 0.4583 2.5907 -0.8080   | H 2.9571 2.9400 0.7214    |
| C -1.5975 -1.6754 0.6157  | C -0.2429 2.0847 -1.9476  | H -0.7410 -3.1089 2.2434  |
| C -0.5587 -2.5683 0.3203  | C 0.6138 1.2731 -2.7460   | H -3.2208 -2.9888 2.4127  |
| H -1.6501 -1.3628 1.6579  | C 1.9149 1.3146 -2.1649   | H -4.4131 -0.8285 2.1640  |
| C 2.3112 -2.9259 -0.1252  | C 1.8222 2.1049 -0.9527   | H -3.1992 1.2623 1.6531   |
| C 3.7304 -2.6584 -0.6553  | H -1.2999 2.2506 -2.1462  | Zr 0.2705 0.1370 -0.4705  |
| H 3.7499 -2.7658 -1.7533  | H 0.3445 0.7697 -3.6728   | C 1.3603 -1.7362 -1.1885  |
| H 4.0730 -1.6446 -0.4047  | C 0.6593 4.3420 1.8167    | H 1.9748 -1.0558 -0.4870  |
| H 4.4417 -3.3838 -0.2271  | C -2.1322 3.6347 0.5419   | H 1.7469 -1.5356 -2.1985  |
| C 1.8957 -4.3545 -0.5109  | C 3.1573 0.7285 -2.5483   | C -1.6450 -0.7517 -1.8027 |
| H 2.6760 -5.0660 -0.1966  | C 4.2619 0.9411 -1.7543   | C -0.8178 -1.8853 -1.7754 |
| H 0.9510 -4.6702 -0.0456  | C 4.1833 1.7347 -0.5671   | C 1.6655 -3.1763 -0.7865  |
| H 1.7888 -4.4346 -1.6074  | C 2.9982 2.3097 -0.1673   | C 3.1774 -3.3154 -0.5310  |
| H 2.3243 -2.8508 0.9774   | C -1.2706 -2.1663 2.0888  | H 3.7327 -3.1436 -1.4691  |
| H 0.0739 -2.9022 1.1432   | C -2.6414 -2.0889 2.1968  | H 3.5361 -2.5922 0.2143   |
| H -0.6400 -3.2450 -0.5302 | C -3.3296 -0.8454 2.0529  | H 3.4134 -4.3317 -0.1745  |
| C -2.8894 -1.5958 -0.1030 | C -2.6610 0.3217 1.7620   | C 1.2573 -4.1942 -1.8642  |
| C -3.9031 -0.7847 0.4432  | C 1.9413 -1.6397 2.3897   | H 1.6458 -5.1891 -1.5940  |
| C -3.1664 -2.3064 -1.2832 | C 3.3566 -1.0554 2.3285   | H 0.1691 -4.2856 -1.9870  |
| C -5.1451 -0.6666 -0.1843 | C 4.4087 -2.0547 2.8113   | H 1.6966 -3.9162 -2.8388  |
| H -3.7037 -0.2465 1.3726  | H 1.7212 -1.9332 3.4338   | H 1.1183 -3.4112 0.1432   |
| C -4.4076 -2.1878 -1.9127 | H 1.8979 -2.5748 1.8111   | H -1.0285 -2.6745 -1.0494 |
| H -2.4101 -2.9645 -1.7167 | H 3.3992 -0.1454 2.9511   | H -0.3035 -2.1971 -2.6813 |
| C -5.4006 -1.3622 -1.3718 | H 3.5785 -0.7293 1.2947   | H -1.5426 -0.1198 -2.6867 |

|                              |                           |                              |
|------------------------------|---------------------------|------------------------------|
| C -3.0114 -0.7040 -1.2264    | C -2.2318 -2.4825 -0.2110 | H -1.9573 2.8369 2.3184      |
| C -3.7151 0.5143 -1.2265     | C -1.7002 2.2465 -1.9194  | H -0.7690 1.1118 3.6682      |
| C -3.6932 -1.8646 -0.8267    | C -0.5443 3.0283 -2.5474  | H -3.0688 2.3207 3.5978      |
| C -5.0503 0.5775 -0.8273     | C -0.9647 4.4506 -2.9221  |                              |
| H -3.2119 1.4218 -1.5670     | H -2.5430 2.1953 -2.6358  | <b>Cat3-12si-BT-Reactant</b> |
| C -5.0331 -1.8058 -0.4331    | H -2.0858 2.7983 -1.0428  | C 0.1544 -1.3777 1.8240      |
| H -3.1864 -2.8300 -0.8523    | H -0.1959 2.4890 -3.4463  | C 1.5190 -1.2877 1.4508      |
| C -5.7174 -0.5865 -0.4275    | H 0.3031 3.0580 -1.8395   | C 1.6425 -1.9681 0.1844      |
| H -5.5768 1.5343 -0.8431     | H -1.2856 5.0130 -2.0282  | C 0.3146 -2.3779 -0.2292     |
| H -5.5487 -2.7234 -0.1414    | H -1.8090 4.4367 -3.6327  | C -0.6317 -2.0188 0.8069     |
| H -6.7673 -0.5454 -0.1308    | H -0.1345 5.0019 -3.3912  | H -0.2456 -0.9584 2.7459     |
|                              | H 3.4006 -2.5474 -2.5397  | Si -2.5159 -1.8794 0.6111    |
| <b>Cat3-12si-PP-Reactant</b> | H 2.4430 -1.1529 -3.1199  | C -2.4072 -0.2988 -0.4389    |
| C -0.1913 0.1140 -1.8847     | H 2.0004 -2.8022 -3.6225  | C -1.8464 -0.2915 -1.7615    |
| C -1.3471 0.8470 -1.5197     | H 1.7083 -4.7963 -0.9017  | C -1.4404 1.0182 -2.1208     |
| C -2.2195 -0.0834 -0.8561    | H 0.1192 -4.5854 -1.6892  | C -1.8175 1.9005 -1.0523     |
| C -1.5616 -1.3794 -0.8187    | H 0.3036 -4.2805 0.0634   | C -2.4032 1.0877 -0.0066     |
| C -0.2742 -1.2631 -1.4584    | H 2.9203 1.8712 3.1031    | H -1.7053 -1.1749 -2.3820    |
| H 0.6647 0.5528 -2.3959      | H 4.0876 3.1981 1.3611    | H -1.0273 1.3151 -3.0831     |
| Si 1.2438 -2.3908 -1.2974    | H 4.2366 2.3906 -0.9829   | C -3.3052 -1.5853 2.2897     |
| C 1.8871 -1.5366 0.2742      | H 3.2677 0.2078 -1.6504   | C -3.2901 -3.2936 -0.3511    |
| C 1.3774 -1.7962 1.5851      | H -4.0594 1.0208 -0.4480  | C -1.7298 3.3084 -0.8983     |
| C 1.6267 -0.6928 2.4497      | H -5.2225 -0.9688 0.4950  | C -2.2066 3.8767 0.2654      |
| C 2.3876 0.2717 1.7126       | H -4.0667 -3.1630 0.6611  | C -2.7718 3.0785 1.3043      |
| C 2.5054 -0.2250 0.3546      | H -1.7467 -3.4579 -0.1625 | C -2.8704 1.7081 1.1853      |
| H 0.8198 -2.6925 1.8610      | Zr -0.0101 0.0244 0.6041  | C 2.7658 -2.3142 -0.6210     |
| H 1.3754 -0.6354 3.5082      | C 0.1897 2.2263 0.7687    | C 2.5570 -2.9606 -1.8207     |
| C 2.3807 -2.1997 -2.7792     | H 1.0129 2.5482 0.0961    | C 1.2431 -3.2958 -2.2673     |
| C 0.7951 -4.1763 -0.9184     | H -0.7260 2.7526 0.4513   | C 0.1372 -3.0214 -1.4903     |
| C 2.9799 1.5120 2.0739       | H 0.4330 2.5513 1.7926    | C 2.6061 -0.7195 2.3199      |
| C 3.6235 2.2448 1.1015       | H -1.0565 -1.1836 2.9625  | C 3.6919 0.1095 1.6170       |
| C 3.7108 1.7792 -0.2470      | C -1.7372 -0.4108 2.5895  | C 4.6289 0.7707 2.6298       |
| C 3.1669 0.5723 -0.6279      | C -1.6361 0.8536 3.0441   | H 2.1304 -0.0947 3.0945      |
| C -3.5493 0.0583 -0.3700     | H -2.5797 -0.7160 1.9650  | H 3.0986 -1.5509 2.8588      |
| C -4.1904 -1.0502 0.1484     | C -2.5399 1.9787 2.6865   | H 3.2170 0.8842 0.9906       |
| C -3.5279 -2.3130 0.2376     | H -3.2925 1.6763 1.9431   | H 4.2807 -0.5270 0.9365      |

|                           |                              |                           |
|---------------------------|------------------------------|---------------------------|
| H 5.1140 0.0110 3.2658    | <b>Cat3-12si-HX-Reactant</b> | H 2.9022 -2.2962 2.3028   |
| H 4.0688 1.4535 3.2916    | C 2.2264 0.6052 1.3510       | H 4.5696 -2.3526 1.6688   |
| H 5.4205 1.3499 2.1279    | C 1.6540 1.8833 1.1484       | H 4.2983 -3.2986 -1.6608  |
| H -4.3417 -1.2218 2.1816  | C 1.7583 2.1612 -0.2635      | H 5.0550 -1.6851 -1.5066  |
| H -2.7391 -0.8452 2.8794  | C 2.3248 0.9908 -0.9052      | H 3.6383 -1.9192 -2.5720  |
| H -3.3322 -2.5278 2.8635  | C 2.6345 0.0042 0.1099       | H -3.3702 -2.4557 -0.2128 |
| H -4.3898 -3.1963 -0.3365 | H 2.3021 0.1284 2.3270       | H -3.3218 -3.4902 2.0486  |
| H -3.0246 -4.2666 0.0975  | Si 2.9643 -1.8457 -0.1576    | H -1.1703 -3.9760 3.1864  |
| H -2.9719 -3.3001 -1.4066 | C 1.1505 -2.2327 -0.5675     | H 0.9985 -3.4503 2.1075   |
| H -1.3153 3.9265 -1.6959  | C 0.5208 -1.7448 -1.7627     | H 1.1332 4.2390 -0.5564   |
| H -2.1637 4.9600 0.3953   | C -0.8892 -1.7574 -1.6188    | H 1.4781 4.1729 -3.0022   |
| H -3.1447 3.5709 2.2044   | C -1.1936 -2.3327 -0.3402    | H 2.2986 2.1127 -4.1302   |
| H -3.3229 1.1081 1.9745   | C 0.0639 -2.6208 0.3157      | H 2.9117 0.1042 -2.8168   |
| H 3.7776 -2.0877 -0.2868  | H 1.0494 -1.3799 -2.6412     | Zr 0.1978 -0.0339 -0.0024 |
| H 3.4127 -3.2398 -2.4388  | H -1.6100 -1.5029 -2.3925    | C -0.6609 -0.1431 2.0525  |
| H 1.1209 -3.8116 -3.2216  | C 3.5229 -2.6296 1.4546      | H 0.0527 -0.4764 2.8222   |
| H -0.8577 -3.3366 -1.8051 | C 4.0923 -2.2150 -1.6119     | H -0.9667 0.8884 2.3102   |
| Zr -0.0012 0.1339 -0.1699 | C -2.4235 -2.6468 0.2953     | H -1.5384 -0.8081 2.0808  |
| C 0.3624 1.6782 1.3982    | C -2.3884 -3.2254 1.5478     | H -0.6567 1.9582 -1.9090  |
| H 0.0918 1.3654 2.4191    | C -1.1512 -3.5062 2.2012     | C -1.2727 1.8273 -1.0118  |
| H 1.4594 1.8376 1.3886    | C 0.0589 -3.2138 1.6080      | C -2.3271 0.9704 -0.9885  |
| H -0.1473 2.6275 1.1775   | C 1.4803 3.3244 -1.0366      | H -1.1067 2.5287 -0.1890  |
| H 1.5740 -0.2690 -2.3602  | C 1.6769 3.2834 -2.4009      | C -3.2875 0.8282 0.1491   |
| C 2.0173 0.5241 -1.7391   | C 2.1551 2.1042 -3.0480      | H -3.0464 1.5668 0.9299   |
| C 1.7689 1.8361 -1.9769   | C 2.4839 0.9772 -2.3231      | H -3.1656 -0.1743 0.5978  |
| H 2.8188 0.2320 -1.0580   | C 1.2184 2.8142 2.2459       | C -4.7514 0.9703 -0.3210  |
| C 2.5008 2.9627 -1.3191   | C -0.0996 3.5774 2.0423      | H -4.8675 1.9056 -0.8976  |
| H 3.2700 3.2836 -2.0504   | C -0.4098 4.4752 3.2419      | H -5.3874 1.0721 0.5744   |
| H 3.0481 2.5897 -0.4370   | H 1.1528 2.2374 3.1835       | C -5.2445 -0.2190 -1.1513 |
| C 1.6209 4.1686 -0.9678   | H 2.0229 3.5584 2.4010       | H -5.1573 -1.1384 -0.5426 |
| H 1.0943 4.5412 -1.8628   | H -0.9263 2.8608 1.8976      | H -4.5934 -0.3641 -2.0337 |
| H 2.2426 4.9878 -0.5751   | H -0.0511 4.1899 1.1270      | C -6.6923 -0.0367 -1.6117 |
| H 1.0246 2.1119 -2.7320   | H 0.3955 5.2134 3.3957       | H -6.7912 0.8629 -2.2431  |
| H 0.8702 3.9063 -0.2084   | H -0.4963 3.8765 4.1648      | H -7.3638 0.0862 -0.7447  |
|                           | H -1.3541 5.0243 3.0993      | H -7.0416 -0.9038 -2.1946 |
|                           | H 3.4663 -3.7304 1.3973      | H -2.5343 0.3729 -1.8793  |

|                           |                           |                          |
|---------------------------|---------------------------|--------------------------|
| <b>Cat3-12si-PP-TS</b>    | H -2.5900 -1.0107 3.0547  | C 2.3702 0.5667 -0.8465  |
| C 0.2177 -0.1380 1.8876   | H -2.4493 -2.7478 3.4155  | C 1.7113 0.8533 -2.0908  |
| C 1.4791 0.4163 1.5411    | H -2.5204 -4.5275 0.5225  | C 1.2822 -0.3423 -2.7184 |
| C 2.1812 -0.5970 0.8031   | H -0.9227 -4.6698 1.3095  | C 1.7108 -1.4387 -1.9050 |
| C 1.3035 -1.7429 0.6595   | H -1.0402 -4.1838 -0.4070 | C 2.3592 -0.8782 -0.7318 |
| C 0.0612 -1.4638 1.3523   | H -2.4816 2.5772 -2.8738  | H 1.5159 1.8569 -2.4702  |
| H -0.5471 0.3946 2.4511   | H -3.3173 3.9652 -0.9907  | H 0.7640 -0.4182 -3.6725 |
| Si -1.6355 -2.2867 1.1191 | H -3.5999 3.0030 1.2831   | C 3.8206 1.3311 1.8545   |
| C -2.1208 -1.1996 -0.3649 | H -3.1186 0.6158 1.7339   | C 2.7625 3.5489 -0.1120  |
| C -1.6822 -1.4351 -1.7134 | H 4.1812 0.2031 0.4465    | C 1.5967 -2.8515 -2.0555 |
| C -1.7409 -0.2421 -2.4753 | H 4.9319 -1.8211 -0.7894  | C 2.0715 -3.6645 -1.0505 |
| C -2.2797 0.7842 -1.6363  | H 3.3978 -3.7418 -1.1457  | C 2.6724 -3.1188 0.1273  |
| C -2.4886 0.2021 -0.3220  | H 1.1020 -3.7388 -0.2137  | C 2.8202 -1.7586 0.2959  |
| H -1.3011 -2.3875 -2.0838 | Zr 0.0043 0.0360 -0.5783  | C -2.9091 1.6039 1.0206  |
| H -1.4763 -0.1364 -3.5258 | C 0.4653 2.2722 -0.9167   | C -3.1652 2.7685 0.3227  |
| C -2.7179 -2.0200 2.6300  | H -0.3586 2.1117 -0.1499  | C -2.1028 3.5814 -0.1740 |
| C -1.5121 -4.0825 0.5844  | H 1.3079 2.7124 -0.3728   | C -0.7794 3.2539 0.0484  |
| C -2.5970 2.1531 -1.8741  | H 0.0225 2.9929 -1.6125   | C -1.7602 -0.9738 2.6435 |
| C -3.0595 2.9171 -0.8257  | H 0.8681 -0.7368 -3.1323  | C -0.9130 -2.1656 3.1005 |
| C -3.2255 2.3627 0.4821   | C 1.4310 -0.2136 -2.3540  | C -1.7650 -3.2511 3.7593 |
| C -2.9510 1.0370 0.7425   | C 1.4782 1.2180 -2.4529   | H -2.2555 -0.5253 3.5253 |
| C 3.5018 -0.6357 0.2832   | H 2.3494 -0.7082 -2.0234  | H -2.5875 -1.3263 1.9998 |
| C 3.9142 -1.7646 -0.3981  | C 2.8003 1.9235 -2.2632   | H -0.1451 -1.8090 3.8089 |
| C 3.0350 -2.8704 -0.5972  | H 3.3432 1.5116 -1.3990   | H -0.3698 -2.5862 2.2356 |
| C 1.7502 -2.8709 -0.0899  | H 2.6945 3.0122 -2.1506   | H -2.5186 -3.6422 3.0533 |
| C 2.0575 1.7220 2.0019    | H 0.8188 1.6640 -3.2023   | H -2.3032 -2.8494 4.6346 |
| C 1.0338 2.6947 2.5958    | H 3.4056 1.7301 -3.1661   | H -1.1457 -4.0962 4.0990 |
| C 1.6743 4.0279 2.9834    |                           | H 4.8003 1.1526 1.3785   |
| H 2.8345 1.5100 2.7604    | <b>Cat3-12si-BT-TS</b>    | H 3.5299 0.4193 2.4020   |
| H 2.5972 2.2074 1.1679    | C 0.4168 0.3041 1.9444    | H 3.9390 2.1408 2.5954   |
| H 0.5687 2.2285 3.4819    | C -0.9892 0.1017 1.9352   | H 3.8096 3.6908 -0.4310  |
| H 0.2195 2.8639 1.8685    | C -1.5594 1.2302 1.2532   | H 2.5313 4.3106 0.6526   |
| H 2.1154 4.5232 2.1006    | C -0.4752 2.0836 0.8040   | H 2.1174 3.7316 -0.9876  |
| H 2.4821 3.8746 3.7192    | C 0.7798 1.5077 1.2445    | H 1.1485 -3.2725 -2.9579 |
| H 0.9359 4.7146 3.4264    | H 1.1292 -0.3880 2.3915   | H 2.0015 -4.7493 -1.1522 |
| H -3.7843 -2.1596 2.3815  | Si 2.5323 1.8172 0.5775   | H 3.0404 -3.8006 0.8962  |

|                           |                          |                           |
|---------------------------|--------------------------|---------------------------|
| H 3.3145 -1.3542 1.1793   | H 1.6540 1.7435 -2.6521  | Zr 0.3417 -0.0449 -0.4363 |
| H -3.7236 0.9911 1.4118   | H 0.5943 -0.4807 -3.7049 | C -0.8251 -2.0209 -0.2026 |
| H -4.1966 3.0823 0.1501   | C 4.5367 1.0563 1.2986   | H 0.2389 -2.0943 0.1936   |
| H -2.3472 4.4922 -0.7240  | C 3.3865 3.3488 -0.5231  | H -1.4779 -2.1539 0.6659  |
| H 0.0229 3.9029 -0.3036   | C 1.5037 -2.9592 -2.2007 | H -0.8986 -2.8712 -0.8888 |
| Zr 0.0070 -0.0424 -0.4811 | C 2.0704 -3.7994 -1.2681 | H -1.1919 0.7972 -2.6406  |
| C -1.0791 -2.0704 -0.4613 | C 2.8715 -3.2906 -0.1981 | C -1.5164 0.5687 -1.6217  |
| H -0.0784 -2.1251 0.0753  | C 3.1271 -1.9422 -0.0686 | C -2.0363 -0.7505 -1.3919 |
| H -1.8515 -2.2038 0.3027  | C -2.1986 1.8581 1.4137  | H -2.0265 1.3840 -1.0998  |
| H -1.0449 -2.9219 -1.1492 | C -2.4611 3.0231 0.7189  | C -3.2893 -0.9091 -0.5583 |
| H -1.1815 0.8328 -2.8664  | C -1.4218 3.7334 0.0477  | H -3.1604 -0.3744 0.3962  |
| C -1.6726 0.5193 -1.9411  | C -0.1093 3.3055 0.0950  | C -4.5086 -0.3351 -1.2958 |
| C -2.1167 -0.8396 -1.8712 | C -1.0401 -0.7832 2.9178 | H -3.4723 -1.9698 -0.3256 |
| H -2.3211 1.2666 -1.4745  | C -0.2231 -2.0168 3.3135 | H -4.6257 -0.8398 -2.2725 |
| C -3.4947 -1.1376 -1.3187 | C -1.0588 -3.0195 4.1099 | H -4.3322 0.7331 -1.5116  |
| H -3.6244 -0.5957 -0.3680 | H -1.3936 -0.2761 3.8354 | C -5.7921 -0.4936 -0.4765 |
| C -4.5596 -0.6848 -2.3300 | H -1.9606 -1.0950 2.3900 | H -5.6557 0.0019 0.5033   |
| H -3.6096 -2.2132 -1.1158 | H 0.6476 -1.6942 3.9107  | C -7.0112 0.0912 -1.1920  |
| H -4.4254 -1.1912 -3.3008 | H 0.1817 -2.4987 2.4055  | H -5.9574 -1.5654 -0.2632 |
| H -4.5007 0.4021 -2.4997  | H -1.9186 -3.3742 3.5149 | H -7.1772 -0.4128 -2.1598 |
| H -1.7950 -1.4920 -2.6877 | H -1.4565 -2.5551 5.0283 | H -6.8699 1.1674 -1.3941  |
| H -5.5659 -0.9293 -1.9542 | H -0.4616 -3.8971 4.4035 | H -7.9248 -0.0250 -0.5871 |
|                           | H 5.4184 0.7897 0.6904   | H -1.9443 -1.4483 -2.2287 |
|                           | H 4.2537 0.1789 1.9033   |                           |
|                           | H 4.8301 1.8600 1.9963   | <b>Cat3-12si-ST-TS</b>    |
|                           | H 4.3922 3.4127 -0.9735  | C 2.4308 0.3611 0.6506    |
|                           | H 3.3092 4.1285 0.2542   | C 2.4811 -0.9902 0.2086   |
|                           | H 2.6511 3.5742 -1.3132  | C 1.6000 -1.7332 1.0752   |
|                           | H 0.9015 -3.3532 -3.0223 | C 0.9900 -0.7889 2.0008   |
|                           | H 1.9190 -4.8778 -1.3466 | C 1.5209 0.5321 1.7463    |
|                           | H 3.3059 -3.9928 0.5161  | H 3.0015 1.1657 0.1867    |
|                           | H 3.7707 -1.5694 0.7283  | Si 0.8124 2.2287 2.2313   |
|                           | H -2.9944 1.3233 1.9352  | C -0.2952 2.3454 0.6961   |
|                           | H -3.4791 3.4160 0.6832  | C -1.5862 1.7252 0.5819   |
|                           | H -1.6715 4.6463 -0.4965 | C -1.9397 1.5495 -0.7776  |
|                           | H 0.6822 3.8791 -0.3880  | C -0.8849 2.0955 -1.5742  |
| <b>Cat3-12si-HX-TS</b>    |                          |                           |
| C 1.1130 0.3075 1.8961    |                          |                           |
| C -0.2926 0.2154 2.0834   |                          |                           |
| C -0.8635 1.3781 1.4623   |                          |                           |
| C 0.2080 2.1324 0.8413    |                          |                           |
| C 1.4647 1.4683 1.1236    |                          |                           |
| H 1.8268 -0.4329 2.2553   |                          |                           |
| Si 3.1213 1.6408 0.2116   |                          |                           |
| C 2.6601 0.4046 -1.1583   |                          |                           |
| C 1.8410 0.7308 -2.2937   |                          |                           |
| C 1.2496 -0.4363 -2.8371  |                          |                           |
| C 1.7250 -1.5561 -2.0838  |                          |                           |
| C 2.5751 -1.0359 -1.0268  |                          |                           |

|   |         |         |         |                        |         |         |         |   |         |         |         |
|---|---------|---------|---------|------------------------|---------|---------|---------|---|---------|---------|---------|
| C | 0.1464  | 2.5667  | -0.6663 | H                      | -0.4229 | -0.5371 | 3.6476  | H | -1.7247 | -1.6966 | -2.1273 |
| H | -2.1948 | 1.3825  | 1.4187  | Zr                     | 0.1381  | 0.0847  | -0.2241 | H | -1.5204 | 0.7081  | -3.2711 |
| H | -2.8668 | 1.1189  | -1.1434 | C                      | 0.6435  | -0.6504 | -2.3528 | C | -2.7615 | -1.6277 | 2.7122  |
| C | 2.1748  | 3.5203  | 2.2822  | H                      | 1.2710  | 0.2517  | -2.0498 | C | -2.5111 | -3.6715 | 0.3389  |
| C | -0.2384 | 2.1761  | 3.7870  | H                      | 1.3775  | -1.3850 | -2.7000 | C | -2.1995 | 2.9271  | -1.3047 |
| C | -0.7132 | 2.2250  | -2.9829 | H                      | -0.0022 | -0.3078 | -3.1688 | C | -2.4868 | 3.6208  | -0.1484 |
| C | 0.4619  | 2.7614  | -3.4610 | C                      | -1.3598 | -1.7506 | -0.3240 | C | -2.7035 | 2.9397  | 1.0882  |
| C | 1.4967  | 3.1946  | -2.5735 | C                      | -0.5730 | -2.1037 | -1.4548 | C | -2.6782 | 1.5598  | 1.1693  |
| C | 1.3552  | 3.1066  | -1.2050 | H                      | -1.0698 | -2.2415 | 0.6092  | C | 3.1526  | -1.4876 | -0.6090 |
| C | 1.2719  | -3.1160 | 1.1792  | H                      | -1.0491 | -2.1941 | -2.4324 | C | 3.0322  | -2.3707 | -1.6609 |
| C | 0.3631  | -3.5224 | 2.1358  | H                      | 0.2484  | -2.7980 | -1.2776 | C | 1.8151  | -3.0669 | -1.9131 |
| C | -0.2620 | -2.5907 | 3.0178  | C                      | -2.7979 | -1.3975 | -0.4070 | C | 0.7220  | -2.9135 | -1.0852 |
| C | 0.0317  | -1.2446 | 2.9541  | C                      | -3.4983 | -1.1567 | 0.7895  | C | 2.7566  | 0.5649  | 2.0395  |
| C | 3.4450  | -1.4604 | -0.8511 | C                      | -3.4962 | -1.2883 | -1.6228 | C | 3.9113  | 1.1084  | 1.1824  |
| C | 3.2986  | -2.8958 | -1.3664 | C                      | -4.8463 | -0.7934 | 0.7729  | C | 4.5362  | 2.3533  | 1.8147  |
| C | 4.2320  | -3.1530 | -2.5511 | H                      | -2.9690 | -1.2557 | 1.7414  | H | 2.1664  | 1.4129  | 2.4343  |
| H | 3.3878  | -0.7642 | -1.7081 | C                      | -4.8455 | -0.9249 | -1.6405 | H | 3.1828  | 0.0723  | 2.9326  |
| H | 4.4694  | -1.3416 | -0.4528 | H                      | -2.9891 | -1.4789 | -2.5710 | H | 3.5548  | 1.3374  | 0.1621  |
| H | 2.2545  | -3.0911 | -1.6667 | C                      | -5.5264 | -0.6685 | -0.4445 | H | 4.6819  | 0.3290  | 1.0707  |
| H | 3.5303  | -3.6030 | -0.5532 | H                      | -5.3708 | -0.6107 | 1.7134  | H | 4.8880  | 2.1370  | 2.8377  |
| H | 5.2820  | -2.9701 | -2.2661 | H                      | -5.3705 | -0.8476 | -2.5951 | H | 3.7975  | 3.1719  | 1.8836  |
| H | 3.9928  | -2.4793 | -3.3927 | H                      | -6.5802 | -0.3843 | -0.4608 | H | 5.3954  | 2.7147  | 1.2281  |
| H | 4.1514  | -4.1914 | -2.9090 |                        |         |         |         | H | -3.8434 | -1.4266 | 2.6278  |
| H | 1.7580  | 4.5374  | 2.1814  | <b>Cat3-ET-Product</b> |         |         |         | H | -2.2834 | -0.7581 | 3.1930  |
| H | 2.9125  | 3.3668  | 1.4775  | C                      | 0.5115  | -0.7107 | 1.8727  | H | -2.6273 | -2.4950 | 3.3818  |
| H | 2.7141  | 3.4622  | 3.2438  | C                      | 1.8072  | -0.3962 | 1.3690  | H | -3.6015 | -3.8081 | 0.4452  |
| H | -0.5721 | 3.1957  | 4.0466  | C                      | 2.0366  | -1.2745 | 0.2493  | H | -2.0072 | -4.4879 | 0.8848  |
| H | 0.3367  | 1.7778  | 4.6407  | C                      | 0.8215  | -2.0424 | 0.0406  | H | -2.2670 | -3.7695 | -0.7318 |
| H | -1.1386 | 1.5532  | 3.6539  | C                      | -0.1334 | -1.7157 | 1.0826  | H | -2.0379 | 3.4494  | -2.2497 |
| H | -1.5078 | 1.9093  | -3.6623 | H                      | 0.0582  | -0.2091 | 2.7299  | H | -2.5537 | 4.7102  | -0.1712 |
| H | 0.6083  | 2.8754  | -4.5370 | Si                     | -2.0116 | -1.9998 | 1.0306  | H | -2.9195 | 3.5261  | 1.9835  |
| H | 2.4074  | 3.6246  | -2.9951 | C                      | -2.3161 | -0.6213 | -0.2445 | H | -2.8897 | 1.0516  | 2.1104  |
| H | 2.1340  | 3.4765  | -0.5377 | C                      | -1.9329 | -0.7510 | -1.6285 | H | 4.0903  | -0.9630 | -0.4407 |
| H | 1.7404  | -3.8484 | 0.5254  | C                      | -1.7975 | 0.5170  | -2.2372 | H | 3.8862  | -2.5432 | -2.3186 |
| H | 0.1180  | -4.5823 | 2.2268  | C                      | -2.1319 | 1.5034  | -1.2542 | H | 1.7587  | -3.7505 | -2.7624 |
| H | -0.9728 | -2.9572 | 3.7608  | C                      | -2.4343 | 0.8002  | -0.0164 | H | -0.1916 | -3.4844 | -1.2520 |



|                             |         |         |            |         |         |                             |         |         |
|-----------------------------|---------|---------|------------|---------|---------|-----------------------------|---------|---------|
| Zr -0.0331                  | 0.2675  | -0.3452 | C -2.8032  | 1.9030  | 0.4125  | H -2.9040                   | -3.6541 | -2.6395 |
| C 0.9398                    | 2.7196  | -0.2006 | C -0.2466  | -1.8898 | 2.6036  | H -1.0774                   | -1.9986 | -3.0589 |
| H 1.7603                    | 2.3660  | 0.4406  | C 1.1273   | -2.3727 | 2.1133  | H -3.5947                   | -2.0632 | -3.0911 |
| H 0.8930                    | 3.8146  | -0.1085 | C 1.4351   | -3.8106 | 2.5263  |                             |         |         |
| H -0.0459                   | 2.4497  | 0.2721  | H -0.2532  | -1.8717 | 3.7078  | <b>Cat3-12si-BT-Product</b> |         |         |
| H 2.3138                    | 0.4779  | -1.9106 | H -1.0234  | -2.6145 | 2.3037  | C 1.0083                    | 0.5734  | 1.8225  |
| C 1.2770                    | 0.8176  | -2.0415 | H 1.9119   | -1.6925 | 2.4840  | C -0.1038                   | -0.1941 | 2.2580  |
| C 1.1388                    | 2.3357  | -1.7051 | H 1.1772   | -2.2972 | 1.0045  | C -1.2821                   | 0.5657  | 1.9372  |
| H 0.9657                    | 0.6166  | -3.0736 | H 0.6811   | -4.5076 | 2.1216  | C -0.8664                   | 1.7651  | 1.2353  |
| H 2.0653                    | 2.8530  | -2.0061 | H 1.4232   | -3.9053 | 3.6252  | C 0.5822                    | 1.7607  | 1.1302  |
| H 0.3124                    | 2.7828  | -2.2761 | H 2.4270   | -4.1282 | 2.1673  | H 2.0446                    | 0.2583  | 1.9242  |
|                             |         |         | H 2.8666   | 4.1230  | 0.7950  | Si 1.7078                   | 2.6563  | -0.1190 |
| <b>Cat3-12si-PP-Product</b> |         |         | H 2.4908   | 2.8938  | 2.0410  | C 1.6945                    | 1.2087  | -1.3639 |
| C 0.3084                    | 0.5560  | 1.9021  | H 1.6294   | 4.4505  | 2.0449  | C 0.6932                    | 0.9953  | -2.3726 |
| C -0.5878                   | -0.5350 | 2.0486  | H 0.2816   | 4.9722  | -1.1110 | C 0.6150                    | -0.3749 | -2.7200 |
| C -1.8569                   | -0.1004 | 1.5294  | H -0.9427  | 4.8240  | 0.1803  | C 1.6246                    | -1.0711 | -1.9760 |
| C -1.6911                   | 1.2400  | 1.0007  | H -1.0529  | 3.7992  | -1.2800 | C 2.2999                    | -0.0941 | -1.1421 |
| C -0.3133                   | 1.6499  | 1.2035  | H 2.6890   | -2.3918 | -2.4316 | H 0.0265                    | 1.7675  | -2.7527 |
| H 1.3541                    | 0.5299  | 2.2009  | H 4.2837   | -2.7240 | -0.5579 | H -0.0712                   | -0.8158 | -3.4396 |
| Si 0.7133                   | 2.9639  | 0.2842  | H 4.6471   | -0.9524 | 1.1482  | C 3.4027                    | 3.0066  | 0.6071  |
| C 1.3682                    | 1.7253  | -1.0129 | H 3.3972   | 1.1844  | 1.0567  | C 0.8746                    | 4.1504  | -0.8915 |
| C 0.6873                    | 1.3601  | -2.2250 | H -3.2523  | -1.7444 | 1.8823  | C 1.9785                    | -2.4506 | -1.8878 |
| C 1.0858                    | 0.0714  | -2.6558 | H -5.1675  | -0.5280 | 0.8682  | C 2.9844                    | -2.8230 | -1.0197 |
| C 2.0963                    | -0.3963 | -1.7518 | H -4.8916  | 1.7646  | -0.0429 | C 3.6720                    | -1.8610 | -0.2182 |
| C 2.2802                    | 0.6269  | -0.7393 | H -2.6942  | 2.9151  | 0.0226  | C 3.3426                    | -0.5239 | -0.2666 |
| H -0.0919                   | 1.9553  | -2.6987 | Zr -0.0574 | -0.1764 | -0.3957 | C -2.6582                   | 0.3204  | 2.1842  |
| H 0.7119                    | -0.4568 | -3.5302 | C -0.8567  | -2.7422 | -1.0556 | C -3.5821                   | 1.2529  | 1.7557  |
| C 2.0552                    | 3.6700  | 1.3905  | H 0.2372   | -2.5071 | -1.0259 | C -3.1786                   | 2.4337  | 1.0629  |
| C -0.3533                   | 4.2565  | -0.5604 | H -1.2964  | -2.6394 | -0.0440 | C -1.8501                   | 2.6911  | 0.7907  |
| C 2.8202                    | -1.6230 | -1.6671 | H -0.8610  | -3.8183 | -1.2895 | C -0.0458                   | -1.5540 | 2.8960  |
| C 3.7089                    | -1.7981 | -0.6262 | H -1.8919  | 0.1979  | -2.6182 | C 1.0007                    | -2.4550 | 2.2219  |
| C 3.9148                    | -0.7821 | 0.3568  | C -1.8306  | -0.4402 | -1.7260 | C 0.9723                    | -3.8908 | 2.7418  |
| C 3.2184                    | 0.4062  | 0.3142  | C -1.6498  | -1.9355 | -2.1186 | H 0.1864                    | -1.4690 | 3.9724  |
| C -3.1204                   | -0.7439 | 1.4653  | H -2.7605  | -0.3214 | -1.1530 | H -1.0397                   | -2.0303 | 2.8331  |
| C -4.1816                   | -0.0603 | 0.9056  | C -3.0169  | -2.6022 | -2.3241 | H 2.0048                    | -2.0195 | 2.3562  |
| C -4.0232                   | 1.2581  | 0.3824  | H -3.5938  | -2.5788 | -1.3833 | H 0.8329                    | -2.4663 | 1.1223  |

|                            |                             |                           |
|----------------------------|-----------------------------|---------------------------|
| H -0.0157 -4.3524 2.5719   | <b>Cat3-12si-HX-Product</b> | H 4.5269 1.8647 0.3613    |
| H 1.1690 -3.9106 3.8270    | C 1.8601 0.5406 1.5975      | H 4.2939 3.6287 0.3684    |
| H 1.7342 -4.5128 2.2455    | C 0.8142 -0.1133 2.3006     | H 1.9575 4.4370 -2.0619   |
| H 4.1435 3.1884 -0.1908    | C -0.3399 0.7405 2.2143     | H 1.4374 4.8458 -0.4031   |
| H 3.7621 2.1718 1.2313     | C 0.0061 1.8807 1.3868      | H 0.3827 3.8564 -1.4535   |
| H 3.3576 3.9049 1.2474     | C 1.3887 1.7446 0.9658      | H 1.0404 -3.3513 -2.5787  |
| H 1.5439 4.6188 -1.6337    | H 2.8628 0.1347 1.4802      | H 3.0875 -4.1568 -1.4277  |
| H 0.6325 4.9068 -0.1251    | Si 2.2780 2.5029 -0.5375    | H 4.7014 -2.5624 -0.4116  |
| H -0.0598 3.8688 -1.4052   | C 1.8663 1.0333 -1.6847     | H 4.2960 -0.1180 -0.4788  |
| H 1.4769 -3.1875 -2.5188   | C 0.6491 0.8858 -2.4353     | H -1.8977 -0.2211 3.4075  |
| H 3.2786 -3.8725 -0.9541   | C 0.3844 -0.4799 -2.6987    | H -3.5578 1.5696 2.9484   |
| H 4.4793 -2.1967 0.4352    | C 1.4762 -1.2446 -2.1696    | H -2.9767 3.5216 1.5278   |
| H 3.8848 0.2076 0.3331     | C 2.3992 -0.3119 -1.5491    | H -0.7227 3.7472 0.5174   |
| H -2.9705 -0.5714 2.7312   | H -0.0206 1.7051 -2.6913    | Zr 0.3263 -0.1380 -0.1743 |
| H -4.6436 1.0949 1.9562    | H -0.4803 -0.8755 -3.2269   | C -1.4683 -2.2378 0.0814  |
| H -3.9420 3.1485 0.7500    | C 4.1157 2.7091 -0.2161     | H -0.4563 -2.4468 -0.3472 |
| H -1.5507 3.6019 0.2720    | C 1.4304 4.0533 -1.1713     | H -1.3758 -1.9111 1.1356  |
| Zr -0.0302 -0.1474 -0.2653 | C 1.7290 -2.6475 -2.1062    | H -1.9269 -3.2387 0.1055  |
| C -1.6500 -2.3858 -0.4638  | C 2.8714 -3.0873 -1.4695    | H -2.0539 0.7839 -1.5536  |
| H -0.5526 -2.4998 -0.6489  | C 3.7971 -2.1716 -0.8818    | C -1.8247 0.2153 -0.6431  |
| H -1.8298 -2.0862 0.5872   | C 3.5745 -0.8119 -0.9110    | C -2.3244 -1.2533 -0.7574 |
| H -2.0145 -3.4204 -0.5605  | C -1.6420 0.6260 2.7679     | H -2.3278 0.7066 0.2011   |
| H -2.1162 0.6476 -2.1194   | C -2.5582 1.6270 2.5130     | C -3.7918 -1.3720 -0.3085 |
| C -2.0467 0.0543 -1.1986   | C -2.2238 2.7494 1.6970     | H -3.8567 -1.0814 0.7572  |
| C -2.3675 -1.4436 -1.4654  | C -0.9728 2.8798 1.1287     | C -4.7570 -0.5199 -1.1307 |
| H -2.7680 0.4583 -0.4746   | C 0.9007 -1.4635 2.9558     | H -4.0958 -2.4341 -0.3686 |
| C -3.8839 -1.7072 -1.3920  | C 1.6852 -2.4615 2.0892     | H -4.6635 -0.7906 -2.1999 |
| H -4.2264 -1.4730 -0.3669  | C 1.6433 -3.8871 2.6351     | H -4.4708 0.5438 -1.0508  |
| C -4.6830 -0.8960 -2.4112  | H 1.3801 -1.3876 3.9478     | C -6.2126 -0.6866 -0.6886 |
| H -4.0582 -2.7874 -1.5502  | H -0.1179 -1.8485 3.1357    | H -6.2954 -0.4252 0.3830  |
| H -4.3375 -1.1084 -3.4382  | H 2.7285 -2.1206 1.9861     | C -7.1734 0.1749 -1.5103  |
| H -4.5719 0.1858 -2.2322   | H 1.2774 -2.4611 1.0537     | H -6.4978 -1.7515 -0.7709 |
| H -2.0176 -1.7167 -2.4755  | H 0.6047 -4.2554 2.6962     | H -7.1217 -0.0918 -2.5805 |
| H -5.7550 -1.1437 -2.3560  | H 2.0715 -3.9216 3.6510     | H -6.9167 1.2453 -1.4197  |
|                            | H 2.2183 -4.5782 1.9986     | H -8.2162 0.0459 -1.1782  |
|                            | H 4.6759 2.7887 -1.1639     | H -2.2562 -1.5791 -1.8092 |

|                             |                           |                           |
|-----------------------------|---------------------------|---------------------------|
| <b>Cat3-21si-ST-Product</b> | H 2.5247 3.9598 -0.6189   | C 1.1700 -0.3430 -2.3220  |
| C 1.9470 1.2583 1.1727      | H 1.4105 5.1830 0.0390    | C 2.2430 -0.3480 -1.3740  |
| C 1.8820 0.1444 2.0432      | H -1.8058 4.2916 -1.1290  | C 2.0400 0.7800 -0.4770   |
| C 0.5636 0.1377 2.6171      | H -1.6718 4.3482 0.6501   | C 0.8440 1.4820 -0.8770   |
| C -0.1731 1.2546 2.0552     | H -2.2769 2.8698 -0.1593  | H -0.5640 1.0230 -2.5650  |
| C 0.6786 1.9384 1.1009      | H 1.6169 -2.4232 -3.1976  | Si -0.2380 2.6370 0.1720  |
| H 2.8278 1.5193 0.5892      | H 4.0284 -1.8420 -3.0898  | C -1.1860 1.2000 0.9790   |
| Si 0.2063 3.0518 -0.3685    | H 4.7735 0.4168 -2.3659   | C -0.6850 0.4220 2.0700   |
| C 0.2331 1.6100 -1.6170     | H 3.1300 2.1456 -1.6843   | C -1.3450 -0.8360 2.1330  |
| C -0.8902 0.7613 -1.9004    | H 0.5114 -1.5467 4.0089   | C -2.3560 -0.8460 1.1140  |
| C -0.4583 -0.4993 -2.3739   | H -1.8174 -1.0619 4.7320  | C -2.2300 0.3920 0.3730   |
| C 0.9717 -0.4611 -2.4742    | H -3.0667 0.8749 3.8113   | H 0.1330 0.7300 2.7240    |
| C 1.4044 0.8461 -2.0153     | H -2.0504 2.3658 2.1065   | H -1.1940 -1.6070 2.8870  |
| H -1.9288 1.0065 -1.6885    | Zr 0.3931 -0.2292 -0.0006 | C -1.3090 3.7280 -0.9160  |
| H -1.1120 -1.3288 -2.6282   | C -0.0985 -3.2516 -0.4922 | C 0.7300 3.5850 1.4720    |
| C 1.5029 4.3668 -0.6988     | H 0.8423 -2.7000 -0.7021  | C -3.3540 -1.7920 0.7620  |
| C -1.5519 3.6980 -0.2336    | H 0.2303 -4.2751 -0.2511  | C -4.1750 -1.5180 -0.3120 |
| C 1.9386 -1.4410 -2.8464    | H -0.6560 -3.2756 -1.4378 | C -4.0350 -0.3140 -1.0650 |
| C 3.2772 -1.1088 -2.7886    | C -1.5524 -1.2639 0.5472  | C -3.0820 0.6300 -0.7450  |
| C 3.7062 0.1871 -2.3682     | C -0.9460 -2.6907 0.6749  | C 3.3870 -1.1860 -1.2190  |
| C 2.7977 1.1511 -1.9843     | H -1.7739 -0.9223 1.5657  | C 4.2850 -0.9060 -0.2100  |
| C -0.0448 -0.7112 3.5789    | H -1.7814 -3.3943 0.8409  | C 4.0780 0.1900 0.6860    |
| C -1.3359 -0.4328 3.9810    | H -0.3418 -2.7262 1.5999  | C 2.9740 1.0110 0.5790    |
| C -2.0550 0.6811 3.4503     | C -2.8010 -1.1215 -0.2589 | H -2.1810 4.1080 -0.3560  |
| C -1.4987 1.5115 2.4985     | C -3.6021 0.0249 -0.0673  | H -1.6760 3.1910 -1.8070  |
| C 2.9573 -0.8905 2.2164     | C -3.2365 -2.0657 -1.2052 | H -0.7230 4.5950 -1.2680  |
| C 2.8250 -1.9691 1.1264     | C -4.7644 0.2350 -0.8094  | H 0.0590 4.2810 2.0050    |
| C 3.9476 -3.0082 1.1343     | H -3.2978 0.7552 0.6861   | H 1.5370 4.1780 1.0090    |
| H 3.9494 -0.4165 2.1441     | C -4.4038 -1.8584 -1.9518 | H 1.1800 2.9140 2.2220    |
| H 2.8911 -1.3622 3.2100     | H -2.6779 -2.9903 -1.3541 | H -3.4680 -2.7140 1.3360  |
| H 2.8246 -1.4736 0.1262     | C -5.1691 -0.7049 -1.7671 | H -4.9540 -2.2290 -0.5930 |
| H 1.8531 -2.4808 1.2523     | H -5.3646 1.1312 -0.6348  | H -4.7110 -0.1350 -1.9040 |
| H 3.9756 -3.5311 2.1047     | H -4.7181 -2.6125 -2.6770 | H -3.0040 1.5620 -1.3050  |
| H 4.9248 -2.5210 0.9820     | H -6.0782 -0.5449 -2.3499 | H 3.5630 -2.0090 -1.9150  |
| H 3.8068 -3.7597 0.3414     | <b>CAT-1-REACTANT</b>     | H 5.1810 -1.5200 -0.0950  |
| H 1.3790 4.7971 -1.7078     | C 0.3490 0.7690 -2.0270   | H 4.8200 0.3830 1.4630    |

|                           |                           |                           |
|---------------------------|---------------------------|---------------------------|
| H 2.8410 1.8600 1.2490    | C 4.2810 -1.0400 -0.0470  | H -0.0750 0.4080 2.8270   |
| Zr 0.0270 -0.6990 -0.0330 | C 4.0820 0.0900 0.8030    | Si 0.8860 2.5710 0.6010   |
| C -0.9900 -2.2400 -1.2900 | C 3.0080 0.9410 0.6290    | C 1.6120 1.2820 -0.5920   |
| H -0.2830 -2.7020 -2.0010 | H -2.0090 4.1710 -0.6260  | C 1.0140 0.9890 -1.8620   |
| H -1.4120 -3.0190 -0.6320 | H -1.4950 3.1490 -2.0000  | C 1.4380 -0.2800 -2.3290  |
| H -1.8290 -1.8070 -1.8630 | H -0.5080 4.5500 -1.5200  | C 2.3890 -0.7980 -1.3870  |
| H 2.5220 -1.5460 1.5980   | H 0.1770 4.3980 1.8040    | C 2.5000 0.1640 -0.3110   |
| C 1.6490 -2.1980 1.7040   | H 1.6670 4.1990 0.8390    | H 0.2950 1.6280 -2.3720   |
| C 1.3150 -3.0640 0.7260   | H 1.2530 3.0110 2.1110    | H 1.1920 -0.7250 -3.2900  |
| H 1.0940 -2.1620 2.6440   | H -3.5540 -2.5160 1.4060  | C 1.9060 2.7730 2.1640    |
| H 1.9160 -3.1390 -0.1850  | H -4.9020 -2.1500 -0.6460 | C 0.5130 4.1890 -0.2770   |
| H 0.4600 -3.7390 0.8250   | H -4.5500 -0.1460 -2.0710 | C 3.1690 -1.9830 -1.3740  |
| H 1.0280 -1.0470 -3.1380  | H -2.8770 1.5790 -1.4670  | C 4.0370 -2.1890 -0.3190  |
|                           | H 3.5640 -2.1960 -1.7210  | C 4.1500 -1.2450 0.7430   |
| <b>CAT-1-TS</b>           | H 5.1560 -1.6730 0.1140   | C 3.3960 -0.0890 0.7630   |
| C 0.4240 0.6540 -2.0110   | H 4.8060 0.2900 1.5950    | C -3.6550 -0.3250 -0.1580 |
| C 1.2020 -0.5170 -2.2130  | H 2.8820 1.8190 1.2630    | C -4.0550 0.3690 -1.2810  |
| C 2.2810 -0.4850 -1.2700  | Zr -0.0110 -0.6590 0.0390 | C -3.3100 1.4810 -1.7770  |
| C 2.0940 0.6880 -0.4360   | C -0.7830 -2.6250 -0.8860 | C -2.1730 1.9180 -1.1290  |
| C 0.9250 1.4130 -0.9000   | H -0.3660 -3.2020 -1.7200 | C -2.2370 -1.4910 2.6620  |
| H -0.4700 0.9120 -2.5800  | H -1.5900 -3.1710 -0.3850 | C -2.7110 -2.8130 2.0440  |
| Si -0.1400 2.6690 0.0550  | H -1.2760 -1.7180 -1.3670 | H -1.3930 -1.6930 3.3420  |
| C -1.1750 1.3310 0.9250   | H 2.2960 -1.7400 1.2300   | H -3.0500 -1.0900 3.2960  |
| C -0.7370 0.6010 2.0830   | C 1.2720 -2.1040 1.3490   | H -1.9220 -3.2910 1.4420  |
| C -1.4420 -0.6240 2.2000  | C 0.8320 -3.1140 0.4630   | H -3.5990 -2.6840 1.4060  |
| C -2.3930 -0.6820 1.1320  | H 0.8670 -2.1000 2.3640   | H 2.9200 3.1390 1.9290    |
| C -2.2100 0.5130 0.3250   | H 1.4930 -3.3970 -0.3600  | H 2.0010 1.8210 2.7120    |
| H 0.0630 0.9200 2.7530    | H 0.1600 -3.8970 0.8190   | H 1.4270 3.5060 2.8360    |
| H -1.3250 -1.3600 2.9920  | H 1.0570 -1.2580 -2.9970  | H 1.4370 4.7840 -0.3720   |
| C -1.1350 3.7280 -1.1330  |                           | H -0.2220 4.7830 0.2930   |
| C 0.8350 3.6560 1.3190    | <b>CAT-2-REACTANT</b>     | H 0.1150 4.0280 -1.2920   |
| C -3.3860 -1.6400 0.7760  | C -0.7550 0.5110 1.9830   | H 3.1010 -2.6990 -2.1950  |
| C -4.1310 -1.4310 -0.3630 | C -1.8140 -0.3950 1.7190  | H 4.6610 -3.0850 -0.2990  |
| C -3.9300 -0.2760 -1.1820 | C -2.4750 0.0870 0.5300   | H 4.8570 -1.4420 1.5510   |
| C -2.9950 0.6830 -0.8580  | C -1.7460 1.2490 0.0560   | H 3.5010 0.6340 1.5720    |
| C 3.3980 -1.3390 -1.0650  | C -0.6550 1.5230 0.9700   | H -4.2560 -1.1530 0.2180  |

|                           |                           |                           |
|---------------------------|---------------------------|---------------------------|
| H -4.9710 0.0730 -1.7980  | C 3.0430 -0.2340 1.1180   | H -2.6400 -3.7630 2.7110  |
| H -3.6650 2.0070 -2.6650  | C -3.5760 -0.4410 0.1230  |                           |
| H -1.6340 2.7980 -1.4800  | C -4.1810 0.3640 -0.8210  | <b>CAT-3-REACTANT</b>     |
| Zr 0.0240 -0.5360 -0.1580 | C -3.5900 1.5910 -1.2480  | C 0.6970 0.3410 -1.9190   |
| C 0.8670 -2.0200 1.2680   | C -2.3920 2.0240 -0.7200  | C 1.9150 -0.1220 -1.3580  |
| H 0.0550 -2.7700 1.3660   | C -1.6340 -1.8500 2.5330  | C 2.2570 0.8060 -0.3070   |
| H 1.7690 -2.5080 0.8680   | C -2.7030 -2.8550 2.0920  | C 1.1880 1.7840 -0.2130   |
| H 1.0830 -1.6490 2.2820   | H -0.6560 -2.3570 2.6060  | C 0.1970 1.4950 -1.2280   |
| H -2.0970 -0.8190 -2.4400 | H -1.8670 -1.5190 3.5610  | H 0.1870 -0.1600 -2.7400  |
| C -1.3840 -1.6490 -2.3770 | H -2.5820 -3.1540 1.0380  | Si -1.6070 2.0920 -1.2550 |
| C -1.4060 -2.5020 -1.3310 | H -3.7150 -2.4410 2.2140  | C -2.1230 0.9520 0.1750   |
| H -0.6910 -1.7920 -3.2070 | H 2.9440 3.3200 1.8920    | C -1.6730 1.1560 1.5220   |
| H -2.1660 -2.4170 -0.5510 | H 1.9910 2.1360 2.8360    | C -1.8020 -0.0390 2.2730  |
| H -0.7140 -3.3500 -1.2760 | H 1.4430 3.8250 2.7210    | C -2.4120 -1.0250 1.4280  |
| H -2.9870 -3.5170 2.8440  | H 1.2820 4.8010 -0.4970   | C -2.6090 -0.4180 0.1280  |
|                           | H -0.3660 4.7130 0.1880   | H -1.2480 2.0840 1.9010   |
| <b>CAT-2-TS</b>           | H 0.0160 3.8820 -1.3500   | H -1.5960 -0.1560 3.3340  |
| C -0.4080 0.3190 1.8880   | H 3.2320 -2.6960 -1.9770  | C -2.4040 1.6210 -2.8880  |
| C -1.4630 -0.6140 1.6850  | H 4.2560 -3.3000 0.2020   | C -1.8170 3.9010 -0.7990  |
| C -2.3390 -0.0280 0.6980  | H 4.1340 -1.7590 2.1480   | C -2.8250 -2.3610 1.6660  |
| C -1.7540 1.2390 0.2860   | H 3.0310 0.4520 1.9640    | C -3.4220 -3.0610 0.6350  |
| C -0.5390 1.4680 1.0390   | H -4.0540 -1.3670 0.4340  | C -3.6130 -2.4700 -0.6480 |
| H 0.4160 0.1560 2.5840    | H -5.1370 0.0610 -1.2510  | C -3.2120 -1.1750 -0.9130 |
| Si 0.9190 2.6170 0.6190   | H -4.1050 2.1970 -1.9960  | C 3.3980 0.9350 0.5400    |
| C 1.7580 1.3580 -0.5340   | H -1.9560 2.9750 -1.0240  | C 3.4450 1.9710 1.4510    |
| C 1.3700 1.1300 -1.8980   | Zr 0.0290 -0.4030 -0.4310 | C 2.3720 2.9040 1.5770    |
| C 1.7800 -0.1580 -2.3270  | C 0.1610 -2.6820 -0.0980  | C 1.2580 2.8170 0.7690    |
| C 2.4940 -0.7690 -1.2480  | H -0.5020 -3.3310 0.4840  | C 2.7260 -1.2450 -1.9460  |
| C 2.4560 0.1550 -0.1270   | H 0.8920 -3.2620 -0.6700  | C 3.5060 -2.1550 -0.9870  |
| H 0.7970 1.8310 -2.5060   | H 0.7630 -2.1080 0.6800   | C 4.2000 -3.2860 -1.7500  |
| H 1.6340 -0.5830 -3.3190  | H -2.2400 -0.4510 -2.0830 | H 2.0460 -1.8700 -2.5490  |
| C 1.9200 3.0040 2.1590    | C -1.3220 -1.0300 -2.2220 | H 3.4470 -0.8050 -2.6610  |
| C 0.4090 4.1410 -0.3520   | C -1.2780 -2.3250 -1.6510 | H 2.8220 -2.5870 -0.2370  |
| C 3.1640 -2.0210 -1.1210  | H -0.7710 -0.8590 -3.1490 | H 4.2610 -1.5750 -0.4330  |
| C 3.7300 -2.3500 0.0900   | H -2.1120 -2.6270 -1.0140 | H 4.8990 -2.8780 -2.4990  |
| C 3.6620 -1.4620 1.2100   | H -0.7680 -3.1340 -2.1760 | H 3.4610 -3.9070 -2.2840  |

|                 |         |         |         |   |         |         |         |                       |         |         |         |
|-----------------|---------|---------|---------|---|---------|---------|---------|-----------------------|---------|---------|---------|
| H               | 4.7700  | -3.9380 | -1.0700 | C | 2.1000  | 0.8320  | -1.6110 | H                     | -4.1330 | 0.5270  | -0.1450 |
| H               | -3.5040 | 1.6820  | -2.8220 | C | 2.0120  | -0.4270 | -2.2580 | H                     | -4.3090 | 2.5180  | -1.5810 |
| H               | -2.1320 | 0.5960  | -3.1910 | C | 2.2660  | -1.4380 | -1.2780 | H                     | -2.4120 | 4.1070  | -1.8300 |
| H               | -2.0710 | 2.3090  | -3.6840 | C | 2.4500  | -0.7670 | -0.0030 | H                     | -0.2870 | 3.7510  | -0.5950 |
| H               | -2.8700 | 4.2020  | -0.9400 | H | 1.9430  | 1.7920  | -2.1040 | Zr                    | 0.0680  | -0.1980 | -0.5580 |
| H               | -1.1870 | 4.5430  | -1.4380 | H | 1.8440  | -0.5940 | -3.3200 | C                     | -0.7770 | -2.3380 | -0.6800 |
| H               | -1.5550 | 4.0950  | 0.2540  | C | 2.7950  | 1.6680  | 2.7610  | H                     | -1.7240 | -2.7250 | -0.2880 |
| H               | -2.6960 | -2.8130 | 2.6520  | C | 2.2270  | 3.6930  | 0.4250  | H                     | -0.2640 | -3.0820 | -1.2990 |
| H               | -3.7640 | -4.0840 | 0.8020  | C | 2.3530  | -2.8580 | -1.3580 | H                     | -0.1190 | -2.1920 | 0.2380  |
| H               | -4.0970 | -3.0550 | -1.4320 | C | 2.5690  | -3.5760 | -0.2030 | H                     | -1.7830 | 0.9670  | -2.3240 |
| H               | -3.3790 | -0.7270 | -1.8930 | C | 2.7130  | -2.9240 | 1.0620  | C                     | -1.1500 | 0.0980  | -2.5220 |
| H               | 4.2390  | 0.2500  | 0.4460  | C | 2.6570  | -1.5520 | 1.1750  | C                     | -1.6910 | -1.1800 | -2.2420 |
| H               | 4.3270  | 2.0900  | 2.0830  | C | -3.2860 | 1.2010  | -0.2410 | H                     | -0.4420 | 0.1850  | -3.3500 |
| H               | 2.4520  | 3.7120  | 2.3070  | C | -3.3790 | 2.3210  | -1.0440 | H                     | -2.6680 | -1.2240 | -1.7550 |
| H               | 0.4610  | 3.5580  | 0.8350  | C | -2.2920 | 3.2340  | -1.1860 | H                     | -1.4490 | -2.0260 | -2.8880 |
| Zr              | -0.0490 | -0.3410 | 0.3720  | C | -1.1060 | 3.0370  | -0.5100 |                       |         |         |         |
| C               | -0.1960 | -2.3300 | -0.6180 | C | -2.4200 | -1.2560 | 1.9380  | <b>CAT-4-REACTANT</b> |         |         |         |
| H               | 0.7850  | -2.7970 | -0.3880 | C | -3.7200 | -1.6550 | 1.2300  | C                     | 1.1740  | 0.4410  | -1.8340 |
| H               | -1.0010 | -2.9510 | -0.1990 | C | -4.2490 | -2.9900 | 1.7580  | C                     | 2.2500  | -0.1530 | -1.1230 |
| H               | -0.2900 | -2.3140 | -1.7150 | H | -1.7430 | -2.1300 | 1.9660  | C                     | 2.4820  | 0.6820  | 0.0290  |
| H               | 1.7210  | 0.6330  | 2.7630  | H | -2.6550 | -1.0390 | 2.9960  | C                     | 1.5220  | 1.7780  | -0.0160 |
| C               | 1.2620  | -0.3490 | 2.9110  | H | -3.5560 | -1.7200 | 0.1400  | C                     | 0.7000  | 1.6370  | -1.1900 |
| C               | 1.6480  | -1.4110 | 2.1710  | H | -4.4780 | -0.8700 | 1.3860  | H                     | 0.7530  | 0.0190  | -2.7470 |
| H               | 0.5180  | -0.4520 | 3.7010  | H | -4.4180 | -2.9390 | 2.8470  | Si                    | -1.0100 | 2.3940  | -1.5120 |
| H               | 2.4630  | -1.3260 | 1.4480  | H | -3.5230 | -3.8010 | 1.5710  | C                     | -1.9230 | 1.0710  | -0.5040 |
| H               | 1.2100  | -2.4030 | 2.3300  | H | -5.2010 | -3.2640 | 1.2770  | C                     | -2.0220 | 1.0590  | 0.9260  |
|                 |         |         |         | H | 3.8870  | 1.5760  | 2.6300  | C                     | -2.3280 | -0.2430 | 1.4120  |
| <b>CAT-3-TS</b> |         |         |         | H | 2.4270  | 0.7540  | 3.2560  | C                     | -2.4890 | -1.0860 | 0.2550  |
| C               | -0.3530 | 0.2760  | 1.8260  | H | 2.6010  | 2.5150  | 3.4410  | C                     | -2.2140 | -0.2880 | -0.9210 |
| C               | -1.6560 | -0.0830 | 1.3790  | H | 3.3020  | 3.9400  | 0.4630  | H                     | -1.8480 | 1.9250  | 1.5680  |
| C               | -2.0780 | 0.9610  | 0.4770  | H | 1.6810  | 4.4490  | 1.0150  | C                     | -1.4160 | 2.3530  | -3.3450 |
| C               | -0.9820 | 1.9120  | 0.3580  | H | 1.9020  | 3.7730  | -0.6260 | C                     | -1.2390 | 4.0880  | -0.7320 |
| C               | 0.1070  | 1.4890  | 1.2130  | H | 2.2580  | -3.3600 | -2.3240 | C                     | -2.8670 | -2.4470 | 0.1250  |
| H               | 0.2320  | -0.3250 | 2.5230  | H | 2.6480  | -4.6640 | -0.2470 | C                     | -2.9300 | -2.9980 | -1.1390 |
| Si              | 1.9450  | 1.9690  | 1.1140  | H | 2.8930  | -3.5310 | 1.9510  | C                     | -2.6290 | -2.2260 | -2.3000 |
| C               | 2.3560  | 0.6650  | -0.2070 | H | 2.8070  | -1.0620 | 2.1380  | C                     | -2.2690 | -0.8970 | -2.2080 |

|    |         |         |         |                 |         |         |         |    |         |         |         |
|----|---------|---------|---------|-----------------|---------|---------|---------|----|---------|---------|---------|
| C  | 3.4430  | 0.6460  | 1.0880  | H               | -0.2760 | -0.3620 | 3.4000  | C  | 3.9040  | -2.0390 | -0.6650 |
| C  | 3.4250  | 1.6330  | 2.0500  | H               | 2.2750  | -1.5040 | 2.0550  | C  | 4.3720  | -3.3670 | -1.2630 |
| C  | 2.4580  | 2.6860  | 2.0240  | H               | 0.7890  | -2.4730 | 2.6400  | H  | 2.2120  | -2.0220 | -2.0110 |
| C  | 1.5120  | 2.7580  | 1.0250  | C               | -2.7040 | -0.6230 | 2.8150  | H  | 3.5370  | -0.9780 | -2.5020 |
| C  | 3.0290  | -1.3330 | -1.6380 | C               | -4.2320 | -0.7330 | 2.9730  | H  | 3.4050  | -2.2180 | 0.3040  |
| C  | 3.9170  | -2.0820 | -0.6370 | H               | -2.3200 | 0.1340  | 3.5190  | H  | 4.7780  | -1.4020 | -0.4530 |
| C  | 4.4140  | -3.4050 | -1.2220 | H               | -2.2390 | -1.5880 | 3.0850  | H  | 4.8710  | -3.2030 | -2.2330 |
| H  | 2.3130  | -2.0430 | -2.0880 | H               | -4.4950 | -1.0150 | 4.0050  | H  | 3.5160  | -4.0420 | -1.4390 |
| H  | 3.6640  | -0.9830 | -2.4730 | H               | -4.7130 | 0.2300  | 2.7380  | H  | 5.0830  | -3.8810 | -0.5970 |
| H  | 3.3560  | -2.2730 | 0.2950  | H               | -4.6420 | -1.4930 | 2.2880  | H  | -2.4640 | 2.6030  | -3.4390 |
| H  | 4.7810  | -1.4520 | -0.3670 |                 |         |         |         | H  | -0.9920 | 1.6430  | -3.7760 |
| H  | 4.9710  | -3.2310 | -2.1580 | <b>CAT-4-TS</b> |         |         |         | H  | -0.8950 | 3.4190  | -3.7010 |
| H  | 3.5660  | -4.0710 | -1.4550 | C               | 1.1590  | 0.5340  | -1.7820 | H  | -2.2430 | 4.5450  | -0.8100 |
| H  | 5.0820  | -3.9290 | -0.5210 | C               | 2.2170  | -0.1070 | -1.0770 | H  | -0.4810 | 4.8380  | -0.8180 |
| H  | -2.5060 | 2.4060  | -3.5090 | C               | 2.4830  | 0.7050  | 0.0840  | H  | -1.2470 | 3.9990  | 0.5630  |
| H  | -1.0360 | 1.4390  | -3.8290 | C               | 1.5280  | 1.8050  | 0.0820  | H  | -3.0240 | -3.1090 | 0.8400  |
| H  | -0.9500 | 3.2170  | -3.8510 | C               | 0.6980  | 1.7090  | -1.0990 | H  | -2.9760 | -4.0540 | -1.4590 |
| H  | -2.2130 | 4.5110  | -1.0350 | H               | 0.7340  | 0.1510  | -2.7100 | H  | -2.4190 | -2.6270 | -3.4160 |
| H  | -0.4470 | 4.7840  | -1.0610 | Si              | -1.0160 | 2.4730  | -1.4110 | H  | -1.9410 | -0.2120 | -3.1500 |
| H  | -1.2240 | 4.0410  | 0.3690  | C               | -1.9570 | 1.0960  | -0.5010 | H  | 4.2010  | -0.1610 | 1.1320  |
| H  | -3.1010 | -3.0410 | 1.0100  | C               | -2.1050 | 1.0250  | 0.9290  | H  | 4.1960  | 1.5370  | 2.9140  |
| H  | -3.2240 | -4.0420 | -1.2600 | C               | -2.3890 | -0.2980 | 1.3540  | H  | 2.5120  | 3.3680  | 2.9530  |
| H  | -2.7010 | -2.6990 | -3.2810 | C               | -2.4620 | -1.1050 | 0.1700  | H  | 0.8140  | 3.5700  | 1.1540  |
| H  | -2.0710 | -0.3080 | -3.1030 | C               | -2.1800 | -0.2540 | -0.9720 | Zr | -0.0080 | -0.1910 | 0.2680  |
| H  | 4.1970  | -0.1380 | 1.1230  | H               | -1.9770 | 1.8680  | 1.6110  | C  | 0.4630  | -2.4440 | 0.1640  |
| H  | 4.1700  | 1.6180  | 2.8480  | C               | -1.3780 | 2.5340  | -3.2530 | H  | 1.4290  | -2.9170 | -0.0350 |
| H  | 2.4840  | 3.4500  | 2.8030  | C               | -1.2640 | 4.1150  | -0.5330 | H  | -0.2950 | -3.1800 | 0.4530  |
| H  | 0.7970  | 3.5800  | 0.9880  | C               | -2.7660 | -2.4840 | -0.0180 | H  | 0.1230  | -2.0350 | -0.8420 |
| Zr | 0.0220  | -0.2240 | 0.2720  | C               | -2.7380 | -3.0010 | -1.2940 | H  | 1.4250  | 0.2880  | 2.6430  |
| C  | 0.2890  | -2.3890 | -0.2300 | C               | -2.4200 | -2.1790 | -2.4200 | C  | 0.6190  | -0.4370 | 2.4970  |
| H  | 1.3400  | -2.7090 | -0.2280 | C               | -2.1440 | -0.8350 | -2.2790 | C  | 0.9820  | -1.7560 | 2.1340  |
| H  | -0.2860 | -3.0200 | 0.4680  | C               | 3.4520  | 0.6280  | 1.1260  | H  | -0.2740 | -0.3080 | 3.1110  |
| H  | -0.1280 | -2.5620 | -1.2390 | C               | 3.4450  | 1.5830  | 2.1230  | H  | 2.0380  | -1.9670 | 1.9480  |
| H  | 1.2160  | 0.6000  | 2.7910  | C               | 2.4810  | 2.6350  | 2.1450  | H  | 0.3920  | -2.5970 | 2.5030  |
| C  | 0.6900  | -0.3560 | 2.8940  | C               | 1.5290  | 2.7470  | 1.1530  | C  | -2.7350 | -0.7560 | 2.7400  |
| C  | 1.2790  | -1.5050 | 2.5050  | C               | 2.9560  | -1.3040 | -1.6190 | C  | -4.2520 | -0.9510 | 2.9070  |

H -2.3750 -0.0140 3.4720  
H -2.2160 -1.7060 2.9610  
H -4.4890 -1.2970 3.9260  
H -4.7860 -0.0040 2.7260  
H -4.6320 -1.6960 2.1890

**CAT-5-REACTANT**

C -0.4430 -0.6280 -1.9070  
C -1.7190 -0.5860 -1.2920  
C -1.6970 -1.5690 -0.2360  
C -0.3650 -2.1420 -0.1900  
C 0.4370 -1.5480 -1.2410  
H -0.1600 0.0040 -2.7470  
Si 2.3360 -1.5350 -1.3320  
C 2.5110 -0.3280 0.1270  
C 2.1580 -0.6900 1.4700  
C 1.9240 0.4690 2.2500  
C 2.2000 1.6140 1.4280  
C 2.5700 1.1260 0.1160  
H 2.0330 -1.7100 1.8280  
H 1.7040 0.4930 3.3140  
C 2.8840 -0.7830 -2.9630  
C 3.1290 -3.1950 -0.9570  
C 2.1850 3.0070 1.6970  
C 2.5440 3.8770 0.6860  
C 2.9140 3.4010 -0.6060  
C 2.9250 2.0520 -0.9010  
C -2.7030 -2.0600 0.6470  
C -2.3770 -3.0500 1.5520  
C -1.0540 -3.5810 1.6310  
C -0.0600 -3.1400 0.7820  
C -2.8950 0.1870 -1.8270  
C -3.8040 0.9000 -0.8180  
C -4.9700 1.6140 -1.5070  
H -2.5170 0.9300 -2.5490  
H -3.5190 -0.5150 -2.4130

H -3.2250 1.6430 -0.2420  
H -4.2130 0.1840 -0.0840  
H -5.5540 0.8740 -2.0830  
H -4.5660 2.3340 -2.2420  
H 3.9510 -0.5030 -2.9300  
H 2.2980 0.1180 -3.2110  
H 2.7480 -1.5120 -3.7800  
H 4.2180 -3.1350 -1.1280  
H 2.7200 -3.9830 -1.6120  
H 2.9740 -3.5000 0.0910  
H 1.9250 3.3760 2.6910  
H 2.5580 4.9520 0.8770  
H 3.2030 4.1230 -1.3720  
H 3.2210 1.6960 -1.8870  
H -3.7250 -1.6890 0.5830  
H -3.1480 -3.4490 2.2140  
H -0.8390 -4.3690 2.3550  
H 0.9350 -3.5850 0.8100  
Zr 0.1460 0.2690 0.3610  
C -0.2620 2.1850 -0.6980  
H -1.3550 2.3330 -0.5890  
H 0.2750 3.0270 -0.2310  
H -0.0440 2.1840 -1.7770  
H -1.2120 -1.1410 2.7980  
C -1.0860 -0.0600 2.9200  
C -1.7800 0.8090 2.1530  
H -0.4180 0.2910 3.7070  
H -2.5240 0.4580 1.4350  
H -1.6760 1.8920 2.2870  
C -5.8780 2.3370 -0.5100  
H -6.3090 1.6260 0.2180  
H -5.3130 3.0990 0.0570  
H -6.7110 2.8450 -1.0200

**CAT-5-TS**

C 0.1290 -0.3870 1.8000  
C 1.4550 -0.4690 1.2880  
C 1.4780 -1.6100 0.4050  
C 0.1330 -2.1650 0.3630  
C -0.7210 -1.4030 1.2490  
H -0.2000 0.3820 2.5000  
Si -2.6190 -1.2730 1.2470  
C -2.6630 0.0610 -0.1070  
C -2.5420 -0.2140 -1.5120  
C -2.1000 0.9370 -2.2120  
C -1.9720 2.0000 -1.2630  
C -2.2940 1.4530 0.0450  
H -2.7170 -1.1880 -1.9710  
H -1.9420 1.0160 -3.2860  
C -3.2410 -0.6690 2.9130  
C -3.4720 -2.8350 0.6460  
C -1.6150 3.3730 -1.3970  
C -1.5360 4.1510 -0.2630  
C -1.8110 3.6090 1.0320  
C -2.1820 2.2930 1.1970  
C 2.5110 -2.2350 -0.3530  
C 2.2050 -3.3400 -1.1230  
C 0.8790 -3.8620 -1.1900  
C -0.1480 -3.2860 -0.4730  
C 2.5780 0.4080 1.7780  
C 3.8950 0.3710 0.9980  
C 4.8500 1.4830 1.4390  
H 2.2130 1.4500 1.8180  
H 2.7880 0.1350 2.8290  
H 3.7050 0.4640 -0.0860  
H 4.3880 -0.6050 1.1440  
H 5.0200 1.3990 2.5270  
H 4.3600 2.4620 1.2780  
H -4.2470 -0.2250 2.8180  
H -2.5700 0.0860 3.3540



|                           |                           |                           |
|---------------------------|---------------------------|---------------------------|
| H -3.3020 -1.5140 3.6200  | C 2.7710 0.1260 0.0120    | H -3.0370 -2.4810 0.6820  |
| H -4.5660 -2.7230 0.7420  | C 2.5840 -0.3540 1.3520   | H -2.0340 -4.1590 2.1880  |
| H -3.1630 -3.7080 1.2470  | C 2.1680 0.6990 2.2020    | H 0.4150 -4.6030 2.1750   |
| H -3.2480 -3.0460 -0.4130 | C 2.1540 1.9090 1.4280    | H 1.9110 -3.4140 0.5950   |
| H -1.4180 3.7960 -2.3840  | C 2.5270 1.5590 0.0730    | Zr 0.3520 0.2120 0.4030   |
| H -1.2720 5.2070 -0.3470  | H 2.6960 -1.3920 1.6620   | C -0.5200 2.0530 -0.4930  |
| H -1.7450 4.2650 1.9030   | H 2.0150 0.6340 3.2770    | H -1.6080 1.9610 -0.3010  |
| H -2.4280 1.9000 2.1840   | C 3.0610 -0.1260 -3.1110  | H -0.1340 2.9620 -0.0040  |
| H 3.5320 -1.8620 -0.3130  | C 3.8820 -2.5120 -1.2320  | H -0.3920 2.1560 -1.5810  |
| H 2.9970 -3.8320 -1.6910  | C 1.8760 3.2570 1.7700    | H -0.5250 -1.5540 2.8200  |
| H 0.6840 -4.7390 -1.8100  | C 1.9800 4.2220 0.7870    | C -0.6270 -0.4770 2.9940  |
| H -1.1550 -3.7050 -0.5010 | C 2.3460 3.8820 -0.5480   | C -1.5450 0.2490 2.3200   |
| Zr -0.2400 0.1500 -0.5780 | C 2.6110 2.5770 -0.9140   | H 0.0030 -0.0210 3.7590   |
| C 1.2240 1.9150 -0.7960   | C -1.9600 -2.6430 0.6780  | H -2.2420 -0.2280 1.6270  |
| H 2.2610 2.0000 -0.4570   | C -1.3950 -3.5860 1.5130  | H -1.6690 1.3210 2.5070   |
| H 0.9320 2.7660 -1.4220   | C 0.0090 -3.8440 1.5030   | C -6.0020 1.1100 -0.1080  |
| H 0.5990 1.9970 0.1530    | C 0.8470 -3.1780 0.6340   | H -6.2410 0.2630 0.5630   |
| H 1.0600 -1.5690 -2.3840  | C -2.7250 -0.3600 -1.6550 | H -5.5200 1.8820 0.5220   |
| C 0.7360 -0.5440 -2.5800  | C -3.7130 0.0860 -0.5680  | C -7.2890 1.6670 -0.7190  |
| C 1.6710 0.4920 -2.3450   | C -5.0050 0.6400 -1.1700  | H -7.7920 0.9020 -1.3350  |
| H 0.0050 -0.4050 -3.3790  | H -2.5340 0.4930 -2.3280  | H -7.9950 1.9970 0.0600   |
| H 2.6230 0.2200 -1.8830   | H -3.2220 -1.1310 -2.2740 | H -7.0710 2.5320 -1.3700  |
| H 1.6970 1.3620 -3.0030   | H -3.2560 0.8640 0.0660   |                           |
| C 6.1840 1.4360 0.6930    | H -3.9670 -0.7550 0.1000  | <b>CAT-6-TS</b>           |
| H 6.8560 2.2450 1.0200    | H -5.4760 -0.1350 -1.8020 | C -0.0840 -0.4030 1.7800  |
| H 6.6980 0.4750 0.8690    | H -4.7590 1.4830 -1.8430  | C 1.1810 -0.7210 1.2110   |
| H 6.0320 1.5400 -0.3960   | H 4.0490 0.3660 -3.1080   | C 0.9680 -1.8710 0.3670   |
|                           | H 2.2930 0.6430 -3.2970   | C -0.4520 -2.1910 0.4040  |
| <b>CAT-6-REACTANT</b>     | H 3.0380 -0.8380 -3.9540  | C -1.1200 -1.2730 1.3020  |
| C -0.1700 -0.6690 -1.8860 | H 4.9270 -2.2320 -1.4500  | H -0.2410 0.4280 2.4690   |
| C -1.3950 -0.9120 -1.2160 | H 3.6020 -3.3440 -1.9010  | Si -2.9670 -0.8250 1.3850 |
| C -1.1220 -1.9210 -0.2220 | H 3.8470 -2.8770 -0.1920  | C -2.8590 0.4610 -0.0110  |
| C 0.2970 -2.2200 -0.2690  | H 1.6140 3.5250 2.7960    | C -2.8550 0.1300 -1.4100  |
| C 0.9080 -1.4290 -1.3180  | H 1.7890 5.2680 1.0330    | C -2.2600 1.1700 -2.1690  |
| H -0.0610 0.0500 -2.6970  | H 2.4260 4.6770 -1.2920   | C -1.9110 2.2230 -1.2650  |
| Si 2.7580 -1.0320 -1.4950 | H 2.9050 2.3300 -1.9340   | C -2.2550 1.7750 0.0730   |

|                           |                           |                           |
|---------------------------|---------------------------|---------------------------|
| H -3.2130 -0.8120 -1.8250 | C 1.2490 1.6130 -0.9400   | C 1.7850 4.3610 0.7730    |
| H -2.1450 1.1910 -3.2510  | H 2.3000 1.5250 -0.6460   | C 2.2000 4.0530 -0.5550   |
| C -3.3870 -0.0840 3.0580  | H 1.0780 2.4840 -1.5820   | C 2.6020 2.7800 -0.9090   |
| C -4.0970 -2.2360 0.8760  | H 0.6930 1.8290 0.0300    | C -1.4360 -2.8650 0.6610  |
| C -1.3340 3.5110 -1.4640  | H 0.4280 -1.8330 -2.3940  | C -0.7920 -3.7460 1.5050  |
| C -1.0720 4.2970 -0.3630  | C 0.2670 -0.7740 -2.6140  | C 0.6310 -3.8660 1.5140   |
| C -1.3750 3.8480 0.9610   | C 1.3710 0.0990 -2.4620   | C 1.4110 -3.1200 0.6560   |
| C -1.9530 2.6180 1.1890   | H -0.4690 -0.5410 -3.3870 | C -2.3840 -0.6640 -1.6990 |
| C 1.8420 -2.6830 -0.4130  | H 2.2890 -0.3130 -2.0370  | C -3.4400 -0.3460 -0.6320 |
| C 1.3180 -3.7400 -1.1290  | H 1.5030 0.9350 -3.1510   | C -4.7530 0.1240 -1.2610  |
| C -0.0790 -4.0300 -1.1210 | C 6.1350 0.3480 0.3480    | H -2.2600 0.2210 -2.3440  |
| C -0.9590 -3.2690 -0.3810 | H 6.4480 -0.6970 0.5300   | H -2.7860 -1.4610 -2.3520 |
| C 2.4590 -0.0360 1.6210   | H 5.9120 0.4230 -0.7330   | H -3.0710 0.4430 0.0450   |
| C 3.7110 -0.3130 0.7820   | C 7.2740 1.3030 0.7120    | H -3.6430 -1.2310 -0.0060 |
| C 4.8590 0.6310 1.1430    | H 7.5260 1.2210 1.7830    | H -5.1260 -0.6560 -1.9500 |
| H 2.2760 1.0540 1.6460    | H 8.1840 1.0840 0.1310    | H -4.5560 1.0180 -1.8830  |
| H 2.6750 -0.3160 2.6680   | H 6.9870 2.3510 0.5140    | H 4.2950 0.7040 -3.0740   |
| H 3.4850 -0.2130 -0.2950  |                           | H 2.5220 0.8150 -3.2740   |
| H 4.0380 -1.3540 0.9360   | <b>CAT-7-REACTANT</b>     | H 3.4060 -0.5940 -3.9200  |
| H 5.0700 0.5490 2.2250    | C 0.1870 -0.7360 -1.8910  | H 5.4090 -1.7690 -1.3660  |
| H 4.5390 1.6770 0.9700    | C -1.0180 -1.0930 -1.2360 | H 4.2150 -3.0150 -1.8360  |
| H -4.3100 0.5180 3.0030   | C -0.6610 -2.0660 -0.2320 | H 4.3750 -2.5170 -0.1260  |
| H -2.5750 0.5580 3.4380   | C 0.7820 -2.2240 -0.2580  | H 1.4700 3.6420 2.7830    |
| H -3.5460 -0.8910 3.7950  | C 1.3260 -1.3810 -1.3030  | H 1.4850 5.3830 1.0100    |
| H -5.1510 -1.9410 1.0160  | H 0.2340 -0.0160 -2.7070  | H 2.2080 4.8480 -1.3030   |
| H -3.9090 -3.1330 1.4910  | Si 3.1280 -0.8010 -1.4610 | H 2.9320 2.5590 -1.9240   |
| H -3.9630 -2.5080 -0.1840 | C 3.0010 0.3630 0.0360    | H -2.5240 -2.8080 0.6520  |
| H -1.1150 3.8650 -2.4730  | C 2.8490 -0.1260 1.3770   | H -1.3810 -4.3790 2.1720  |
| H -0.6390 5.2900 -0.4970  | C 2.3190 0.8850 2.2160    | H 1.1010 -4.5800 2.1930   |
| H -1.1610 4.5080 1.8040   | C 2.1880 2.0820 1.4320    | H 2.4940 -3.2490 0.6300   |
| H -2.2170 2.3020 2.1990   | C 2.6110 1.7640 0.0840    | Zr 0.5810 0.2070 0.4000   |
| H 2.9120 -2.4880 -0.4290  | H 3.0610 -1.1450 1.6950   | C -0.4750 1.9420 -0.5110  |
| H 1.9870 -4.3760 -1.7130  | H 2.1600 0.8120 3.2890    | H -1.5460 1.7480 -0.2920  |
| H -0.4490 -4.8770 -1.7020 | C 3.3570 0.1220 -3.0800   | H -0.1720 2.8950 -0.0490  |
| H -2.0210 -3.5100 -0.3520 | C 4.3940 -2.1560 -1.1670  | H -0.3840 2.0340 -1.6050  |
| Zr -0.4790 0.1280 -0.5970 | C 1.7690 3.3960 1.7620    | H -0.1400 -1.6510 2.8120  |

|                           |                           |                           |
|---------------------------|---------------------------|---------------------------|
| C -0.3390 -0.5880 2.9850  | C -2.1070 2.6770 1.1880   | H -0.7350 -0.5310 -3.3850 |
| C -1.3130 0.0530 2.3030   | C 1.4630 -2.7770 -0.4050  | H 2.0260 -0.4020 -2.0300  |
| H 0.2410 -0.0790 3.7560   | C 0.8980 -3.8080 -1.1290  | H 1.2840 0.8770 -3.1370   |
| H -1.9580 -0.4860 1.6050  | C -0.5110 -4.0350 -1.1330 | C 5.8750 0.0660 0.3930    |
| H -1.5350 1.1090 2.4890   | C -1.3620 -3.2390 -0.3960 | H 6.1440 -0.9930 0.5670   |
| C -5.8280 0.4510 -0.2250  | C 2.1790 -0.1650 1.6420   | H 5.6700 0.1590 -0.6910   |
| H -6.0290 -0.4470 0.3910  | C 3.4220 -0.4900 0.8070   | C 7.0640 0.9570 0.7620    |
| H -5.4460 1.2250 0.4690   | C 4.6080 0.4010 1.1800    | H 7.2620 0.8620 1.8450    |
| C -7.1360 0.9370 -0.8530  | H 2.0420 0.9310 1.6710    | H 6.7900 2.0150 0.5880    |
| H -7.5090 0.1640 -1.5500  | H 2.3780 -0.4590 2.6880   | C 8.3250 0.6080 -0.0310   |
| H -6.9290 1.8340 -1.4660  | H 3.2060 -0.3740 -0.2700  | H 9.1700 1.2590 0.2480    |
| C -8.2060 1.2570 0.1930   | H 3.7040 -1.5450 0.9560   | H 8.6260 -0.4380 0.1530   |
| H -9.1390 1.6070 -0.2790  | H 4.8080 0.3040 2.2630    | H 8.1510 0.7210 -1.1150   |
| H -8.4450 0.3630 0.7960   | H 4.3360 1.4600 1.0110    |                           |
| H -7.8580 2.0450 0.8840   | H -4.5690 0.6770 2.9820   | <b>CAT-8-REACTANT</b>     |
|                           | H -2.8360 0.6470 3.4270   | C 1.7820 0.8530 -1.4040   |
| <b>CAT-7-TS</b>           | H -3.8650 -0.7630 3.7750  | C 2.6050 -0.0860 -0.7280  |
| C -0.3780 -0.4220 1.7830  | H -5.5020 -1.7350 0.9860  | C 2.6210 0.3150 0.6560    |
| C 0.8760 -0.7940 1.2210   | H -4.3160 -2.9820 1.4650  | C 1.7880 1.5050 0.7840    |
| C 0.6190 -1.9300 0.3710   | H -4.3340 -2.3510 -0.2090 | C 1.2620 1.8530 -0.5110   |
| C -0.8140 -2.1880 0.3990  | H -1.1960 3.8980 -2.4660  | H 1.5610 0.7970 -2.4710   |
| C -1.4470 -1.2460 1.2960  | H -0.6690 5.2950 -0.4820  | Si -0.2600 2.9190 -0.8980 |
| H -0.5030 0.4120 2.4740   | H -1.2360 4.5290 1.8130   | C -1.4850 1.5040 -0.5850  |
| Si -3.2730 -0.7170 1.3680 | H -2.3890 2.3700 2.1960   | C -1.9180 1.0760 0.7130   |
| C -3.0990 0.5660 -0.0240  | H 2.5400 -2.6290 -0.4140  | C -2.4330 -0.2490 0.6750  |
| C -3.1010 0.2390 -1.4230  | H 1.5420 -4.4700 -1.7100  | C -2.3850 -0.6680 -0.7010 |
| C -2.4570 1.2540 -2.1760  | H -0.9140 -4.8620 -1.7200 | C -1.7770 0.3950 -1.4720  |
| C -2.0680 2.2880 -1.2670  | H -2.4340 -3.4330 -0.3760 | H -1.8280 1.6700 1.6250   |
| C -2.4390 1.8520 0.0680   | Zr -0.7330 0.1310 -0.5950 | C -0.2230 3.4980 -2.6840  |
| H -3.4980 -0.6860 -1.8430 | C 1.0550 1.5490 -0.9190   | C -0.5400 4.3080 0.3360   |
| H -2.3340 1.2720 -3.2570  | H 2.0970 1.4110 -0.6120   | C -2.8310 -1.8530 -1.3410 |
| C -3.6710 0.0380 3.0410   | H 0.9350 2.4300 -1.5590   | C -2.6380 -1.9840 -2.7010 |
| C -4.4610 -2.0760 0.8510  | H 0.4950 1.7900 0.0430    | C -2.0080 -0.9550 -3.4610 |
| C -1.4350 3.5510 -1.4580  | H 0.1150 -1.8560 -2.3940  | C -1.5750 0.2160 -2.8720  |
| C -1.1450 4.3210 -0.3540  | C -0.0100 -0.7920 -2.6110 | C 3.2980 -0.1840 1.8140   |
| C -1.4740 3.8810 0.9670   | C 1.1230 0.0420 -2.4530   | C 3.1300 0.4570 3.0230    |

|    |         |         |         |                 |         |         |         |    |         |         |         |
|----|---------|---------|---------|-----------------|---------|---------|---------|----|---------|---------|---------|
| C  | 2.2820  | 1.6010  | 3.1520  | H               | 0.1110  | -3.1880 | 1.6900  | C  | -3.2480 | -1.3200 | 1.3860  |
| C  | 1.6090  | 2.1140  | 2.0640  | C               | -3.1560 | -0.9750 | 1.7700  | C  | -3.8830 | -2.3880 | 0.4890  |
| C  | 3.3830  | -1.1610 | -1.4380 | C               | -4.6850 | -0.9130 | 1.5870  | C  | -4.3410 | -3.5980 | 1.3070  |
| C  | 3.9530  | -2.2990 | -0.5830 | H               | -2.9000 | -0.5330 | 2.7480  | H  | -2.5340 | -1.8090 | 2.0740  |
| C  | 4.4580  | -3.4480 | -1.4580 | H               | -2.8460 | -2.0360 | 1.7990  | H  | -4.0370 | -0.9010 | 2.0380  |
| H  | 2.7330  | -1.5890 | -2.2200 | H               | -4.9950 | 0.1460  | 1.5600  | H  | -3.1660 | -2.7090 | -0.2870 |
| H  | 4.2190  | -0.6780 | -1.9770 | H               | -4.9450 | -1.3410 | 0.6030  | H  | -4.7470 | -1.9550 | -0.0420 |
| H  | 3.1800  | -2.6730 | 0.1110  | C               | -5.4190 | -1.6580 | 2.7020  | H  | -5.0610 | -3.2920 | 2.0840  |
| H  | 4.7820  | -1.9180 | 0.0360  | H               | -5.1800 | -1.2250 | 3.6890  | H  | -3.4840 | -4.0740 | 1.8150  |
| H  | 5.2280  | -3.0910 | -2.1640 | H               | -6.5100 | -1.6060 | 2.5640  | H  | -4.8270 | -4.3540 | 0.6710  |
| H  | 3.6320  | -3.8770 | -2.0520 | H               | -5.1280 | -2.7230 | 2.7230  | H  | 1.1500  | 3.7420  | 3.1430  |
| H  | 4.9000  | -4.2530 | -0.8500 |                 |         |         |         | H  | -0.2420 | 2.6560  | 3.4340  |
| H  | -1.2350 | 3.7690  | -3.0310 | <b>CAT-8-TS</b> |         |         |         | H  | -0.5210 | 4.3270  | 2.8860  |
| H  | 0.1800  | 2.7240  | -3.3580 | C               | -1.7560 | 0.7780  | 1.4150  | H  | 1.3080  | 4.9680  | 0.1230  |
| H  | 0.4220  | 4.3890  | -2.7760 | C               | -2.5440 | -0.1730 | 0.7080  | H  | -0.4280 | 4.9600  | -0.2960 |
| H  | -1.3700 | 4.9490  | -0.0080 | C               | -2.6280 | 0.3010  | -0.6520 | H  | 0.7280  | 3.9670  | -1.2320 |
| H  | 0.3610  | 4.9390  | 0.4350  | C               | -1.8310 | 1.5160  | -0.7460 | H  | 3.2880  | -2.6280 | 0.6970  |
| H  | -0.8070 | 3.9240  | 1.3340  | C               | -1.2870 | 1.8280  | 0.5580  | H  | 2.8110  | -3.0130 | 3.1060  |
| H  | -3.3180 | -2.6410 | -0.7640 | H               | -1.5150 | 0.6910  | 2.4760  | H  | 1.6660  | -1.2830 | 4.4750  |
| H  | -2.9790 | -2.8860 | -3.2130 | Si              | 0.2160  | 2.9140  | 0.9830  | H  | 1.0050  | 0.8940  | 3.4990  |
| H  | -1.8830 | -1.0940 | -4.5370 | C               | 1.4860  | 1.5400  | 0.6580  | H  | -3.9470 | -1.0540 | -1.7590 |
| H  | -1.1260 | 1.0090  | -3.4680 | C               | 1.9670  | 1.1660  | -0.6470 | H  | -3.7280 | 0.1780  | -3.8790 |
| H  | 3.9580  | -1.0450 | 1.7390  | C               | 2.4840  | -0.1550 | -0.6480 | H  | -2.3030 | 2.2090  | -4.0550 |
| H  | 3.6600  | 0.0890  | 3.9040  | C               | 2.3710  | -0.6430 | 0.6970  | H  | -1.0980 | 3.0900  | -2.0720 |
| H  | 2.1830  | 2.0810  | 4.1280  | C               | 1.7430  | 0.3900  | 1.4990  | Zr | -0.0790 | -0.1900 | -0.1180 |
| H  | 0.9910  | 3.0070  | 2.1580  | H               | 1.9070  | 1.7950  | -1.5370 | C  | -0.3000 | -2.4130 | 0.4490  |
| Zr | 0.1120  | -0.2410 | 0.0880  | C               | 0.1470  | 3.4540  | 2.7800  | H  | -1.2270 | -2.9810 | 0.5770  |
| C  | 0.3270  | -2.1670 | -1.0350 | C               | 0.4750  | 4.3310  | -0.2220 | H  | 0.5820  | -3.0600 | 0.4980  |
| H  | 1.3060  | -2.6450 | -0.8830 | C               | 2.7720  | -1.8730 | 1.2940  | H  | -0.2350 | -1.7420 | 1.3670  |
| H  | -0.4720 | -2.8710 | -0.7510 | C               | 2.5050  | -2.0800 | 2.6290  | H  | -0.9650 | -0.4760 | -2.7710 |
| H  | 0.2080  | -1.9580 | -2.1150 | C               | 1.8480  | -1.0830 | 3.4170  | C  | -0.1460 | -1.0180 | -2.2900 |
| H  | 0.7400  | -0.4060 | 2.9220  | C               | 1.4690  | 0.1280  | 2.8780  | C  | -0.4550 | -2.2610 | -1.6840 |
| C  | 0.1270  | -1.2570 | 2.6020  | C               | -3.3160 | -0.1700 | -1.8090 | H  | 0.8460  | -0.9000 | -2.7310 |
| C  | 0.6940  | -2.3090 | 1.9770  | C               | -3.1890 | 0.5250  | -2.9950 | H  | -1.5030 | -2.5690 | -1.6560 |
| H  | -0.9260 | -1.2690 | 2.8850  | C               | -2.3740 | 1.6910  | -3.0960 | H  | 0.2730  | -3.0730 | -1.7190 |
| H  | 1.7630  | -2.3200 | 1.7510  | C               | -1.6950 | 2.1810  | -2.0010 | C  | 3.1840  | -0.8620 | -1.7670 |

|                           |                           |                           |
|---------------------------|---------------------------|---------------------------|
| C 4.7140 -0.8620 -1.5860  | C -5.0590 -2.3680 1.3090  | H 5.1540 -0.5740 -0.4900  |
| H 2.9360 -0.3800 -2.7270  | H -3.2950 -0.5040 1.9900  | H 4.7100 -1.7270 0.7790   |
| H 2.8340 -1.9090 -1.8320  | H -4.5650 0.4440 1.2260   | C 5.5110 -2.6530 -1.0150  |
| H 5.0640 0.1830 -1.5270   | H -3.4410 -2.0910 -0.0950 | H 6.5140 -2.6860 -0.5570  |
| H 4.9600 -1.3290 -0.6160  | H -4.9250 -1.2150 -0.5090 | H 5.0460 -3.6370 -0.8210  |
| C 5.4190 -1.5990 -2.7240  | H -5.8680 -1.7620 1.7570  | C -5.6450 -3.6090 0.6350  |
| H 5.1960 -1.1270 -3.6970  | H -4.3950 -2.6650 2.1410  | H -6.2050 -4.2300 1.3520  |
| H 6.5120 -1.5940 -2.5860  | H 1.2420 4.4170 2.3900    | H -6.3350 -3.3270 -0.1800 |
| H 5.0870 -2.6510 -2.7780  | H -0.3590 3.6560 2.6330   | H -4.8460 -4.2340 0.1980  |
|                           | H -0.2210 5.1440 1.6650   | C 5.6490 -2.4330 -2.5250  |
| <b>CAT-9-REACTANT</b>     | H 2.0660 4.8140 -0.7390   | H 4.6720 -2.4840 -3.0370  |
| C -1.8510 1.5330 0.8620   | H 0.4500 4.8880 -1.4970   | H 6.0910 -1.4430 -2.7370  |
| C -2.6780 0.5510 0.2570   | H 1.5810 3.5660 -1.9120   | H 6.2980 -3.1980 -2.9790  |
| C -2.4010 0.6060 -1.1570  | H 2.7100 -2.5200 2.0360   |                           |
| C -1.3920 1.6360 -1.3720  | H 1.9410 -2.1180 4.3640   | <b>CAT-9-TS</b>           |
| C -1.0450 2.2280 -0.1050  | H 0.9210 0.0500 5.0170    | C -1.8690 1.2630 1.1570   |
| H -1.8250 1.7130 1.9380   | H 0.6680 1.8930 3.3790    | C -2.6630 0.3210 0.4440   |
| Si 0.5290 3.1910 0.3350   | H -3.7220 -0.8280 -2.1590 | C -2.5470 0.6660 -0.9510  |
| C 1.5680 1.6250 0.5880    | H -2.9050 -0.2820 -4.4170 | C -1.6260 1.7890 -1.0540  |
| C 2.1440 0.8500 -0.4730   | H -1.1330 1.4310 -4.7720  | C -1.2040 2.1780 0.2740   |
| C 2.4450 -0.4720 -0.0430  | H -0.1610 2.6700 -2.8550  | H -1.7600 1.2590 2.2420   |
| C 2.1060 -0.5360 1.3550   | Zr -0.1340 -0.0560 0.0130 | Si 0.3430 3.1600 0.7860   |
| C 1.5420 0.7410 1.7370    | C -0.8110 -1.6140 1.4710  | C 1.4980 1.6530 0.7410    |
| H 2.2970 1.2110 -1.4920   | H -1.8200 -1.9980 1.2600  | C 2.0830 1.1140 -0.4600   |
| C 0.2770 4.1880 1.9060    | H -0.0980 -2.4550 1.4880  | C 2.4610 -0.2420 -0.2860  |
| C 1.2150 4.2050 -1.0910   | H -0.8120 -1.1710 2.4840  | C 2.1470 -0.5870 1.0710   |
| C 2.2580 -1.5670 2.3170   | H -0.3020 -0.8310 -2.8020 | C 1.5410 0.5700 1.7020    |
| C 1.8270 -1.3390 3.6080   | C 0.1340 -1.6270 -2.1870  | H 2.1870 1.6590 -1.3990   |
| C 1.2410 -0.0930 3.9830   | C -0.6590 -2.4350 -1.4540 | C 0.1180 3.8810 2.5050    |
| C 1.0880 0.9340 3.0740    | H 1.2090 -1.8010 -2.2520  | C 0.8800 4.4210 -0.4980   |
| C -2.9390 -0.0840 -2.2880 | H -1.7420 -2.2940 -1.4370 | C 2.3530 -1.7860 1.8130   |
| C -2.4800 0.2280 -3.5500  | H -0.2490 -3.2610 -0.8660 | C 1.9170 -1.8390 3.1190   |
| C -1.4640 1.2120 -3.7550  | C 3.2270 -1.5150 -0.7840  | C 1.2780 -0.7170 3.7340   |
| C -0.9130 1.8970 -2.6930  | C 4.6940 -1.5630 -0.3120  | C 1.0870 0.4670 3.0540    |
| C -3.7190 -0.2330 1.0080  | H 3.2040 -1.3000 -1.8650  | C -3.1460 0.1470 -2.1350  |
| C -4.2680 -1.4950 0.3320  | H 2.7760 -2.5130 -0.6370  | C -2.8200 0.7070 -3.3550  |

|            |         |         |                        |         |         |         |    |         |         |         |
|------------|---------|---------|------------------------|---------|---------|---------|----|---------|---------|---------|
| C -1.8850  | 1.7790  | -3.4590 | C                      | 3.2070  | -1.1110 | -1.2510 | C  | 0.8880  | 1.3590  | 3.9460  |
| C -1.2850  | 2.3110  | -2.3370 | C                      | 4.6980  | -1.2290 | -0.8870 | C  | 0.8000  | 2.0610  | 2.7610  |
| C -3.5520  | -0.6860 | 1.1260  | H                      | 3.1160  | -0.7010 | -2.2700 | C  | -2.7400 | -0.6730 | -2.3290 |
| C -4.1570  | -1.7950 | 0.2590  | H                      | 2.7650  | -2.1240 | -1.2720 | C  | -2.1790 | -0.7420 | -3.5870 |
| C -4.7770  | -2.9080 | 1.1060  | H                      | 5.1470  | -0.2200 | -0.8810 | C  | -1.1610 | 0.1710  | -4.0030 |
| H -2.9810  | -1.1480 | 1.9520  | H                      | 4.7920  | -1.6170 | 0.1430  | C  | -0.7100 | 1.1660  | -3.1610 |
| H -4.3770  | -0.1380 | 1.6170  | C                      | 5.4630  | -2.1340 | -1.8540 | C  | -3.7890 | 0.1540  | 0.7900  |
| H -3.3880  | -2.2300 | -0.4050 | H                      | 5.3510  | -1.7420 | -2.8820 | C  | -4.2740 | -1.2680 | 0.4850  |
| H -4.9320  | -1.3710 | -0.4020 | H                      | 4.9980  | -3.1380 | -1.8520 | C  | -5.1480 | -1.8210 | 1.6130  |
| H -5.5240  | -2.4650 | 1.7900  | C                      | 6.9460  | -2.2450 | -1.4950 | H  | -3.4420 | 0.2020  | 1.8360  |
| H -3.9920  | -3.3480 | 1.7500  | H                      | 7.0740  | -2.6560 | -0.4790 | H  | -4.6560 | 0.8380  | 0.7320  |
| H 1.0930   | 4.1180  | 2.9660  | H                      | 7.4820  | -2.9020 | -2.1990 | H  | -3.4120 | -1.9430 | 0.3350  |
| H -0.4220  | 3.1890  | 3.1730  | H                      | 7.4300  | -1.2530 | -1.5190 | H  | -4.8470 | -1.2690 | -0.4550 |
| H -0.4710  | 4.8130  | 2.4460  | C                      | -5.4280 | -3.9980 | 0.2540  | H  | -6.0080 | -1.1420 | 1.7660  |
| H 1.7310   | 5.0090  | -0.1120 | H                      | -5.8580 | -4.7960 | 0.8800  | H  | -4.5640 | -1.8050 | 2.5510  |
| H 0.0600   | 5.1210  | -0.7340 | H                      | -6.2390 | -3.5790 | -0.3670 | H  | 0.9750  | 5.1840  | 1.0610  |
| H 1.2040   | 3.9380  | -1.4350 | H                      | -4.6900 | -4.4610 | -0.4260 | H  | -0.6260 | 4.4670  | 1.4060  |
| H 2.8550   | -2.6370 | 1.3490  |                        |         |         |         | H  | -0.4370 | 5.5990  | 0.0460  |
| H 2.0720   | -2.7460 | 3.7070  | <b>CAT-10-REACTANT</b> |         |         |         | H  | 2.0570  | 4.6480  | -1.9660 |
| H 0.9570   | -0.7990 | 4.7740  | C                      | -1.9390 | 1.8600  | 0.2530  | H  | 0.5080  | 4.4330  | -2.8300 |
| H 0.6330   | 1.3270  | 3.5460  | C                      | -2.7000 | 0.7100  | -0.0850 | H  | 1.6850  | 3.0890  | -2.7400 |
| H -3.8650  | -0.6680 | -2.0820 | C                      | -2.3060 | 0.3450  | -1.4230 | H  | 2.5510  | -1.4820 | 2.9430  |
| H -3.2890  | 0.3240  | -4.2630 | C                      | -1.2960 | 1.2990  | -1.8650 | H  | 1.5780  | -0.4310 | 4.9740  |
| H -1.6550  | 2.1900  | -4.4440 | C                      | -1.0640 | 2.2590  | -0.8170 | H  | 0.4770  | 1.7920  | 4.8600  |
| H -0.5940  | 3.1510  | -2.4150 | H                      | -2.0040 | 2.3590  | 1.2210  | H  | 0.3420  | 3.0490  | 2.7290  |
| Zr -0.1360 | 0.0040  | -0.0660 | Si                     | 0.4550  | 3.3680  | -0.5710 | H  | -3.5220 | -1.3720 | -2.0410 |
| C -0.6430  | -2.1270 | 0.6600  | C                      | 1.4870  | 1.9920  | 0.2270  | H  | -2.5230 | -1.5060 | -4.2870 |
| H -1.6300  | -2.5960 | 0.7180  | C                      | 2.1620  | 0.9570  | -0.5010 | H  | -0.7480 | 0.0840  | -5.0100 |
| H 0.1580   | -2.8420 | 0.8760  | C                      | 2.4410  | -0.1620 | 0.3310  | H  | 0.0420  | 1.8810  | -3.4920 |
| H -0.6210  | -1.3790 | 1.5180  | C                      | 1.9830  | 0.1850  | 1.6520  | Zr | -0.1370 | 0.1520  | 0.0580  |
| H -0.7450  | -0.4640 | -2.7710 | C                      | 1.3720  | 1.4950  | 1.5840  | C  | -0.9130 | -0.9290 | 1.8590  |
| C -0.0400  | -1.0230 | -2.1500 | H                      | 2.3980  | 1.0000  | -1.5660 | H  | -1.9000 | -1.3870 | 1.6980  |
| C -0.5280  | -2.1730 | -1.4820 | C                      | 0.0570  | 4.7820  | 0.6000  | H  | -0.1970 | -1.7070 | 2.1710  |
| H 1.0020   | -1.0280 | -2.4740 | C                      | 1.2460  | 3.9310  | -2.1800 | H  | -0.9940 | -0.2100 | 2.6950  |
| H -1.5950  | -2.3960 | -1.5590 | C                      | 2.0650  | -0.5060 | 2.8880  | H  | -0.0500 | -1.4310 | -2.3780 |
| H 0.1240   | -3.0390 | -1.3540 | C                      | 1.5200  | 0.0820  | 4.0120  | C  | 0.3270  | -2.0000 | -1.5200 |

|                           |                           |                           |
|---------------------------|---------------------------|---------------------------|
| C -0.5310 -2.5880 -0.6610 | C 1.4210 1.8720 0.8500    | H -2.8030 0.4290 -4.6020  |
| H 1.4030 -2.1530 -1.4340  | C 2.1060 1.2460 -0.2510   | H -1.0490 2.1900 -4.6830  |
| H -1.6120 -2.4830 -0.7840 | C 2.4120 -0.1100 0.0320   | H -0.1940 3.2290 -2.5980  |
| H -0.1770 -3.1970 0.1750  | C 1.9450 -0.3670 1.3650   | Zr -0.1810 0.2360 -0.0440 |
| C 3.2980 -1.3480 0.0020   | C 1.3210 0.8450 1.8650    | C -0.8600 -1.8100 0.7770  |
| C 4.7240 -1.1870 0.5660   | H 2.3270 1.7320 -1.2030   | H -1.8750 -2.2190 0.7460  |
| H 3.3560 -1.4750 -1.0910  | C -0.0610 4.2320 2.3340   | H -0.1380 -2.5450 1.1450  |
| H 2.8560 -2.2720 0.4180   | C 1.0570 4.5980 -0.5820   | H -0.8900 -0.9960 1.5720  |
| H 5.1770 -0.2810 0.1250   | C 2.0230 -1.5270 2.1870   | H -0.5570 -0.4560 -2.7560 |
| H 4.6560 -1.0090 1.6530   | C 1.4520 -1.4910 3.4400   | C 0.0900 -0.9480 -2.0250  |
| C 5.6130 -2.4030 0.2900   | C 0.7970 -0.3150 3.9240   | C -0.4460 -2.0490 -1.3110 |
| H 6.5780 -2.2610 0.8070   | C 0.7240 0.8340 3.1640    | H 1.1570 -0.9670 -2.2540  |
| H 5.1510 -3.3050 0.7350   | C -2.9260 0.3780 -2.4660  | H -1.4880 -2.3220 -1.4860 |
| C -5.6610 -3.2410 1.3470  | C -2.4240 0.8430 -3.6650  | H 0.2140 -2.8730 -1.0310  |
| H -6.1760 -3.6070 2.2510  | C -1.4210 1.8560 -3.7130  | C 3.2200 -1.0550 -0.8020  |
| H -4.7970 -3.9140 1.1870  | C -0.9340 2.4290 -2.5570  | C 4.6680 -1.1870 -0.2950  |
| C 5.8820 -2.6540 -1.1980  | C -3.7460 -0.2520 0.7600  | H 3.2380 -0.7070 -1.8480  |
| H 4.9310 -2.8610 -1.7230  | C -4.2650 -1.3980 -0.1150 | H 2.7520 -2.0560 -0.8040  |
| H 6.2940 -1.7310 -1.6480  | C -5.0000 -2.4590 0.7030  | H 5.1380 -0.1880 -0.2920  |
| C -6.6150 -3.3300 0.1510  | H -3.3020 -0.6740 1.6800  | H 4.6570 -1.5300 0.7550   |
| H -6.1140 -3.0550 -0.7930 | H -4.6100 0.3460 1.1030   | C 5.4930 -2.1500 -1.1480  |
| H -7.0090 -4.3520 0.0310  | H -3.4290 -1.8730 -0.6600 | H 5.4880 -1.8030 -2.1990  |
| H -7.4730 -2.6480 0.2860  | H -4.9470 -0.9990 -0.8840 | H 5.0090 -3.1450 -1.1490  |
| C 6.8480 -3.8190 -1.4220  | H -5.8230 -1.9810 1.2660  | C 6.9380 -2.2860 -0.6650  |
| H 7.0340 -3.9900 -2.4950  | H -4.3110 -2.8760 1.4630  | H 6.9370 -2.6310 0.3860   |
| H 7.8180 -3.6210 -0.9350  | H 0.8640 4.4690 2.8880    | H 7.4130 -1.2880 -0.6640  |
| H 6.4430 -4.7520 -0.9930  | H -0.6900 3.5870 2.9700   | C -5.5590 -3.5950 -0.1560 |
|                           | H -0.6130 5.1740 2.1670   | H -6.2490 -3.1710 -0.9090 |
| <b>CAT-10-TS</b>          | H 1.8720 5.1860 -0.1250   | H -4.7300 -4.0610 -0.7220 |
| C -1.9910 1.6320 0.8910   | H 0.2910 5.3020 -0.9490   | C 7.7530 -3.2510 -1.5300  |
| C -2.7400 0.6830 0.1400   | H 1.4780 4.0610 -1.4490   | H 7.7850 -2.9060 -2.5780  |
| C -2.4430 0.9380 -1.2480  | H 2.5350 -2.4210 1.8250   | H 8.7910 -3.3370 -1.1690  |
| C -1.4600 2.0100 -1.3000  | H 1.5080 -2.3680 4.0880   | H 7.3050 -4.2600 -1.5220  |
| C -1.1830 2.4640 0.0460   | H 0.3650 -0.3260 4.9260   | C -6.2830 -4.6560 0.6750  |
| H -2.0080 1.6870 1.9800   | H 0.2560 1.7360 3.5580    | H -7.1310 -4.2110 1.2240  |
| Si 0.3310 3.4190 0.6870   | H -3.6920 -0.3940 -2.4560 | H -6.6770 -5.4660 0.0400  |

|                           |                            |                           |
|---------------------------|----------------------------|---------------------------|
| H -5.6020 -5.1060 1.4180  | H -0.6450 -4.8880 -0.6040  | C 5.8240 2.7000 0.2840    |
|                           | H -0.3600 -5.7690 0.9170   | H 4.8860 3.0020 0.7880    |
| <b>CAT-11-REACTANT</b>    | H 2.2650 -4.5020 2.5480    | H 6.2740 1.9070 0.9120    |
| C -1.9350 -2.1510 0.2100  | H 0.7880 -4.1220 3.4790    | C -6.5960 3.0480 -0.2990  |
| C -2.6850 -0.9610 0.3960  | H 1.9510 -2.8270 3.0640    | H -5.9860 2.9250 0.6150   |
| C -2.1790 -0.3490 1.5990  | H 2.3590 0.6970 -3.3590    | H -7.4450 2.3450 -0.2020  |
| C -1.1110 -1.1980 2.1140  | H 1.2960 -0.7060 -5.1140   | C 6.7650 3.9060 0.2350    |
| C -0.9580 -2.3390 1.2480  | H 0.2420 -2.8810 -4.5470   | H 7.7090 3.6060 -0.2540   |
| H -2.0800 -2.8220 -0.6370 | H 0.2500 -3.7430 -2.2210   | H 6.3170 4.6870 -0.4070   |
| Si 0.5560 -3.4690 1.0790  | H -3.3740 1.4450 1.9960    | C 7.0560 4.4790 1.6240    |
| C 1.5030 -2.2450 -0.0150  | H -2.1740 2.0070 4.0730    | H 7.7350 5.3450 1.5700    |
| C 2.1940 -1.0900 0.4790   | H -0.2990 0.5960 4.9050    | H 6.1240 4.8080 2.1170    |
| C 2.4100 -0.1360 -0.5530  | H 0.3870 -1.4530 3.6850    | H 7.5270 3.7180 2.2710    |
| C 1.8890 -0.7170 -1.7640  | Zr -0.1520 -0.4300 -0.0810 | C -7.1160 4.4860 -0.3730  |
| C 1.3100 -2.0000 -1.4320  | C -1.1130 0.2200 -1.9950   | H -7.7560 4.6240 -1.2610  |
| H 2.4850 -0.9390 1.5200   | H -2.0500 0.7710 -1.8170   | H -7.7090 4.7490 0.5190   |
| C 0.0910 -5.0620 0.1980   | H -0.4290 0.8470 -2.5870   | H -6.2790 5.2020 -0.4510  |
| C 1.4710 -3.7500 2.6960   | H -1.3540 -0.6720 -2.6020  |                           |
| C 1.8920 -0.2570 -3.1050  | H 0.0910 1.6550 1.9980     | <b>CAT-11-TS</b>          |
| C 1.2990 -1.0390 -4.0750  | C 0.3850 2.0220 1.0080     | C 2.0150 -1.9750 0.8080   |
| C 0.6940 -2.2890 -3.7480  | C -0.5520 2.3710 0.1030    | C 2.7820 -1.0230 0.0790   |
| C 0.6870 -2.7720 -2.4550  | H 1.4450 2.1770 0.8080     | C 2.4530 -1.2150 -1.3110  |
| C -2.5510 0.8190 2.3350   | H -1.6170 2.2750 0.3290    | C 1.4320 -2.2500 -1.3850  |
| C -1.8780 1.1270 3.4980   | H -0.2800 2.7740 -0.8760   | C 1.1650 -2.7470 -0.0530  |
| C -0.8030 0.3160 3.9780   | C 3.2590 1.0970 -0.4850    | H 2.0500 -2.0730 1.8940   |
| C -0.4100 -0.8170 3.2990  | C 4.6600 0.8610 -1.0860    | Si -0.3680 -3.6780 0.5780 |
| C -3.8560 -0.5800 -0.4680 | H 3.3670 1.4150 0.5640     | C -1.4060 -2.1050 0.8170  |
| C -4.3290 0.8760 -0.4030  | H 2.7780 1.9290 -1.0330    | C -2.0870 -1.4130 -0.2460 |
| C -5.2980 1.2090 -1.5400  | H 5.1660 0.0730 -0.5000    | C -2.3430 -0.0610 0.0970  |
| H -3.6010 -0.8310 -1.5120 | H 4.5460 0.4710 -2.1110    | C -1.8470 0.1260 1.4320   |
| H -4.7060 -1.2350 -0.2020 | C 5.5160 2.1320 -1.1040    | C -1.2570 -1.1250 1.8710  |
| H -3.4640 1.5630 -0.4600  | H 6.4670 1.9080 -1.6180    | H -2.3400 -1.8530 -1.2120 |
| H -4.8210 1.0650 0.5640   | H 5.0090 2.9060 -1.7120    | C 0.0250 -4.5620 2.1880   |
| H -6.1730 0.5350 -1.4740  | C -5.7720 2.6660 -1.5320   | C -1.1500 -4.7870 -0.7200 |
| H -4.8020 0.9850 -2.5020  | H -6.3800 2.8500 -2.4360   | C -1.8750 1.2530 2.3010   |
| H 0.9800 -5.5430 -0.2440  | H -4.8950 3.3380 -1.6080   | C -1.2850 1.1480 3.5420   |



|                           |                          |                           |
|---------------------------|--------------------------|---------------------------|
| C -0.6620 -0.0680 3.9660  | C 0.5300 1.8450 -1.2120  | C -1.1590 -0.7200 2.3530  |
| C -0.6390 -1.1860 3.1600  | H -1.0980 0.8250 -2.1800 | C -2.1510 -0.9090 1.3440  |
| C 2.9360 -0.6270 -2.5160  | H 1.5730 2.1160 -1.3890  | C -2.1860 0.3130 0.5320   |
| C 2.3960 -1.0260 -3.7220  | H -0.1170 2.6610 -0.8840 | C -1.1790 1.2210 1.0210   |
| C 1.3540 -1.9990 -3.7890  | C -3.1310 0.9450 -0.6820 | H 0.2680 0.9350 2.7090    |
| C 0.8670 -2.6000 -2.6470  | C -4.5660 1.1030 -0.1450 | Si -0.2350 2.5570 0.0300  |
| C 3.8290 -0.1460 0.7130   | H -3.1770 0.6450 -1.7430 | C 0.8380 1.2960 -0.9140   |
| C 4.3560 1.0270 -0.1230   | H -2.6290 1.9300 -0.6470 | C 0.4240 0.6150 -2.1040   |
| C 5.1130 2.0430 0.7320    | H -5.0720 0.1220 -0.1840 | C 1.1580 -0.5920 -2.2760  |
| H 3.4220 0.2440 1.6630    | H -4.5270 1.3920 0.9200  | C 2.1500 -0.6460 -1.2380  |
| H 4.6850 -0.7820 1.0040   | C -5.3680 2.1370 -0.9350 | C 1.9140 0.4850 -0.3610   |
| H 3.5220 1.5330 -0.6420   | H -5.3870 1.8470 -2.0030 | H -0.3890 0.9430 -2.7520  |
| H 5.0250 0.6490 -0.9140   | H -4.8510 3.1140 -0.8900 | H 1.0660 -1.2850 -3.1110  |
| H 5.9260 1.5280 1.2740    | C -6.8010 2.2950 -0.4260 | C 0.7370 3.6530 1.2010    |
| H 4.4320 2.4430 1.5080    | H -6.7810 2.5810 0.6430  | C -1.3240 3.5140 -1.1650  |
| H -0.8950 -4.7700 2.7610  | H -7.3160 1.3160 -0.4740 | C 3.2030 -1.5570 -0.9680  |
| H 0.7050 -3.9730 2.8240   | C 5.6920 3.2000 -0.0820  | C 3.9650 -1.3670 0.1660   |
| H 0.5210 -5.5250 1.9740   | H 6.3770 2.7990 -0.8520  | C 3.7060 -0.2890 1.0640   |
| H -1.9730 -5.3690 -0.2690 | H 4.8750 3.7090 -0.6300  | C 2.7020 0.6260 0.8210    |
| H -0.4100 -5.4980 -1.1260 | C -7.6050 3.3310 -1.2150 | C -2.6860 -2.1350 0.8360  |
| H -1.5710 -4.2080 -1.5590 | H -7.6160 3.0420 -2.2830 | C -3.0970 -2.1870 -0.4840 |
| H -2.3630 2.1770 1.9840   | H -7.0880 4.3070 -1.1620 | C -3.0890 -1.0080 -1.3040 |
| H -1.3020 1.9990 4.2260   | C 6.4380 4.2220 0.7780   | C -2.7000 0.2290 -0.8020  |
| H -0.2140 -0.1120 4.9610  | H 7.2500 3.7080 1.3240   | H 1.5370 4.1860 0.6590    |
| H -0.1940 -2.1180 3.5090  | H 5.7490 4.6180 1.5480   | H 1.2010 3.0810 2.0220    |
| H 3.7300 0.1160 -2.4900   | C -9.0400 3.4730 -0.7010 | H 0.0670 4.4050 1.6530    |
| H 2.7740 -0.5910 -4.6490  | H -9.0480 3.7840 0.3580  | H -0.7610 4.3670 -1.5820  |
| H 0.9520 -2.2800 -4.7640  | H -9.6030 4.2230 -1.2800 | H -2.2160 3.9130 -0.6510  |
| H 0.0970 -3.3690 -2.7040  | H -9.5790 2.5120 -0.7720 | H -1.6610 2.8960 -2.0140  |
| Zr 0.2360 -0.4850 -0.0360 | C 7.0140 5.3750 -0.0470  | H 3.4000 -2.3880 -1.6470  |
| C 0.9920 1.5030 0.8560    | H 7.5460 6.1010 0.5900   | H 4.7860 -2.0520 0.3880   |
| H 2.0230 1.8680 0.8210    | H 7.7260 5.0000 -0.8020  | H 4.3320 -0.1790 1.9520   |
| H 0.3100 2.2560 1.2660    | H 6.2120 5.9150 -0.5810  | H 2.5390 1.4700 1.4910    |
| H 0.9970 0.6610 1.6230    |                          | H -2.6630 -3.0370 1.4510  |
| H 0.6030 0.3110 -2.7220   | <b>CAT-1</b>             | H -3.4330 -3.1300 -0.9170 |
| C -0.0290 0.7830 -1.9660  | C -0.5730 0.5450 2.1370  | H -3.4150 -1.0870 -2.3430 |

|                            |                            |                           |
|----------------------------|----------------------------|---------------------------|
| H -2.7090 1.1120 -1.4400   | H -2.4190 -1.3540 3.3030   | C -1.8810 1.3690 0.0560   |
| Zr -0.2270 -0.7690 -0.1350 | H -3.6930 -2.5300 0.7520   | H -2.6590 -1.3330 -1.7660 |
| C 0.7570 -2.5880 0.7190    | H -4.4910 -1.2980 1.7770   | H -1.9590 0.7790 -3.2700  |
| H 0.1000 -3.1510 1.4020    | H 3.4100 2.0760 2.3840     | C -2.6190 -0.6220 3.1070  |
| H 1.0350 -3.2450 -0.1290   | H 2.0840 1.1200 3.1040     | C -3.0530 -2.8840 0.9750  |
| H 1.6890 -2.3300 1.2510    | H 2.0560 2.8970 3.2150     | C -1.3830 3.2120 -1.5410  |
| H -0.8610 -1.4510 3.1010   | H 2.4700 4.2830 0.2240     | C -1.1570 4.0380 -0.4600  |
|                            | H 0.7870 4.5870 0.7370     | C -1.2580 3.5540 0.8790   |
| <b>CAT-2</b>               | H 1.1290 3.9010 -0.8790    | C -1.6100 2.2480 1.1480   |
| C -0.6340 0.2880 1.9160    | H 2.2280 -3.2250 -2.3110   | C 2.5720 -1.5400 -1.0900  |
| C -1.8400 -0.3530 1.5400   | H 2.7900 -4.4010 -0.1980   | C 1.9870 -2.1460 -2.1880  |
| C -2.3680 0.4050 0.4390    | H 2.8810 -3.1810 1.9630    | C 0.6840 -2.7400 -2.0990  |
| C -1.4840 1.5630 0.2310    | H 2.4930 -0.7360 2.0710    | C -0.0180 -2.7630 -0.9010 |
| C -0.3820 1.4770 1.1520    | H -3.9350 -0.8370 -0.4650  | C 2.9940 0.5470 1.5170    |
| H 0.0330 -0.1070 2.6820    | H -3.7530 0.2280 -2.6880   | C 4.3400 0.3720 0.8070    |
| Si 1.3850 2.1740 0.9390    | H -2.1660 2.1140 -3.0820   | C 5.4180 1.2440 1.4550    |
| C 1.8970 0.8600 -0.3410    | H -0.7900 3.0350 -1.2310   | H 2.6450 1.5870 1.3830    |
| C 1.6300 0.9470 -1.7450    | Zr -0.2810 -0.2250 -0.6490 | H 3.1570 0.4240 2.6030    |
| C 1.6330 -0.3450 -2.3410   | C -0.7350 -2.4120 -0.5150  | H 4.2440 0.6500 -0.2570   |
| C 2.0200 -1.2870 -1.3280   | H -1.7770 -2.6110 -0.2190  | H 4.6410 -0.6900 0.8410   |
| C 2.1240 -0.5560 -0.0800   | H -0.5470 -2.8770 -1.5010  | H 5.5600 0.9670 2.5140    |
| H 1.3950 1.8710 -2.2730    | H -0.0590 -2.8990 0.2110   | H 5.1310 2.3090 1.4200    |
| H 1.4890 -0.5650 -3.3990   | H -4.0780 -2.8970 2.4430   | H 6.3850 1.1330 0.9390    |
| C 2.3200 2.0480 2.5600     |                            | H -3.6380 -0.1990 3.0890  |
| C 1.4390 3.8920 0.1800     | <b>CAT-3</b>               | H -1.9260 0.1650 3.4470   |
| C 2.2750 -2.6820 -1.3660   | C 0.6150 -0.3950 1.7730    | H -2.5960 -1.4340 3.8540  |
| C 2.5820 -3.3300 -0.1880   | C 1.8780 -0.3870 1.1330    | H -4.1200 -2.7930 1.2440  |
| C 2.6360 -2.6280 1.0540    | C 1.8160 -1.4050 0.1200    | H -2.6350 -3.7400 1.5320  |
| C 2.4100 -1.2690 1.1240    | C 0.5090 -2.0720 0.2360    | H -3.0050 -3.1130 -0.1020 |
| C -3.2540 -0.0020 -0.6120  | C -0.2520 -1.4210 1.2680   | H -1.2990 3.5850 -2.5630  |
| C -3.1410 0.5880 -1.8590   | H 0.3380 0.3240 2.5440     | H -0.8980 5.0850 -0.6250  |
| C -2.2330 1.6770 -2.0840   | Si -2.1530 -1.2950 1.4180  | H -1.0710 4.2430 1.7050   |
| C -1.4670 2.2010 -1.0510   | C -2.3160 -0.0210 0.0130   | H -1.7260 1.8990 2.1740   |
| C -2.3690 -1.5860 2.2250   | C -2.3870 -0.3520 -1.3780  | H 3.5530 -1.0800 -1.1790  |
| C -3.7360 -2.1000 1.7660   | C -1.9710 0.7480 -2.1810   | H 2.5220 -2.1820 -3.1380  |
| H -1.6170 -2.3890 2.1240   | C -1.7290 1.8570 -1.3010   | H 0.2510 -3.2050 -2.9870  |

|                           |                           |                           |
|---------------------------|---------------------------|---------------------------|
| H -1.0010 -3.2290 -0.8440 | H 4.0620 -1.6600 0.8040   | C 0.0960 -2.1260 0.2200   |
| Zr 0.0100 -0.0320 -0.7680 | H 4.9910 -0.1900 0.4370   | C -0.5710 -1.4090 1.2750  |
| C 1.3460 1.7390 -1.0700   | H 6.1150 -1.3880 -1.4810  | H 0.2100 0.2810 2.5210    |
| H 2.4130 1.4820 -0.9760   | H 5.1540 -2.8490 -1.1350  | Si -2.4460 -1.1150 1.4910 |
| H 1.1660 2.1660 -2.0740   | H 6.3620 -2.2760 0.0470   | C -2.5460 0.1610 0.0820   |
| H 1.1040 2.5230 -0.3300   | H -2.1300 2.2780 -3.6990  | C -2.6960 -0.1700 -1.3030 |
|                           | H -0.4860 1.5800 -3.7540  | C -2.2170 0.8850 -2.1290  |
|                           | H -0.6970 3.3460 -3.6510  | C -1.8500 1.9740 -1.2690  |
| <b>CAT-4</b>              | H -2.7880 4.1070 -1.1510  | C -1.9930 1.5090 0.0980   |
| C 1.4680 0.9070 -1.4460   | H -1.1630 4.7020 -0.7140  | H -3.0650 -1.1270 -1.6720 |
| C 2.4460 0.3570 -0.5820   | H -2.0910 3.6870 0.4290   | H -2.2420 0.9090 -3.2180  |
| C 2.2260 0.9610 0.7030    | H -2.3140 -3.6360 0.4310  | C -2.7880 -0.3960 3.1900  |
| C 1.1400 1.9430 0.5550    | H -1.5570 -4.4870 -1.7790 | C -3.5010 -2.6180 1.0950  |
| C 0.6540 1.8960 -0.7990   | H -0.8470 -2.9240 -3.5740 | C -1.3990 3.2930 -1.5330  |
| H 1.3430 0.5870 -2.4800   | H -0.9430 -0.4700 -3.2510 | C -1.0640 4.1030 -0.4690  |
| Si -1.1000 2.3130 -1.4330 | H 3.4010 -0.2070 2.1400   | C -1.1540 3.6370 0.8770   |
| C -1.8920 0.7350 -0.7220  | H 1.9920 0.4150 4.0750    | C -1.6050 2.3670 1.1700   |
| C -2.3480 0.5940 0.6310   | H 0.0600 1.9710 3.8060    | C 2.1470 -1.7730 -1.1810  |
| C -2.3850 -0.7740 1.0270  | H -0.4430 3.0200 1.6140   | C 1.4710 -2.3230 -2.2560  |
| C -2.0480 -1.5470 -0.1390 | Zr 0.0340 -0.1060 0.5200  | C 0.1260 -2.8050 -2.1180  |
| C -1.6880 -0.6260 -1.1980 | C 0.9150 -2.1610 0.4380   | C -0.5300 -2.7700 -0.8950 |
| H -2.5730 1.4270 1.2980   | H 1.9890 -2.1700 0.6860   | C 2.8390 0.2730 1.4010    |
| C -1.1020 2.3790 -3.3080  | H 0.3770 -2.8140 1.1520   | C 4.1370 -0.0120 0.6410   |
| C -1.8490 3.8410 -0.6350  | H 0.7790 -2.5970 -0.5680  | C 5.3180 0.7600 1.2330    |
| C -2.0110 -2.9480 -0.3600 | C -2.8890 -1.3320 2.3280  | H 2.5720 1.3380 1.2780    |
| C -1.5860 -3.4130 -1.5860 | C -4.3670 -1.7490 2.2220  | H 3.0320 0.1360 2.4800    |
| C -1.1790 -2.5140 -2.6180 | H -2.7710 -0.5790 3.1260  | H 4.0280 0.2740 -0.4210   |
| C -1.2190 -1.1470 -2.4420 | H -2.2830 -2.2080 2.6150  | H 4.3550 -1.0950 0.6640   |
| C 2.5780 0.4920 2.0110    | H -4.7210 -2.1690 3.1770  | H 5.4400 0.4720 2.2930    |
| C 1.7800 0.8320 3.0890    | H -4.9970 -0.8830 1.9650  | H 5.0800 1.8400 1.2280    |
| C 0.6730 1.7310 2.9350    | H -4.5000 -2.5110 1.4360  | H -3.7660 0.1160 3.2060   |
| C 0.3920 2.3270 1.7130    |                           | H -2.0170 0.3280 3.4990   |
| C 3.4640 -0.6580 -1.0280  |                           | H -2.8110 -1.2030 3.9420  |
| C 4.5300 -1.0860 -0.0150  | <b>CAT-5</b>              | H -4.5480 -2.4240 1.3860  |
| C 5.6030 -1.9490 -0.6810  | C 0.3990 -0.4610 1.7450   | H -3.1510 -3.5030 1.6540  |
| H 2.9290 -1.5540 -1.3920  | C 1.6350 -0.5640 1.0620   | H -3.5010 -2.8650 0.0200  |
| H 3.9750 -0.2350 -1.9120  | C 1.4510 -1.5750 0.0570   |                           |

|                            |                            |                           |
|----------------------------|----------------------------|---------------------------|
| H -1.3210 3.6520 -2.5610   | C -1.0570 4.1300 -0.5550   | H 6.5320 -1.0850 0.1330   |
| H -0.7230 5.1240 -0.6530   | C -1.1150 3.7050 0.8060    | H 6.2170 0.2920 -0.9370   |
| H -0.8790 4.3130 1.6890    | C -1.6410 2.4780 1.1550    | C 7.6470 0.7060 0.6440    |
| H -1.7100 2.0360 2.2030    | C 1.6850 -1.9760 -1.2600   | H 7.8460 0.4180 1.6910    |
| H 3.1610 -1.3990 -1.3060   | C 0.9180 -2.4920 -2.2900   | H 8.5330 0.4430 0.0450    |
| H 1.9660 -2.4020 -3.2250   | C -0.4510 -2.8690 -2.0790  | H 7.5290 1.8040 0.6150    |
| H -0.3760 -3.2300 -2.9890  | C -1.0420 -2.7660 -0.8260  |                           |
| H -1.5460 -3.1510 -0.8000  | C 2.6490 0.0590 1.2430     | <b>CAT-7</b>              |
| Zr -0.2590 -0.0540 -0.7790 | C 3.8810 -0.3320 0.4240    | C -0.1350 -0.5000 1.7220  |
| C 1.2120 1.5920 -1.1450    | C 5.1440 0.3610 0.9380     | C 1.0620 -0.7210 0.9990   |
| H 2.2560 1.2490 -1.0720    | H 2.4550 1.1390 1.1170     | C 0.7550 -1.7260 0.0180   |
| H 1.0400 2.0100 -2.1550    | H 2.8860 -0.0800 2.3130    | C -0.6360 -2.1550 0.2390  |
| H 1.0550 2.4110 -0.4200    | H 3.7380 -0.0570 -0.6360   | C -1.1990 -1.3670 1.3040  |
| C 6.6180 0.5080 0.4680     | H 4.0230 -1.4270 0.4580    | H -0.2320 0.2690 2.4880   |
| H 6.8800 -0.5650 0.4830    | H 5.3070 0.0830 1.9960     | Si -3.0320 -0.9060 1.5830 |
| H 6.5220 0.8170 -0.5870    | H 4.9890 1.4560 0.9250     | C -3.0770 0.3470 0.1510   |
| H 7.4580 1.0670 0.9100     | H -3.8480 0.4490 3.3460    | C -3.3040 -0.0000 -1.2200 |
|                            | H -2.0740 0.5270 3.5500    | C -2.7700 0.9940 -2.0870  |
| <b>CAT-6</b>               | H -2.9640 -0.9230 4.0760   | C -2.2830 2.0670 -1.2660  |
| C 0.1800 -0.4820 1.7120    | H -4.9110 -2.0700 1.6340   | C -2.4140 1.6440 0.1150   |
| C 1.3720 -0.6910 0.9770    | H -3.5900 -3.2450 1.8820   | H -3.7630 -0.9300 -1.5530 |
| C 1.0660 -1.7050 0.0050    | H -3.9620 -2.6370 0.2420   | H -2.8340 0.9980 -3.1750  |
| C -0.3170 -2.1510 0.2440   | H -1.4440 3.6470 -2.6200   | C -3.2410 -0.1230 3.2760  |
| C -0.8780 -1.3650 1.3110   | H -0.6520 5.1190 -0.7820   | C -4.2300 -2.3180 1.2650  |
| H 0.0810 0.2900 2.4750     | H -0.7530 4.3770 1.5860    | C -1.7350 3.3370 -1.5790  |
| Si -2.7140 -0.9270 1.6080  | H -1.7180 2.1800 2.2010    | C -1.2940 4.1390 -0.5470  |
| C -2.7890 0.3200 0.1720    | H 2.7150 -1.6810 -1.4420   | C -1.3720 3.7100 0.8120   |
| C -3.0260 -0.0330 -1.1950  | H 1.3570 -2.6240 -3.2800   | C -1.9150 2.4880 1.1520   |
| C -2.5140 0.9650 -2.0710   | H -1.0260 -3.2690 -2.9160  | C 1.3840 -1.9970 -1.2420  |
| C -2.0300 2.0450 -1.2590   | H -2.0780 -3.0650 -0.6760  | C 0.6220 -2.4980 -2.2830  |
| C -2.1410 1.6250 0.1250    | Zr -0.5660 -0.0800 -0.7880 | C -0.7530 -2.8600 -2.0880 |
| H -3.4780 -0.9690 -1.5210  | C 1.0000 1.4500 -1.2510    | C -1.3570 -2.7560 -0.8420 |
| H -2.5880 0.9640 -3.1590   | H 2.0200 1.0350 -1.2150    | C 2.3460 0.0120 1.2820    |
| C -2.9150 -0.1400 3.3000   | H 0.8160 1.8630 -2.2600    | C 3.5820 -0.3870 0.4710   |
| C -3.8960 -2.3550 1.3060   | H 0.9330 2.2890 -0.5350    | C 4.8470 0.2900 1.0010    |
| C -1.4990 3.3210 -1.5800   | C 6.3890 0.0110 0.1200     | H 2.1660 1.0950 1.1620    |

|                            |                           |                            |
|----------------------------|---------------------------|----------------------------|
| H 2.5710 -0.1370 2.3540    | <b>CAT-8</b>              | H -0.7880 4.5530 2.2150    |
| H 3.4500 -0.1030 -0.5880   | C -2.0390 1.0800 0.8590   | H 1.6110 4.8470 -0.0960    |
| H 3.7110 -1.4840 0.5000    | C -2.7250 0.0620 0.1510   | H 0.0440 4.8490 -0.9510    |
| H 4.9980 0.0020 2.0580     | C -2.3540 0.2190 -1.2290  | H 1.3520 3.7390 -1.4600    |
| H 4.7030 1.3870 0.9940     | C -1.4910 1.4070 -1.3270  | H 2.7100 -2.8720 1.3360    |
| H -4.1660 0.4790 3.3140    | C -1.2830 1.9400 -0.0060  | H 1.6770 -3.0500 3.5910    |
| H -2.3940 0.5320 3.5380    | H -2.0710 1.1720 1.9440   | H 0.3870 -1.1600 4.5570    |
| H -3.3090 -0.9080 4.0480   | Si 0.2210 2.9290 0.6360   | H 0.1530 0.9860 3.3450     |
| H -5.2450 -2.0190 1.5780   | C 1.3780 1.4200 0.6870    | H -3.0230 -1.5990 -2.2580  |
| H -3.9440 -3.2120 1.8450   | C 2.1110 0.9230 -0.4430   | H -1.3760 -1.3880 -4.0900  |
| H -4.2850 -2.5990 0.2000   | C 2.4410 -0.4530 -0.2840  | H 0.1990 0.5460 -4.1810    |
| H -1.6650 3.6660 -2.6170   | C 2.0060 -0.8290 1.0350   | H 0.0820 2.3710 -2.5020    |
| H -0.8760 5.1230 -0.7670   | C 1.3030 0.2990 1.6130    | Zr -0.1020 -0.2030 -0.3780 |
| H -1.0100 4.3760 1.5980    | H 2.3290 1.5020 -1.3410   | C -0.6370 -2.2540 0.3480   |
| H -2.0060 2.1880 2.1960    | C -0.1630 3.6490 2.3250   | H -1.6240 -2.5870 -0.0100  |
| H 2.4200 -1.7130 -1.4120   | C 0.8620 4.2030 -0.5880   | H 0.1320 -2.9680 -0.0060   |
| H 1.0700 -2.6290 -3.2700   | C 2.1510 -2.0380 1.7630   | H -0.6280 -2.2880 1.4520   |
| H -1.3240 -3.2480 -2.9340  | C 1.5710 -2.1310 3.0100   | C 3.2680 -1.3040 -1.2020   |
| H -2.3980 -3.0440 -0.7040  | C 0.8310 -1.0450 3.5660   | C 4.7480 -1.3430 -0.7710   |
| Zr -0.8480 -0.0770 -0.7860 | C 0.6870 0.1510 2.8920    | H 3.2020 -0.9220 -2.2350   |
| C 0.7400 1.4380 -1.2190    | C -2.3620 -0.7370 -2.2980 | H 2.8750 -2.3370 -1.2120   |
| H 1.7550 1.0120 -1.1710    | C -1.4310 -0.6220 -3.3140 | H 5.1420 -0.3110 -0.7650   |
| H 0.5740 1.8600 -2.2280    | C -0.5310 0.4940 -3.3710  | H 4.8060 -1.7070 0.2690    |
| H 0.6710 2.2720 -0.4970    | C -0.5950 1.5210 -2.4380  | C 5.5850 -2.2300 -1.6930   |
| C 6.0940 -0.0660 0.1900    | C -3.6340 -0.9360 0.8140  | H 5.5470 -1.8630 -2.7340   |
| H 6.2310 -1.1640 0.1930    | C -4.3890 -1.9170 -0.0880 | H 6.6400 -2.2470 -1.3770   |
| H 5.9390 0.2250 -0.8670    | C -5.4160 -2.7190 0.7140  | H 5.2100 -3.2680 -1.6880   |
| C 7.3630 0.6050 0.7180     | H -3.0470 -1.5050 1.5580  |                            |
| H 7.5120 0.3140 1.7740     | H -4.3760 -0.3600 1.3970  | <b>CAT-9</b>               |
| H 7.2200 1.7020 0.7150     | H -3.6770 -2.6140 -0.5630 | C -1.9740 1.6150 0.3070    |
| C 8.6030 0.2390 -0.1010    | H -4.8910 -1.3620 -0.8990 | C -2.6890 0.4890 -0.1690   |
| H 9.5070 0.7300 0.2930     | H -6.1620 -2.0480 1.1740  | C -2.1590 0.2040 -1.4740   |
| H 8.7740 -0.8510 -0.0880   | H -4.9240 -3.2820 1.5250  | C -1.1660 1.2430 -1.7890   |
| H 8.4810 0.5460 -1.1550    | H -5.9510 -3.4380 0.0740  | C -1.0420 2.1250 -0.6590   |
|                            | H 0.7670 3.9350 2.8460    | H -2.1100 2.0230 1.3090    |
|                            | H -0.7110 2.9390 2.9660   | Si 0.4810 3.1510 -0.1360   |

|                           |                            |                           |
|---------------------------|----------------------------|---------------------------|
| C 1.4650 1.6450 0.4820    | H -1.0720 -2.2380 -3.6140  | C 2.4320 -0.1160 0.3900   |
| C 2.2460 0.7830 -0.3590   | H 0.7040 -0.5380 -4.0410   | C 1.8110 0.2030 1.6470    |
| C 2.4140 -0.5030 0.2280   | H 0.6160 1.7010 -2.9720    | C 1.1150 1.4640 1.4950    |
| C 1.8170 -0.4380 1.5360   | Zr -0.0650 -0.1140 -0.2480 | H 2.5790 1.0600 -1.4920   |
| C 1.1850 0.8580 1.6740    | C -0.8970 -1.7920 0.9780   | C -0.2120 4.7150 0.2980   |
| H 2.6080 1.0500 -1.3520   | H -1.8730 -2.1420 0.6060   | C 1.1990 3.8090 -2.3510   |
| C 0.0040 4.3500 1.2270    | H -0.1850 -2.6390 0.9710   | C 1.7830 -0.4900 2.8840   |
| C 1.3710 3.9750 -1.5730   | H -1.0100 -1.4690 2.0290   | C 1.0450 0.0380 3.9220    |
| C 1.7620 -1.3830 2.5930   | C 3.2350 -1.6400 -0.3050   | C 0.3120 1.2530 3.7640    |
| C 1.0570 -1.0580 3.7330   | C 4.6690 -1.6170 0.2620    | C 0.3320 1.9610 2.5800    |
| C 0.3860 0.1960 3.8570    | H 3.2730 -1.5890 -1.4050   | C -2.0830 -1.3740 -1.8990 |
| C 0.4350 1.1430 2.8550    | H 2.7650 -2.6030 -0.0390   | C -1.0270 -1.7630 -2.7030 |
| C -2.1610 -1.0200 -2.2210 | H 5.1470 -0.6620 -0.0210   | C -0.0610 -0.8100 -3.1680 |
| C -1.1230 -1.2780 -3.0990 | H 4.6110 -1.6280 1.3640    | C -0.1770 0.5410 -2.8670  |
| C -0.1060 -0.2970 -3.3500 | C 5.5240 -2.7920 -0.2280   | C -3.7560 -0.0380 0.6990  |
| C -0.1540 0.9600 -2.7610  | H 6.4930 -2.7620 0.2990    | C -4.4450 -1.3370 0.2760  |
| C -3.7670 -0.2000 0.6240  | H 5.0380 -3.7410 0.0640    | C -5.6350 -1.6630 1.1830  |
| C -4.5080 -1.3610 -0.0450 | C -6.4210 -3.0220 0.1680   | H -3.3110 -0.1700 1.7010  |
| C -5.6900 -1.8370 0.8030  | H -7.2680 -3.3500 0.7910   | H -4.5290 0.7430 0.8140   |
| H -3.3320 -0.5510 1.5760  | H -6.8140 -2.7530 -0.8280  | H -3.7320 -2.1800 0.3200  |
| H -4.5090 0.5710 0.8990   | H -5.7400 -3.8820 0.0420   | H -4.7830 -1.2520 -0.7710 |
| H -3.8230 -2.2130 -0.2010 | C 5.7680 -2.7780 -1.7410   | H -6.3760 -0.8450 1.1090  |
| H -4.8710 -1.0500 -1.0420 | H 4.8280 -2.8980 -2.3070   | H -5.2880 -1.6800 2.2320  |
| H -6.3900 -0.9950 0.9490  | H 6.2330 -1.8270 -2.0530   | H 0.6600 5.2060 0.7630    |
| H -5.3210 -2.1150 1.8070  | H 6.4400 -3.5980 -2.0410   | H -0.8990 4.4030 1.1020   |
| H 0.8970 4.6790 1.7870    |                            | H -0.7390 5.4630 -0.3200  |
| H -0.7050 3.9010 1.9420   | <b>CAT-10</b>              | H 1.9300 4.6040 -2.1220   |
| H -0.4780 5.2430 0.7920   | C -2.0510 1.7550 -0.0070   | H 0.4750 4.2100 -3.0800   |
| H 2.1420 4.6630 -1.1850   | C -2.7050 0.5170 -0.2240   | H 1.7510 2.9830 -2.8280   |
| H 0.6660 4.5640 -2.1850   | C -2.1500 -0.0180 -1.4370  | H 2.3370 -1.4230 3.0030   |
| H 1.8790 3.2500 -2.2300   | C -1.2070 0.9760 -1.9730   | H 1.0160 -0.4750 4.8840   |
| H 2.2690 -2.3440 2.4970   | C -1.1360 2.0870 -1.0610   | H -0.2620 1.6360 4.6100   |
| H 1.0090 -1.7670 4.5610   | H -2.2180 2.3670 0.8800    | H -0.2000 2.9070 2.4860   |
| H -0.1620 0.4130 4.7760   | Si 0.3340 3.2730 -0.7710   | H -2.7970 -2.1120 -1.5400 |
| H -0.0490 2.1120 2.9770   | C 1.3780 1.9850 0.1600     | H -0.9230 -2.8090 -2.9940 |
| H -2.9120 -1.7810 -2.0260 | C 2.2130 1.0000 -0.4660    | H 0.7630 -1.1540 -3.7960  |

|               |         |         |         |    |         |         |         |    |         |         |         |
|---------------|---------|---------|---------|----|---------|---------|---------|----|---------|---------|---------|
| H             | 0.5540  | 1.2570  | -3.2430 | H  | 2.2070  | -2.7680 | 0.3980  | H  | 0.2350  | -3.5920 | 1.9810  |
| Zr            | -0.0580 | 0.0420  | -0.1730 | Si | -0.4330 | -3.3610 | -1.2640 | H  | 2.7280  | 2.0610  | -1.2270 |
| C             | -0.8140 | -1.3840 | 1.3780  | C  | -1.4200 | -2.2560 | -0.0710 | H  | 0.7950  | 3.0130  | -2.4400 |
| H             | -1.7660 | -1.8590 | 1.0920  | C  | -2.2620 | -1.1670 | -0.4780 | H  | -0.9530 | 1.5310  | -3.4300 |
| H             | -0.0530 | -2.1740 | 1.5350  | C  | -2.4240 | -0.2160 | 0.5690  | H  | -0.7490 | -0.9390 | -3.3180 |
| H             | -0.9500 | -0.8690 | 2.3460  | C  | -1.7580 | -0.7600 | 1.7230  | Zr | 0.0300  | -0.2920 | -0.1240 |
| C             | 3.3180  | -1.2990 | 0.1310  | C  | -1.0930 | -1.9820 | 1.3210  | C  | 0.8780  | 0.8250  | 1.6200  |
| C             | 4.7180  | -1.0980 | 0.7450  | H  | -2.6690 | -1.0430 | -1.4820 | H  | 1.8240  | 1.3340  | 1.3760  |
| H             | 3.4100  | -1.4680 | -0.9540 | C  | 0.1470  | -4.9720 | -0.4960 | H  | 0.1400  | 1.5790  | 1.9550  |
| H             | 2.8690  | -2.2100 | 0.5660  | C  | -1.3770 | -3.6030 | -2.8710 | H  | 1.0500  | 0.1400  | 2.4690  |
| H             | 5.1760  | -0.2000 | 0.2930  | C  | -1.6660 | -0.2970 | 3.0610  | C  | -3.2750 | 1.0190  | 0.5510  |
| H             | 4.6010  | -0.8850 | 1.8210  | C  | -0.8950 | -1.0090 | 3.9550  | C  | -4.6760 | 0.7600  | 1.1440  |
| C             | 5.6380  | -2.3070 | 0.5480  | C  | -0.1910 | -2.1840 | 3.5540  | H  | -3.3740 | 1.3870  | -0.4830 |
| H             | 6.5720  | -2.1350 | 1.1120  | C  | -0.2750 | -2.6720 | 2.2660  | H  | -2.7880 | 1.8190  | 1.1370  |
| H             | 5.1670  | -3.2040 | 0.9920  | C  | 1.9880  | 1.4010  | -1.6740 | H  | -5.1820 | -0.0080 | 0.5320  |
| C             | -6.3110 | -2.9970 | 0.8430  | C  | 0.8990  | 1.9310  | -2.3420 | H  | -4.5570 | 0.3330  | 2.1540  |
| H             | -7.0920 | -3.1990 | 1.5950  | C  | -0.1020 | 1.0790  | -2.9160 | C  | -5.5360 | 2.0260  | 1.2090  |
| H             | -5.5690 | -3.8120 | 0.9380  | C  | 0.0100  | -0.3040 | -2.8620 | H  | -6.4810 | 1.7850  | 1.7270  |
| C             | 5.9900  | -2.5900 | -0.9160 | C  | 3.7710  | -0.3790 | 0.5590  | H  | -5.0250 | 2.7840  | 1.8330  |
| H             | 5.0710  | -2.8260 | -1.4840 | C  | 4.4370  | 0.9840  | 0.3580  | C  | 6.2930  | 2.5430  | 1.1800  |
| H             | 6.4110  | -1.6720 | -1.3670 | C  | 5.6620  | 1.1490  | 1.2610  | H  | 7.1110  | 2.6110  | 1.9180  |
| C             | -6.9340 | -3.0240 | -0.5560 | H  | 3.3840  | -0.4470 | 1.5910  | H  | 5.5440  | 3.3020  | 1.4770  |
| H             | -6.1710 | -2.9130 | -1.3460 | H  | 4.5490  | -1.1600 | 0.4790  | C  | -5.8600 | 2.6310  | -0.1590 |
| H             | -7.4630 | -3.9740 | -0.7370 | H  | 3.7220  | 1.7950  | 0.5870  | H  | -4.9280 | 2.9440  | -0.6670 |
| H             | -7.6620 | -2.2020 | -0.6750 | H  | 4.7310  | 1.1000  | -0.6990 | H  | -6.3200 | 1.8560  | -0.8010 |
| C             | 6.9840  | -3.7440 | -1.0580 | H  | 6.4140  | 0.3860  | 0.9880  | C  | 6.8470  | 2.8960  | -0.2050 |
| H             | 7.2300  | -3.9390 | -2.1150 | H  | 5.3640  | 0.9390  | 2.3040  | H  | 6.0290  | 2.8870  | -0.9500 |
| H             | 7.9240  | -3.5170 | -0.5250 | H  | -0.7040 | -5.5330 | -0.0740 | H  | 7.5600  | 2.1110  | -0.5170 |
| H             | 6.5720  | -4.6730 | -0.6270 | H  | 0.8830  | -4.8060 | 0.3080  | C  | -6.7990 | 3.8370  | -0.0660 |
|               |         |         |         | H  | 0.6280  | -5.6030 | -1.2650 | H  | -7.7360 | 3.5240  | 0.4300  |
|               |         |         |         | H  | -2.1030 | -4.4260 | -2.7530 | H  | -6.3410 | 4.6000  | 0.5900  |
|               |         |         |         | H  | -0.6920 | -3.8710 | -3.6940 | C  | -7.1110 | 4.4450  | -1.4350 |
|               |         |         |         | H  | -1.9440 | -2.7060 | -3.1700 | H  | -7.7890 | 5.3090  | -1.3480 |
|               |         |         |         | H  | -2.1970 | 0.6060  | 3.3670  | H  | -6.1860 | 4.7870  | -1.9330 |
|               |         |         |         | H  | -0.8160 | -0.6740 | 4.9910  | H  | -7.5910 | 3.7000  | -2.0950 |
|               |         |         |         | H  | 0.4110  | -2.7180 | 4.2930  | C  | 7.5350  | 4.2630  | -0.2210 |
| <b>CAT-11</b> |         |         |         |    |         |         |         |    |         |         |         |
| C             | 2.0070  | -2.0110 | -0.3610 |    |         |         |         |    |         |         |         |
| C             | 2.6670  | -0.7580 | -0.3910 |    |         |         |         |    |         |         |         |
| C             | 2.0600  | -0.0150 | -1.4610 |    |         |         |         |    |         |         |         |
| C             | 1.0780  | -0.8950 | -2.1150 |    |         |         |         |    |         |         |         |
| C             | 1.0370  | -2.1490 | -1.4100 |    |         |         |         |    |         |         |         |

H 8.3760 4.2850 0.4930

H 7.9310 4.5060 -1.2210

H 6.8290 5.0610 0.0700
